# Supplementary material for: Tyrosine Phosphorylation Profiling in FGF-2 Stimulated Human Embryonic Stem Cells
Source: PubMed Central journal article supplement (PMC3060089; doi:10.1371/journal.pone.0017538), 2011-03-17
Supplement: pone.0017538.s004.pdf [file pone.0017538.s004.pdf]

| IPI accession no. | Protein                                                                     | pY site | Peptide                  | Mascot score | Dataset      |
|-------------------|-----------------------------------------------------------------------------|---------|--------------------------|--------------|--------------|
| IPI00000024       | Isoform of protocadherin-1                                                  | 863     | DLpYAPKPSGK              | 31.9         | 5min_batch2  |
| IPI00000070       | Low-density lipoprotein receptor                                            | 828     | NINSINFDNPpYQK           | 74.5         | 15min_batch1 |
|                   |                                                                             | 845     | TTEDEVHICHNQDGPYSYPSR    | 48.9         | 15min_batch1 |
| IPI00000192       | Isoform F of protein son                                                    | 949     | LGQDPpYRLGHDPYR          | 20.6         | 5min_batch2  |
| IPI00000352       | Isoform 1 of dual specificity tyrosine-phosphorylated regulated-kinase 1B   | 63      | HINEVpYYAK               | 30.6         | 5min_batch1  |
|                   |                                                                             | 273     | IYQpYIQSR                | 53.6         | 0min_batch1  |
| IPI00000775       | Isoform 1 of leucine-rich repeats and immunoglobulin-like domains protein-1 | 941     | VVCSDCNTEVDCpYSR         | 72.9         | 60min_batch1 |
| IPI00000878       | Tyrosine protein kinase tec                                                 | 519     | YVLDQpYTSSGAK            | 34.9         | 60min_batch1 |
| IPI00001466       | Echinoderm microtubules associated protein-like 4                           | 226     | DVIINQEGEpYIK            | 71.5         | 60min_batch1 |
| IPI00001477       | Isoform 1 of epithelia discoidin domain-containing receptor 1               | 484     | EPPPpYQEPRPR             | 30.9         | 60min_batch2 |
|                   |                                                                             | 513     | GNPPHSAPCVNPGSALLSNPpYR  | 53.7         | 15min_batch1 |
|                   |                                                                             | 520     | LLLATpYARPPR             | 20.9         | 60min_batch1 |
|                   |                                                                             | 792     | NLpYAGDYpYR              | 29.4         | 1min_batch1  |
|                   |                                                                             | 792     | NLpYAGDYpYR              | 27.0         | 60min_batch2 |
|                   |                                                                             | 792     | NLpYAGDpYpYR             | 40.1         | 5min_batch1  |
|                   |                                                                             | 796     | NLpYAGDpYpYR             | 40.1         | 5min_batch1  |
|                   |                                                                             | 797     | NLYAGDYpYR               | 20.3         | 5min_batch2  |
|                   |                                                                             | 797     | NLpYAGDpYpYR             | 27.0         | 60min_batch2 |
| IPI00001654       | Isoform 3 of pericentrolar maternal 1 protein                               | 1004    | NNCPFSADENpYRPLAK        | 28.9         | 1min_batch1  |
|                   |                                                                             | 1215    | TEpY*MAFPKPFESSSIGAEKPR  | 48.3         | 5min_batch2  |
| IPI00001754       | Junctional adhesion molecule A                                              | 280     | KVIpYSQPSAR              | 55.1         | 60min_batch1 |
|                   |                                                                             | 280     | KVIpYSQPpSAR             | 41.0         | 60min_batch1 |
|                   |                                                                             | 280     | VIpYSQPSAR               | 48.7         | 60min_batch1 |
|                   |                                                                             | 280     | VIpYSQPpSARSEGEFK        | 20.7         | 15min_batch1 |
|                   |                                                                             | 280     | VIpYSQPSARpSEGEFK        | 34.9         | 5min_batch2  |
| IPI00001762       | Oligophrenin-1                                                              | 370     | LW*MEA*MDGKEIpYHSPITK    | 28.6         | 5min_batch2  |
| IPI00002211       | Isoform 2 of semaphorin-6A                                                  | 869     | *MSEVAQMALEDQAATLEpYK    | 47.6         | 1min_batch1  |
|                   |                                                                             | 933     | RLE*MHHSSSYGVDPYK        | 27.4         | 5min_batch2  |
|                   |                                                                             | 933     | LE*MHHSSSYGVDPYK         | 39.9         | 5min_batch2  |
|                   |                                                                             | 1009    | QPSLNApYpSLTR            | 24.1         | 5min_batch2  |
|                   |                                                                             | 1009    | QPSLNApYNSLTR            | 46.3         | 5min_batch2  |
| IPI00002491       | Isoform 9 of sorbin and SH3 domain-containing protein-1                     | 291     | LNRDDSDLpYSR             | 44.7         | 5min_batch2  |
| IPI00002857       | Isoform CSBP2 of mitogen-activated protein kinase 14                        | 182     | HTDDEMpTgPpYVATR         | 57.0         | 5min_batch1  |
|                   |                                                                             | 182     | HTDDE*MpTgPpYVATR        | 51.2         | 5min_batch1  |
|                   |                                                                             | 182     | HTDDE*MTgPpYVATR         | 68.3         | 5min_batch2  |
|                   |                                                                             | 182     | HTDDEMTgPpYVATR          | 75.0         | 60min_batch1 |
| IPI00002966       | Heat shock 70kDa protein 4                                                  | 336     | EDIpYAVEIVGGATR          | 67.2         | 5min_batch2  |
| IPI00003145       | Isoform 1 of mitogen-activated protein kinase 8                             | 185     | TAGTSFM*MTpYpVVTR        | 51.8         | 60min_batch1 |
|                   |                                                                             | 185     | TAGTSF*M*MTpYpVVTR       | 59.7         | 5min_batch1  |
|                   |                                                                             | 185     | TAGTSF*MMpTppYpVVTR      | 41.3         | 1min_batch1  |
|                   |                                                                             | 185     | TAGTSF*M*MpTppYpVVTR     | 40.1         | 5min_batch1  |
|                   |                                                                             | 185     | TAGTSFMpTppYpVVTR        | 46.0         | 1min_batch1  |
|                   |                                                                             | 185     | TAGTSF*MMTppYpVVTR       | 49.1         | 60min_batch1 |
| IPI00003373       | Occludin                                                                    | 287     | SNILWDKEHIpYDEQPPNVEEWVK | 35.5         | 60min_batch1 |
| IPI00003377       | Isoform 1 of splicing factor, arginine/serine rich 7                        | 33      | AFSpYYGPLR               | 39.9         | 1min_batch1  |
| IPI00003431       | Mitogen-activated protein kinase 6                                          | 467     | ESEVNHpYYEPK             | 20.6         | 5min_batch2  |
|                   |                                                                             | 468     | ESEVNHyYYEPK             | 25.5         | 5min_batch1  |
| IPI00003479       | Mitogen-activated protein kinase 1                                          | 187     | VADPDHDHpTGFLTEpYVATR    | 39.8         | 15min_batch1 |
|                   |                                                                             | 187     | VADPDHDHTGFLTEpYVATR     | 74.3         | 15min_batch2 |
|                   |                                                                             | 187     | VADPDHDHTGFLpTEpYVATR    | 50.2         | 5min_batch2  |
| IPI00003648       | Isoform 1 of poliovirus receptor-related protein 1                          | 468     | YDEDAKRppYFTVDEAEAR      | 70.0         | 15min_batch1 |
| IPI00003843       | cDNA FLJ53324, Highly similar to tight junction protein ZO-2                | 249     | GRpSIDQDpYER             | 42.0         | 5min_batch2  |
|                   |                                                                             | 261     | AYDPDpYERAYpSPEYR        | 39.8         | 15min_batch1 |
|                   |                                                                             | 265     | AYDPDpYERApYpSPEYR       | 37.0         | 1min_batch1  |
|                   |                                                                             | 423     | RHQpYSDYDYHSSSEK         | 38.3         | 5min_batch1  |
|                   |                                                                             | 426     | RHQYSDpDYHSSSEK          | 44.1         | 5min_batch2  |
|                   |                                                                             | 426     | HQYSDpDYHSSSEK           | 45.9         | 5min_batch2  |
|                   |                                                                             | 426     | RHQYSDpDYHSpSSSEK        | 26.6         | 15min_batch2 |
|                   |                                                                             | 506     | TFLRPSPEDEAlpYGPNTK      | 47.3         | 60min_batch1 |
|                   |                                                                             | 1007    | TQNKEEpYDFSK             | 53.9         | 60min_batch1 |
|                   |                                                                             | 1118    | HPDlpYAVPIK              | 36.4         | 60min_batch1 |
|                   |                                                                             | 1118    | IIEIAQKHDPDlpYAVPIK      | 40.7         | 15min_batch2 |
|                   |                                                                             | 1166    | GSYGpSDAEeEpYRQQLSEHSK   | 35.3         | 15min_batch1 |
| IPI00003865       | Isoform of heat shock cognate 71kDa protein                                 | 41      | TTPSpYVAFDTER            | 71.7         | 1min_batch2  |

|             |                                                                                       |      |                                   |       |              |
|-------------|---------------------------------------------------------------------------------------|------|-----------------------------------|-------|--------------|
| IPI00003921 | Isoform 1 of protein 4.1                                                              | 660  | LDGENIpYIR                        | 29.6  | 60min_batch1 |
| IPI00003985 | Mitochondria chaperone BCS1                                                           | 181  | TV*MYTAVGSEWRPFpYPR               | 62.4  | 1min_batch1  |
| IPI00004279 | Solute carrier family 15 member 1                                                     | 697  | SNPpYF*MSGANSQK                   | 32.5  | 60min_batch2 |
| IPI00004497 | Isoform 1 of breakpoint cluster protein                                               | 177  | KGHGQPGADAIEKPFpYVNVFHHHER        | 31.6  | 15min_batch1 |
|             |                                                                                       | 177  | GHGQPGADAIEKPFpYVNVFHHHER         | 58.9  | 15min_batch1 |
| IPI00004500 | NEDD4-binding protein 3                                                               | 83   | NEPADpYATLYYR                     | 51.3  | 1min_batch1  |
|             |                                                                                       | 87   | NEPADYATLpYYR                     | 60.7  | 1min_batch1  |
| IPI00004901 | cDNA FLJ20242 FIS clone COLF6369                                                      | 98   | VPSEGApYDILPR                     | 67.5  | 5min_batch2  |
|             |                                                                                       | 125  | AED*MpYSAQSHQAATPPKDGK            | 33.8  | 5min_batch1  |
|             |                                                                                       | 125  | AED*MpYSAQSHQAATPPKDGK            | 26.0  | 5min_batch2  |
|             |                                                                                       | 125  | AEDMpYSAQSHQAATPPKDGK             | 48.6  | 60min_batch1 |
|             |                                                                                       | 125  | AED*MpYSAQSHQAATPPK               | 38.1  | 5min_batch2  |
| IPI00005038 | Ribonuclease UK114                                                                    | 110  | AApYQVAALPK                       | 29.9  | 5min_batch1  |
| IPI00005126 | Isoform 1 of Ephrin-A4                                                                | 304  | TADSVFCPhpYEK                     | 56.6  | 5min_batch2  |
|             |                                                                                       | 330  | VSGDYGHPVYIVQE*MPPQSPANIpYYK<br>V | 39.5  | 5min_batch2  |
| IPI00005142 | Isoform 1 of basic fibroblast growth factor receptor 1                                | 583  | RPPGLEpYcYpYNPSHNPEEQLSSK         | 33.2  | 1min_batch1  |
|             |                                                                                       | 583  | RPPGLEpYcYpYNPSHNPEEQLSSK         | 51.3  | 15min_batch1 |
|             |                                                                                       | 585  | RPPGLEpYcYpYNPpSHNPEEQLSSK        | 34.4  | 1min_batch1  |
|             |                                                                                       | 585  | RPPGLEpYcYpYNPSHNPEEQLSSK         | 33.2  | 1min_batch1  |
|             |                                                                                       | 585  | RPPGLEpYcYpYNPSHNPEEQLSSK         | 48.2  | 15min_batch2 |
|             |                                                                                       | 653  | DIHHIDpYpYK                       | 32.8  | 60min_batch1 |
|             |                                                                                       | 653  | DIHHIDpYpYKK                      | 38.5  | 60min_batch1 |
|             |                                                                                       | 653  | DIHHIDpYpYK                       | 49.2  | 60min_batch2 |
|             |                                                                                       | 654  | DIHHIDpYpYK                       | 32.8  | 60min_batch1 |
|             |                                                                                       | 654  | DIHHIDpYpYKK                      | 46.9  | 15min_batch2 |
|             |                                                                                       | 654  | DIHHIDpYpYK                       | 38.5  | 60min_batch1 |
|             |                                                                                       | 654  | DIHHIDpYpYK                       | 23.4  | 15min_batch2 |
| IPI00005264 | Isoform 2 of plakophilin-2                                                            | 161  | AHpYTHSDYQYSQR                    | 44.1  | 60min_batch1 |
|             |                                                                                       | 166  | AHYTHSDpYQYSQR                    | 52.9  | 60min_batch1 |
|             |                                                                                       | 168  | AHYTHSDYQpYSQR                    | 39.3  | 15min_batch2 |
|             |                                                                                       | 631  | YSQNpYIQNR                        | 26.8  | 5min_batch2  |
| IPI00005416 | Nice-4 protein (fragment)                                                             | 354  | DGSLASNpYSGDLTK                   | 35.9  | 60min_batch2 |
| IPI00005741 | Mitogen-activated protein kinase 13                                                   | 182  | HADAEMTGpYVVTR                    | 66.6  | 60min_batch1 |
|             |                                                                                       | 182  | HADAE*MTGpYVVTR                   | 47.1  | 60min_batch2 |
|             |                                                                                       | 182  | HADAE*MpTGpYVVTR                  | 42.9  | 5min_batch1  |
| IPI00005904 | Probable ATP-dependent RNA helicase DDX20                                             | 756  | LQTEAQEDDwYDCHR                   | 39.9  | 1min_batch1  |
| IPI00006070 | Isoform CD34-F of hematopoietic progenitor cell antigen CD34                          | 286  | KLGLDFTEQDVApSHQSpYSQK            | 21.9  | 0min_batch1  |
| IPI00006176 | Isoform 1 of hepatocyte growth factor-regulated tyrosine kinase substrate             | 132  | VVQDTpYQI*MK                      | 26.2  | 1min_batch2  |
|             |                                                                                       | 132  | VVQDTpYQIMK                       | 29.9  | 60min_batch1 |
|             |                                                                                       | 216  | VCEPCpYEQLNR                      | 57.6  | 15min_batch2 |
| IPI00006196 | Isoform 2 of nuclear mitotic apparatus protein 1                                      | 1822 | KLDVVEEPDSANSSFPYSTR              | 40.0  | 1min_batch1  |
| IPI00006197 | Isoform 1 of nuclear valosin-containing protein-like                                  | 655  | GPELLN*MpYVGESER                  | 79.2  | 1min_batch1  |
| IPI00006482 | Isoform long of sodium/potassium-transporting ATPase subunit alpha-1                  | 260  | GIVVpYTGDR                        | 57.5  | 60min_batch2 |
| IPI00006608 | Isoform APP770 of amyloid beta A4 protein (fragment)                                  | 757  | *MQQNGpYENPTYKFFEQ*MQN            | 32.0  | 5min_batch1  |
|             |                                                                                       | 757  | *MQQNGpYENPTYK                    | 54.7  | 60min_batch2 |
|             |                                                                                       | 757  | MQQNGpYENPTYK                     | 65.0  | 60min_batch1 |
|             |                                                                                       | 762  | *MQQNGYENPTpYKFFEQ*MQN            | 32.7  | 5min_batch2  |
|             |                                                                                       | 762  | *MQQNGYENPTpYK                    | 50.3  | 60min_batch1 |
|             |                                                                                       | 762  | MQQNGYENPTpYK                     | 43.3  | 1min_batch2  |
| IPI00006658 | Isoform 2 of peptidyl-prolyl cis-trans isomerase nima-interacting 4                   | 147  | FGpYHII*MVEGR                     | 45.1  | 5min_batch2  |
|             |                                                                                       | 147  | FGpYHIIMVEGR                      | 47.0  | 15min_batch1 |
| IPI00007067 | Golgi-associated plant pathogenesis-related protein 1                                 | 42   | EAQqPpYSEALASTR                   | 55.1  | 60min_batch2 |
| IPI00007248 | Pleckstrin homology domain-containing family A member 6                               | 492  | SEDIpYADPAAYVMR                   | 54.4  | 1min_batch1  |
|             |                                                                                       | 492  | SEDIpYADPAAYV*MR                  | 102.6 | 15min_batch2 |
|             |                                                                                       | 492  | LPRSEDIpYADPAAYVMR                | 38.5  | 1min_batch1  |
|             |                                                                                       | 492  | LPRSEDIpYADPAAYV*MR               | 38.2  | 5min_batch2  |
| IPI00007582 | Sodium-and chloride-dependent creatine transporter 1                                  | 11   | KSAENGIpYSVSGDEK                  | 83.4  | 5min_batch2  |
|             |                                                                                       | 11   | SAENGIpYSVSGDEK                   | 67.5  | 1min_batch2  |
| IPI00007750 | Tubulin alpha-4A chain                                                                | 399  | FDL*MpYAK                         | 34.4  | 5min_batch2  |
| IPI00007935 | PDZ and LIM domain protein 5                                                          | 251  | YTEFpYHVPTSDASK                   | 40.2  | 5min_batch2  |
| IPI00008239 | cDNA FLJ55176, highly similar to G-protein coupled receptor family C group 5 member B | 376  | SNVpYQPTEMAVVLNGGTIPTAPPSHTG<br>R | 75.7  | 1min_batch1  |
| IPI00008290 | Ephrin receptor                                                                       | 833  | VLEDDPEAApYTTR                    | 81.8  | 1min_batch2  |

|             |                                                                                 |      |                                |       |              |
|-------------|---------------------------------------------------------------------------------|------|--------------------------------|-------|--------------|
| IPI00008315 | Ephrin type-B receptor 1                                                        | 600  | IYIDPFTpYEDPNEAVR              | 68.6  | 1min_batch2  |
|             |                                                                                 | 778  | YLQDDTSDPTpYTSSLGGK            | 68.0  | 15min_batch1 |
| IPI00008318 | Ephrin type-A receptor 4                                                        | 596  | TpYVDPFTpYEDPNQAVR             | 96.9  | 60min_batch1 |
|             |                                                                                 | 596  | TpYVDPFTpYEDPNQAVR             | 95.5  | 5min_batch2  |
|             |                                                                                 | 602  | TYVDPFTpYEDPNQAVR              | 92.0  | 1min_batch1  |
|             |                                                                                 | 602  | pTYVDPFTpYEDPNQAVR             | 81.5  | 1min_batch1  |
|             |                                                                                 | 602  | TpYVDPFTpYEDPNQAVR             | 95.5  | 5min_batch2  |
| IPI00008438 | 40S ribosomal protien S10                                                       | 12   | IAIpYELLFK                     | 62.5  | 15min_batch1 |
| IPI00008530 | 60S acidic ribosomal protein P0                                                 | 24   | IIQLLDDpYPK                    | 62.5  | 1min_batch2  |
| IPI00008868 | Microtubule-associated protein 1B                                               | 1062 | AAEAGGAEQpYGFLLTPTK            | 73.9  | 1min_batch2  |
|             |                                                                                 | 1796 | ESSLPpYSPTFSDSTSAVK            | 51.8  | 15min_batch1 |
|             |                                                                                 | 1889 | SPDEEDYDpYESYEK                | 44.3  | 1min_batch1  |
|             |                                                                                 | 1905 | TSDVGGYpYYEK                   | 25.6  | 60min_batch2 |
|             |                                                                                 | 1906 | TSDVGGYpYYEK                   | 40.7  | 5min_batch1  |
|             |                                                                                 | 1938 | TPEDGDpYSYEIEK                 | 47.5  | 1min_batch1  |
|             |                                                                                 | 1940 | TPEDGDYSpYEIEK                 | 58.7  | 1min_batch1  |
|             |                                                                                 | 2042 | TPDTSTYCPYETAEK                | 43.8  | 5min_batch2  |
| IPI00009236 | Isoform 1 of caveolin-1                                                         | 14   | YVDSHGHLpYTVPIR                | 79.8  | 5min_batch2  |
| IPI00009329 | Utrophin                                                                        | 2599 | Q*MPIGGDVPALQLQpYDHCK          | 39.5  | 5min_batch2  |
| IPI00009342 | Ras GTPase-activating-like protein IQGAP1                                       | 1510 | LQQTpYAALNSK                   | 51.1  | 5min_batch2  |
| IPI00010204 | Splicing factor, arginine/serine rich 2                                         | 32   | AFGpYYGPLR                     | 41.9  | 5min_batch2  |
| IPI00010490 | Isoform long of armadillo repeat protein deleted in velo-cardio-facial syndrome | 201  | DSPSpYGSLSR                    | 42.6  | 60min_batch2 |
|             |                                                                                 | 586  | RPPG*MEpYSYDINRVPEEQ*MTFK      | 52.7  | 1min_batch1  |
|             |                                                                                 | 656  | DINNIDpYpYKK                   | 33.0  | 5min_batch1  |
|             |                                                                                 | 656  | DINNIDpYpYKK                   | 36.6  | 0min_batch1  |
|             |                                                                                 | 657  | DINNIDpYpYKK                   | 33.0  | 5min_batch1  |
| IPI00010680 | Isoform 1 of fibroblast growth factor receptor 2                                | 657  | DINNIDpYpYKK                   | 30.4  | 5min_batch2  |
|             |                                                                                 | 494  | SGSSSpYSpYGP*MVSHTSVTNVGPR     | 57.4  | 1min_batch1  |
|             |                                                                                 | 494  | SGSSSpYSYGP*MVSHTSVTNVGPR      | 52.1  | 15min_batch1 |
|             |                                                                                 | 494  | SGSSSpYSYGP*MVSHTSVTNVGPR      | 83.8  | 1min_batch1  |
|             |                                                                                 | 496  | SGSSSpYSpYGP*MVSHTSVTNVGPR     | 58.2  | 1min_batch1  |
| IPI00010732 | Parathyroid hormone/parathyroid hormone-related peptide receptor                | 496  | SGSSSpYSpYGP*MVSHTSVTNVGPR     | 67.7  | 15min_batch1 |
|             |                                                                                 | 496  | SGSSSpYSpYGP*MVSHTSVTNVGPR     | 57.4  | 1min_batch1  |
|             |                                                                                 | 488  | FAQHGTfEpYEYSQR                | 73.8  | 1min_batch1  |
|             |                                                                                 | 214  | GPSEpYPTKNpYV                  | 31.7  | 5min_batch2  |
| IPI00010740 | Isoform long of splicing factor, proline-and glutamine rich                     | 219  | GPSEpYPTKNpYV                  | 31.7  | 5min_batch2  |
|             |                                                                                 | 219  | GPSEYPTKNpYV                   | 47.2  | 15min_batch2 |
|             |                                                                                 | 197  | KAPTNEfpYA                     | 25.8  | 60min_batch2 |
| IPI00011084 | Claudin 6                                                                       | 197  | KAPTNEfpYA                     | 25.8  | 60min_batch2 |
|             |                                                                                 | 148  | DALEVpYDVPPPTALR               | 65.2  | 1min_batch1  |
| IPI00011564 | Syndecin-4                                                                      | 163  | VPSSGPpYDCPASFSHPLTR           | 76.2  | 1min_batch1  |
|             |                                                                                 | 256  | VIpYDFIEK                      | 41.4  | 5min_batch1  |
| IPI00011652 | Isoform EFS1 of embryonal FYN-associated substrate                              | 256  | ETSKVIpYDFIEK                  | 20.3  | 60min_batch1 |
|             |                                                                                 | 464  | SREYDQLpYEEYTR                 | 56.6  | 15min_batch1 |
| IPI00011676 | Neural wiskott-aldrich syndrome proteir                                         | 464  | EYDQLpYEEYTR                   | 51.8  | 60min_batch2 |
|             |                                                                                 | 467  | EYDQLYEEpYTR                   | 43.4  | 5min_batch2  |
|             |                                                                                 | 605  | NETEDQpYALMEDEDDLPHHEER        | 121.3 | 15min_batch1 |
|             |                                                                                 | 605  | NETEDQpYAL*MEDEDDLPHHEER       | 103.1 | 1min_batch1  |
|             |                                                                                 | 256  | ETSKVIpYDFIEK                  | 20.3  | 60min_batch1 |
| IPI00011736 | Phosphatidylinositol 3-kinase regulatory subunit beta                           | 180  | AVPKEDIpYSGGGGGSR              | 49.9  | 5min_batch2  |
|             |                                                                                 | 128  | AQQGLpYQVPGPSPQFQSPPAK         | 62.9  | 15min_batch2 |
| IPI00011913 | Heterogenous nuclear ribonucleoprotein AC                                       | 234  | VGGQYVYEAQAQPEQDEpYDIPR        | 59.4  | 15min_batch1 |
|             |                                                                                 | 249  | HLLAPGPQDIpYDVPPVR             | 57.6  | 5min_batch2  |
|             |                                                                                 | 267  | GLLPSQYQEVpYDTPP*MAVK          | 50.7  | 1min_batch1  |
|             |                                                                                 | 287  | GNPGRDPLLEVpYDVPPSVEK          | 44.5  | 1min_batch1  |
|             |                                                                                 | 287  | DPLLEVpYDVPPSVEK               | 27.0  | 1min_batch1  |
|             |                                                                                 | 345  | EETpYDVPPFAK                   | 29.7  | 5min_batch2  |
|             |                                                                                 | 428  | VLPPEVADGGVVDsgVpYAVPPPAER     | 43.5  | 1min_batch1  |
|             |                                                                                 | 193  | SKFDNLpYGCR                    | 53.4  | 5min_batch2  |
| IPI00012007 | Adenosylhomocysteinase                                                          | 140  | HELQANCPYEEVKDR                | 56.3  | 15min_batch2 |
|             |                                                                                 | 404  | YG*MLLpYQNYR                   | 37.4  | 5min_batch2  |
| IPI00012011 | Cofilin-1                                                                       | 404  | YG*MLLpYQNYR                   | 23.5  | 1min_batch1  |
|             |                                                                                 | 397  | THAVSVSETDDpYAEIIDEEDTYT*MPSTR | 66.8  | 1min_batch1  |
| IPI00012752 | Isoform 3 of growth factor receptor-bound protein 10                            | 397  | THAVSVSETDDpYAEIIDEEDTYT*MPSTR | 63.8  | 5min_batch2  |
|             |                                                                                 | 397  | THAVSVSETDDpYAEIIDEEDTYT*MPSTR | 38.2  | 5min_batch2  |
|             |                                                                                 | 407  | THAVSVSETDDpYAEIIDEEDTYT*MPSTR | 38.2  | 5min_batch2  |
|             |                                                                                 | 407  | THAVSVSETDDpYAEIIDEEDTYT*MPSTR | 38.2  | 5min_batch2  |

|             |                                                                                   |      |                                        |       |              |
|-------------|-----------------------------------------------------------------------------------|------|----------------------------------------|-------|--------------|
|             |                                                                                   | 441  | CIGEGQFGDVHQGIpY*MSPENPALAVA<br>IK     | 50.3  | 0min_batch1  |
|             |                                                                                   | 570  | pY*MEDSTpYYK                           | 32.7  | 5min_batch1  |
|             |                                                                                   | 576  | Y*MEDSTpYYK                            | 42.2  | 0min_batch1  |
|             |                                                                                   | 576  | Y*MEDpSTpYYKASK                        | 34.6  | 5min_batch2  |
|             |                                                                                   | 576  | YMEDSTpYYKASK                          | 54.6  | 1min_batch2  |
|             |                                                                                   | 576  | Y*MEDSTpYpYK                           | 39.7  | 5min_batch1  |
|             |                                                                                   | 576  | YMEDSTpYpYKASK                         | 52.8  | 5min_batch2  |
|             |                                                                                   | 576  | Y*MEDSTpYYKASK                         | 56.8  | 60min_batch1 |
|             |                                                                                   | 576  | Y*MEDSpTpYYKASK                        | 40.3  | 5min_batch2  |
|             |                                                                                   | 576  | YMEDSTpYpYK                            | 37.8  | 15min_batch1 |
|             |                                                                                   | 576  | pY*MEDSTpYYK                           | 32.7  | 5min_batch1  |
|             |                                                                                   | 576  | Y*MEDSTpYpYKASK                        | 51.7  | 15min_batch2 |
|             |                                                                                   | 576  | YMEDSpTpYYKASK                         | 37.5  | 60min_batch1 |
|             |                                                                                   | 576  | YMEDSTpYYK                             | 51.3  | 15min_batch1 |
|             |                                                                                   | 576  | Y*MEDpSTpYYK                           | 20.4  | 5min_batch2  |
|             |                                                                                   | 577  | YMEDSTYpYKApSK                         | 23.1  | 5min_batch2  |
|             |                                                                                   | 577  | Y*MEDSTYpYK                            | 39.2  | 60min_batch1 |
|             |                                                                                   | 577  | Y*MEDSTpYpYKASK                        | 51.7  | 15min_batch2 |
|             |                                                                                   | 577  | Y*MEDSTpYpYK                           | 39.7  | 5min_batch1  |
|             |                                                                                   | 577  | YMEDSTpYpYKASK                         | 52.8  | 5min_batch2  |
|             |                                                                                   | 577  | YMEDSTpYpYK                            | 37.8  | 15min_batch1 |
|             |                                                                                   | 577  | YMEDSTYpYK                             | 54.8  | 60min_batch1 |
|             |                                                                                   | 861  | GSIDREDGSLQGPIGNQHIpYQPVGKPPD<br>AAPPK | 44.7  | 1min_batch1  |
| IPI00013068 | Eukaryotic translation initiation factor 3 subuni<br>E                            | 445  | SEAPNWTQDSGFpY                         | 70.4  | 1min_batch1  |
| IPI00013070 | Isoform 1 of heterogenous nuclear<br>ribonucleoprotein U-like protien 1           | 510  | NYILDQTNVpYGSAGR                       | 59.1  | 5min_batch2  |
| IPI00013174 | Isoform 1 of RNA binding protein 14                                               | 226  | ASpYVAPLTAQPATYR                       | 35.0  | 1min_batch1  |
| IPI00013396 | U1 small nuclear ribonucleoprotein C                                              | 8    | FYCDpYCDTYLTHDPSVR                     | 28.2  | 1min_batch1  |
| IPI00013721 | Serine/Threonine-protein kinase PRP4 homolog                                      | 849  | LCDFGSASHVADNDITPpYLVSR                | 79.8  | 1min_batch1  |
| IPI00013877 | Isoform 1 of heterogenous nuclear<br>ribonucleoprotein H13                        | 296  | DGMDNQGSpYGSVGR                        | 59.6  | 60min_batch1 |
| IPI00013881 | Heterogenous nuclear ribonucleoprotein H                                          | 266  | DLNpYCFSG*MSDHR                        | 54.3  | 5min_batch2  |
|             |                                                                                   | 266  | DLNpYCFSGMSDHR                         | 20.2  | 1min_batch1  |
| IPI00013894 | Stress-induced phosphoprotein 1                                                   | 354  | LApYINPDALALEEK                        | 23.2  | 1min_batch1  |
| IPI00013933 | Isoform DPI of desmoplakin                                                        | 28   | AESGFDLpYEVTSGGGGTSR                   | 58.1  | 1min_batch1  |
|             |                                                                                   | 56   | RGVITDQNSDGPYQQTGT*MSR                 | 49.7  | 5min_batch2  |
|             |                                                                                   | 172  | GGGGpYTCQSGSGWDEFTK                    | 82.3  | 5min_batch2  |
| IPI00013981 | Proto-oncogene tyrosine-protien kinase YES                                        | 222  | KLDNGGpYITTR                           | 79.7  | 60min_batch1 |
|             |                                                                                   | 223  | KLDNGGpYITTR                           | 49.8  | 0min_batch1  |
|             |                                                                                   | 426  | LIEDNEpYTAR                            | 61.6  | 5min_batch1  |
|             |                                                                                   | 446  | WTAPEAALpYGR                           | 28.2  | 5min_batch2  |
| IPI00013983 | Proto-oncogene tyrosine-protien kinase<br>receptor RET                            | 687  | RPAQAFPVSpYSSSGAR                      | 75.6  | 5min_batch2  |
|             |                                                                                   | 900  | DVpYEEDSpYVVKR                         | 36.6  | 5min_batch2  |
|             |                                                                                   | 900  | DVpYEEDpSYVVKR                         | 36.9  | 60min_batch2 |
|             |                                                                                   | 905  | DVpYEEDSpYVVKR                         | 36.6  | 5min_batch2  |
|             |                                                                                   | 905  | DVYEEDSpYVVKR                          | 27.8  | 5min_batch2  |
| IPI00013988 | Isoform 2 of RHO GTPase-activating protein 5                                      | 1108 | GYSDEIpYVVPDSSQNR                      | 72.6  | 5min_batch2  |
| IPI00014172 | Lysosomal-associated transmembrane protein<br>4A                                  | 230  | MPEKEPPPPpYLPA                         | 69.6  | 1min_batch1  |
|             |                                                                                   | 230  | *MPEKEPPPPpYLPA                        | 48.1  | 5min_batch2  |
| IPI00014177 | Isoform 1 of septin-2                                                             | 17   | QQPTQFINPETGpYVGFANLPNQVHR             | 66.9  | 15min_batch2 |
| IPI00014197 | Isoform 1 of protein CDV3 homolog                                                 | 190  | KTPQGPEIpYSDTQFPLQSTAK                 | 60.7  | 60min_batch1 |
|             |                                                                                   | 244  | LQLDNQpYAVLENQK                        | 66.0  | 15min_batch1 |
| IPI00014344 | Isoform long of dual specificity tyrosine-<br>phosphorylation-regulated kinase 1A | 145  | VYNDGYDDDNpYDYIVK                      | 115.4 | 15min_batch1 |
|             |                                                                                   | 145  | KVYNDGYDDDNpYDYIVK                     | 77.6  | 15min_batch2 |
|             |                                                                                   | 147  | VYNDGYDDDNpYDYIVK                      | 68.4  | 1min_batch2  |
| IPI00014424 | Elongation factor 1-alpha 2                                                       | 29   | STTTGHLpYK                             | 63.5  | 5min_batch2  |
|             |                                                                                   | 141  | EHALLApYTLGVK                          | 51.2  | 0min_batch1  |
| IPI00014454 | Isoform RIN1 of Ras and Rab interactor 1                                          | 36   | EKPAQDPLpYDVPNASGGQAGGQRPGR            | 83.2  | 15min_batch1 |
| IPI00014873 | cDNA FLJ59580, highly similar to cell division<br>protein kinase 10               | 50   | IGEGTpYGIVYRAR                         | 27.0  | 15min_batch1 |
| IPI00014898 | Isoform of plectin-1                                                              | 4615 | GYYSpYSVSGSGSTAGSR                     | 115.7 | 15min_batch1 |
| IPI00015180 | Protein shroom 2                                                                  | 210  | DSApYGSFSTSSSTPDHTLSK                  | 43.5  | 1min_batch1  |
|             |                                                                                   | 1257 | TLSTSEQFpYSR                           | 52.4  | 5min_batch1  |
| IPI00015287 | Isoform 1 of docking protien 1                                                    | 409  | VKEEGYELPYNPATDDpYAVPPPR               | 26.0  | 15min_batch1 |
|             |                                                                                   | 449  | SHNSALpYSQVQK                          | 79.8  | 60min_batch2 |
| IPI00015580 | Isoform 3 of formin-binding protein 1-like                                        | 291  | SGFEPPGDFPFEDYSQHIpYR                  | 34.9  | 1min_batch1  |

|             |                                                                       |      |                                              |      |              |
|-------------|-----------------------------------------------------------------------|------|----------------------------------------------|------|--------------|
| IPI00015756 | Isoform 1 of receptor-type tyrosine-protein phosphatase KAPPA         | 858  | YLCEGTESpYQTGQLHPAIR                         | 35.2 | 5min_batch2  |
| IPI00016371 | Isoform JM-A of receptor tyrosine-protein kinase ERBB-4               | 733  | VLGSGAFGTVpYK                                | 24.5 | 15min_batch1 |
| IPI00016373 | Ras-related protein Rab-13                                            | 5    | ApYDHLFK                                     | 54.5 | 5min_batch2  |
| IPI00016645 | Isoform 1 of ephrin type-A receptor 7                                 | 597  | ADQEGDEELpYFHFK                              | 59.7 | 1min_batch2  |
|             |                                                                       | 608  | TpYIDPETYEDPNR                               | 72.9 | 15min_batch1 |
|             |                                                                       | 614  | TYIDPETpYEDPNR                               | 48.8 | 5min_batch1  |
|             |                                                                       | 791  | VIEDDPEAVpYTTTGGK                            | 79.5 | 15min_batch1 |
|             |                                                                       | 791  | VIEDDPEAVpYTTTGGKIPVR                        | 47.5 | 15min_batch1 |
| IPI00016670 | RHOA activator C11ORF59                                               | 40   | ALNGAEPNpYHSLPSAR                            | 44.1 | 1min_batch1  |
| IPI00016736 | 1-phosphatidylinositol-4,5-bisphosphate phosphodiesterase gamma-1     | 472  | LAEGSApYEEVPTS*M*MYSENDISNSIK                | 37.5 | 5min_batch2  |
|             |                                                                       | 771  | IGTAEPDpYGALYEGR                             | 67.5 | 5min_batch1  |
|             |                                                                       | 775  | IGTAEPDYGALpYEGR                             | 39.5 | 5min_batch2  |
|             |                                                                       | 783  | NPGFpYVEANP*MPTFK                            | 75.2 | 0min_batch1  |
|             |                                                                       | 783  | NPGFpYVEANPMPTFK                             | 61.0 | 1min_batch1  |
|             |                                                                       | 977  | ACpYRDMSSFPETK                               | 46.7 | 5min_batch2  |
|             |                                                                       | 977  | ACpYRD*MSSFPETK                              | 40.8 | 60min_batch1 |
| IPI00016910 | Eukaryotic translation initiation factor 3 subunit C                  | 881  | QGTpYGGYFR                                   | 20.5 | 5min_batch2  |
|             |                                                                       | 884  | QGTpYGGpYFR                                  | 32.4 | 5min_batch2  |
| IPI00016932 | Isoform 1 of phosphatidylinositol-3,4,5-trisphosphate 5-phosphatase 2 | 886  | LpYEWISIDKDEAGAK                             | 80.6 | 15min_batch1 |
|             |                                                                       | 986  | NSFNNApYVLEGVPHQLPPEPPSPAR                   | 65.8 | 15min_batch2 |
|             |                                                                       | 1135 | TLSEVDpYAPAGPAR                              | 84.1 | 60min_batch2 |
| IPI00017292 | Isoform 1 of catenin beta-1                                           | 489  | LHpYGLPVVVK                                  | 32.1 | 60min_batch1 |
| IPI00017562 | Isoform 2 of latrophilin-2                                            | 1350 | RSENEIdpYK                                   | 60.4 | 5min_batch1  |
| IPI00017578 | SH2 domain-containing adaptor protein B                               | 201  | LDpYCGGSGEPGGVQR                             | 84.7 | 1min_batch2  |
|             |                                                                       | 333  | VTIADDpYSDPFDK                               | 73.4 | 15min_batch1 |
|             |                                                                       | 333  | DKVTIADDpYSDPFDK                             | 75.8 | 15min_batch1 |
|             |                                                                       | 333  | VTIADDpYSDPFDKNDLK                           | 43.1 | 1min_batch2  |
|             |                                                                       | 355  | GESAGpY*MEPYEAQR                             | 88.6 | 60min_batch1 |
|             |                                                                       | 355  | AGKGESAGpYMEPYEAQR                           | 96.6 | 5min_batch2  |
|             |                                                                       | 355  | AGKGESAGpY*MEPYEAQR                          | 78.3 | 5min_batch2  |
|             |                                                                       | 355  | GESAGpYMEPYEAQR                              | 81.4 | 5min_batch2  |
|             |                                                                       | 355  | AGKGESAGpY*MEPpYEAQR                         | 31.4 | 5min_batch2  |
|             |                                                                       | 359  | AGKGESAGpY*MEPpYEAQR                         | 31.4 | 5min_batch2  |
|             |                                                                       | 384  | GIQLpYDTPYEPEGQSVdSDSESTVSPR                 | 49.3 | 15min_batch2 |
|             |                                                                       | 384  | GIQLpYDTPYEPEGQSVdSDSESTVSPR                 | 63.2 | 1min_batch1  |
|             |                                                                       | 384  | GIQLpYDTPYEPEGQSVdSDpSESTVSPR                | 47.9 | 1min_batch1  |
|             |                                                                       | 423  | LPQDDRRPADEpYDQPWEWNR                        | 51.6 | 1min_batch1  |
| IPI00018195 | Mitogen-activated protein kinase 3                                    | 204  | IADPEHDHTGFLpTEpYVATR                        | 60.5 | 5min_batch2  |
|             |                                                                       | 204  | IADPEHDHTGFLTEpYVATR                         | 80.5 | 0min_batch1  |
| IPI00018274 | Isoform 1 of epidermal growth factor receptor                         | 1172 | GSHQISLDNPDpYQQDFFPK                         | 22.6 | 1min_batch1  |
| IPI00018335 | Isoform FLT1 of vascular endothelia growth factor receptor 1          | 1048 | DIpYKNPDpYVR                                 | 41.0 | 5min_batch2  |
|             |                                                                       | 1053 | DIpYKNPDpYVR                                 | 41.0 | 5min_batch2  |
| IPI00018434 | Isoform 1 of tumor susceptibility gene 101 protein                    | 390  | KTAGLSDLpY                                   | 28.1 | 5min_batch2  |
| IPI00018522 | HMT1 HNRNP methyltransferase-like 2 isoform 1                         | 309  | TGFSTSPESpYTHWK                              | 29.9 | 1min_batch1  |
| IPI00018534 | Histone H2B type 1-L                                                  | 43   | KESYSVYVpYK                                  | 52.5 | 5min_batch2  |
|             |                                                                       | 43   | KESYSVYVpYK                                  | 25.6 | 1min_batch1  |
| IPI00019025 | Partitioning defective 6 homolog beta                                 | 101  | KEEADpYSAFGTDTLIK                            | 76.5 | 1min_batch2  |
| IPI00019146 | Isoform 1 of coxsackievirus and adenovirus receptor                   | 313  | SYIGSNHSSLGS*MSPSN*MEGpYSK                   | 63.0 | 5min_batch1  |
|             |                                                                       | 313  | SYIGSNHSSLGSMSPSN*MEGpYSK                    | 43.8 | 1min_batch1  |
|             |                                                                       | 318  | TQpYNQVPSDFER                                | 57.5 | 15min_batch1 |
| IPI00019471 | Insulin receptor substrate 1                                          | 465  | GEEELSNpYIC*MGK                              | 66.5 | 5min_batch2  |
|             |                                                                       | 612  | GGHHRPDSSTLHTDDGpY*MP*MSPGVAPVPSGR           | 35.9 | 1min_batch1  |
|             |                                                                       | 662  | VDPNGpYMM*MSPSGGCSPDIGGGPSSSSSSNAVPSGTSYGK   | 35.8 | 15min_batch2 |
|             |                                                                       | 662  | VDPNGpYM*M*MSPSGGCSPDIGGGPSSSSSSNAVPSGTSYGK  | 23.9 | 1min_batch1  |
|             |                                                                       | 662  | VDPNGpY*M*M*MSPSGGCSPDIGGGPSSSSSSNAVPSGTSYGK | 46.4 | 1min_batch1  |
|             |                                                                       | 941  | CPSQLQAPREEETGTEEpY*MK                       | 30.7 | 5min_batch2  |
|             |                                                                       | 941  | CPSQLQAPREEETGTEEpYMK                        | 27.9 | 1min_batch1  |
| IPI00019502 | Isoform 1 of myosin-9                                                 | 754  | ALELDSNLpYR                                  | 49.2 | 15min_batch1 |

|             |                                                                          |      |                                     |       |              |
|-------------|--------------------------------------------------------------------------|------|-------------------------------------|-------|--------------|
|             |                                                                          | 1408 | VAApYDKLEK                          | 24.4  | 5min_batch1  |
| IPI00020096 | Isoform 1 of kinesin light chain 1                                       | 449  | DGTSFGEpYGGWYK                      | 41.0  | 1min_batch1  |
| IPI00020178 | Isoform 1 of signal transducing adaptor molecule 1                       | 384  | L*MNEDP*MYS*MpYAK                   | 28.1  | 5min_batch1  |
| IPI00020464 | Phosphoprotein associated with glycosphingolipid-enriched microdomains 1 | 359  | SPSSCNLDpYATVK                      | 43.5  | 60min_batch2 |
| IPI00020501 | Myosin-11                                                                | 761  | ALELDPNLpYR                         | 29.4  | 60min_batch1 |
| IPI00020729 | Insulin receptor substrate 4                                             | 743  | GpY*M*M*MFPR                        | 36.2  | 5min_batch2  |
| IPI00021076 | Isoform 1 of plakophilin-4                                               | 157  | SSTQMNSYSDSGpYQEAGSFHNSQNVS<br>K    | 70.3  | 1min_batch1  |
|             |                                                                          | 306  | QTSNPNPPTPQpYQTTAR                  | 45.5  | 5min_batch2  |
|             |                                                                          | 369  | TVHD*MEQFGQQQpYDIYER                | 63.7  | 1min_batch1  |
|             |                                                                          | 369  | TVHDMEQFGQQQpYDIYER                 | 50.9  | 1min_batch1  |
|             |                                                                          | 372  | TVHD*MEQFGQQQYDipYER                | 44.8  | 0min_batch1  |
|             |                                                                          | 372  | TVHDMEQFGQQQYDipYER                 | 70.2  | 15min_batch1 |
|             |                                                                          | 415  | SAVSPDLHITIpYEGR                    | 62.4  | 5min_batch2  |
|             |                                                                          | 415  | SAVpSPDLHITIpYEGR                   | 48.5  | 15min_batch2 |
|             |                                                                          | 420  | TpYYSVPYR                           | 39.5  | 5min_batch1  |
|             |                                                                          | 421  | TpYYSVPYR                           | 42.6  | 5min_batch2  |
|             |                                                                          | 443  | SPNHGTVELQGSQTALpYR                 | 48.7  | 1min_batch1  |
|             |                                                                          | 470  | NNpYALNTTATpYAEPYRPIQYR             | 55.3  | 5min_batch2  |
|             |                                                                          | 470  | NNpYALNTTATYAEPYRPIQYR              | 92.4  | 1min_batch1  |
|             |                                                                          | 478  | NNYALNTTATpYAEPYRPIQYR              | 82.8  | 5min_batch1  |
|             |                                                                          | 470  | NNpYALNTTATpYAEPYRPIQYR             | 55.3  | 5min_batch2  |
|             |                                                                          | 487  | NNYALNTTATYAEPYRPIQpYR              | 23.5  | 15min_batch1 |
|             |                                                                          | 1115 | LQHQQQLpYYSQDDSNRK                  | 40.1  | 60min_batch1 |
|             |                                                                          | 1116 | LQHQQQLpYYSQDDSNRK                  | 34.1  | 5min_batch2  |
|             |                                                                          | 1139 | LYLQSPHSpYEDPYFDDR                  | 54.9  | 15min_batch1 |
|             |                                                                          | 1143 | LYLQSPHSYEDPpYFDDR                  | 52.1  | 1min_batch1  |
|             |                                                                          | 1156 | VHFPASTDpYSTQYGLK                   | 83.7  | 5min_batch2  |
|             |                                                                          | 1168 | STTNpYVDFYSTK                       | 70.5  | 1min_batch2  |
|             |                                                                          | 1172 | STTNpYVDFpYSTK                      | 64.1  | 5min_batch2  |
| IPI00021267 | Ephrin type-A receptor 2                                                 | 575  | QSPEDVpYFSK                         | 32.0  | 5min_batch1  |
|             |                                                                          | 588  | SEQLKPLKTpYVDPHTYEDPNQAVLK          | 38.0  | 60min_batch1 |
|             |                                                                          | 588  | TpYVDPHpTYEDPNQAVLK                 | 44.9  | 5min_batch2  |
|             |                                                                          | 588  | SEQLKPLKTpYVDPHTpYEDPNQAVLK         | 38.3  | 1min_batch1  |
|             |                                                                          | 588  | SEQLKPLKTpYVDPHpTYEDPNQAVLK         | 33.0  | 15min_batch1 |
|             |                                                                          | 588  | TpYVDPHTYEDPNQAVLK                  | 45.1  | 1min_batch1  |
|             |                                                                          | 588  | TpYVDPHTpYEDPNQAVLK                 | 62.5  | 1min_batch1  |
|             |                                                                          | 594  | SEQLKPLKTpYVDPHTpYEDPNQAVLK         | 38.3  | 1min_batch1  |
|             |                                                                          | 594  | SEQLKPLKpTYVDPHTpYEDPNQAVLK         | 33.5  | 1min_batch1  |
|             |                                                                          | 594  | TYVDPHTpYEDPNQAVLK                  | 39.5  | 5min_batch1  |
|             |                                                                          | 594  | pTYVDPHTpYEDPNQAVLK                 | 57.5  | 5min_batch2  |
|             |                                                                          | 594  | TpYVDPHTpYEDPNQAVLK                 | 62.5  | 1min_batch1  |
|             |                                                                          | 772  | VLEDDPEATpYTTSGGKPIR                | 89.8  | 15min_batch2 |
|             |                                                                          | 772  | VLEDDPEATpYTTSGGK                   | 111.3 | 15min_batch2 |
| IPI00021275 | Isoform 1 of ephrin type-B receptor 2                                    | 780  | FLEDDTSDPTpYTSALGGK                 | 116.4 | 15min_batch1 |
| IPI00021290 | ATP-citrate synthase                                                     | 682  | TTDGVpYEGVAIGDDR                    | 60.8  | 5min_batch2  |
| IPI00021326 | SHC transforming protein 1 isoform 2                                     | 428  | ELFDDPSpYVNVQNLDK                   | 90.2  | 1min_batch2  |
| IPI00021396 | Vascular endothelia growth factor receptor 2                             | 801  | TGpYLSIV*MDPDELPLDEHCER             | 80.0  | 5min_batch2  |
|             |                                                                          | 1214 | FHpYDNTAGISQYLQNSK                  | 108.2 | 60min_batch1 |
| IPI00021428 | Actin, alpha skeletal muscle                                             | 93   | IWHHTFpYNELR                        | 35.2  | 1min_batch2  |
| IPI00021439 | Actin, cytoplasmic 1                                                     | 166  | TTGIV*MDSGDGVTHTVIpYEGYALPH<br>AILR | 34.8  | 0min_batch1  |
|             |                                                                          | 198  | GpYSFTTAEAR                         | 59.6  | 60min_batch2 |
|             |                                                                          | 294  | KDLpYANTVLSGGTT*MYPGIADR            | 41.3  | 5min_batch2  |
| IPI00021695 | Isoform D of plasma membrane calcium-transporting ATPase 1               | 53   | IQESpYGDVYGICTK                     | 44.6  | 1min_batch1  |
|             |                                                                          | 57   | KIQESYGDVpYIGICTK                   | 33.2  | 1min_batch1  |
| IPI00021917 | Isoform 1 of receptor-interacting serine/threonine-protein kinase 2      | 381  | KAQDCpYFMK                          | 28.8  | 5min_batch2  |
| IPI00021941 | Isoform 1 of disks large-associated protein 1                            | 118  | DGpYHTLQYK                          | 40.0  | 60min_batch2 |
| IPI00022228 | Vigilin                                                                  | 437  | MDpYVEINIDHK                        | 43.0  | 1min_batch1  |
| IPI00022296 | Isoform 1 of Mast/stem cell growth factor receptor                       | 703  | QEDHAEAAALpYKNLLHSK                 | 35.2  | 1min_batch1  |
|             |                                                                          | 703  | QEDHAEAAALpYK                       | 37.8  | 5min_batch1  |
|             |                                                                          | 936  | QISESTNHIpYSNLANCSPNR               | 27.3  | 15min_batch1 |
|             |                                                                          | 936  | QISESTNHIpYSNLANCpSPNR              | 36.3  | 15min_batch1 |
| IPI00022353 | Non-receptor tyrosine-protein kinase TYK2                                | 292  | LLAQAEGEPCpYIR                      | 40.4  | 1min_batch1  |
| IPI00022434 | Putative uncharacterized protein ALB                                     | 164  | YLpYEIAR                            | 29.5  | 5min_batch1  |
| IPI00022462 | Transferrin receptor protein 1                                           | 20   | SAFSNLFGEPLSpYTR                    | 93.3  | 15min_batch1 |

|             |                                                                                       |      |                                           |      |              |
|-------------|---------------------------------------------------------------------------------------|------|-------------------------------------------|------|--------------|
| IPI00022521 | Isoform 2 of dual specificity tyrosine-phosphorylation-regulated kinase 2             | 309  | VYTpYIQR                                  | 58.8 | 5min_batch1  |
| IPI00022558 | Isoform 1 of myelin protein zero-like protein 1                                       | 241  | SLPSGSHQGPVIpYAQLDHSGGHHSDK               | 46.6 | 15min_batch1 |
|             |                                                                                       | 263  | INKSESVVpYADIR                            | 65.0 | 5min_batch2  |
|             |                                                                                       | 263  | SESVVpYADIR                               | 62.9 | 60min_batch2 |
|             |                                                                                       | 263  | SESVVpYADIRK                              | 42.9 | 60min_batch2 |
| IPI00022661 | Isoform delta of poliovirus receptor-related protein 2                                | 513  | INIPpYDALSYSPSDSYQGK                      | 83.9 | 1min_batch1  |
| IPI00022959 | Isoform 1 of poliovirus receptor-related protein 3                                    | 511  | FERP*MDYpYEDLK                            | 28.1 | 1min_batch1  |
|             |                                                                                       | 511  | FERPMDYpYEDLK                             | 25.9 | 15min_batch1 |
| IPI00023343 | Isoform 1 of disks large homolog 3                                                    | 673  | DNEVDGQDpYHFVVS                           | 42.5 | 60min_batch1 |
|             |                                                                                       | 511  | RDNEVDGQDpYHFVVS                          | 51.0 | 1min_batch1  |
| IPI00023461 | Isoform 3 of afadin                                                                   | 94   | YSLpYEVHVSGER                             | 83.2 | 15min_batch2 |
| IPI00023503 | Cell division protein kinase 3                                                        | 43   | IGEGTpYGVVYK                              | 59.5 | 0min_batch1  |
|             |                                                                                       | 43   | IGEGpTpYGVVYK                             | 75.2 | 5min_batch2  |
|             |                                                                                       | 43   | IGEGTpYGVVpYK                             | 63.8 | 5min_batch2  |
|             |                                                                                       | 47   | IGEGTYGVVpYK                              | 54.9 | 1min_batch1  |
|             |                                                                                       | 47   | IGEGTpYGVVpYK                             | 63.8 | 5min_batch2  |
|             |                                                                                       | 47   | IGEGpTYGVVpYK                             | 39.9 | 0min_batch1  |
| IPI00023530 | Cell division protein kinase 5                                                        | 15   | IGEGTpYGTVFK                              | 53.5 | 15min_batch2 |
| IPI00023704 | Lipoma-preferred partner                                                              | 244  | SAQPSPHYMAAPSSGQIpYSGPQGYNTQPVPVSGQCPPSTR | 56.6 | 15min_batch1 |
|             |                                                                                       | 273  | GG*MDpYAYIPPPGLQPEPGYGYAPNQR              | 42.3 | 1min_batch1  |
|             |                                                                                       | 297  | YpYEGYAAAGPGYGGR                          | 57.9 | 1min_batch1  |
|             |                                                                                       | 300  | YYEGpYAAAGPGYGGR                          | 51.8 | 5min_batch2  |
|             |                                                                                       | 301  | YYEGYpYAAAGPGYGGR                         | 83.1 | 1min_batch1  |
|             |                                                                                       | 317  | NDSDPpYGOQGHNTWK                          | 54.3 | 5min_batch1  |
| IPI00023785 | DEAD box polypeptide 17 isoform 4                                                     | 580  | TTSSANNPNL*MpYQDECDRR                     | 32.0 | 5min_batch2  |
| IPI00023942 | Syndecan 3 (SYND3). Isoform 2                                                         | 383  | QASVTYQKPKQEEFpYA                         | 30.5 | 1min_batch1  |
| IPI00023974 | Pituitary tumour-transforming gene 1 protein interacting protein                      | 174  | YGLFKEENPpYAR                             | 31.5 | 15min_batch1 |
| IPI00024067 | Isoform 1 of clathrin heavy chain 1                                                   | 634  | ALEHFTDLpYDIKR                            | 58.4 | 5min_batch2  |
| IPI00024087 | Pyruvate dehydrogenase E1 component subunit alpha, testis-specific form, mitochondria | 287  | pYHGHS*MSDPGVSpYR                         | 31.2 | 15min_batch2 |
|             |                                                                                       | 299  | YHGHSMSDPGVSpYR                           | 42.5 | 60min_batch1 |
|             |                                                                                       | 299  | YHGHPs*MSDPGVSpYR                         | 30.3 | 60min_batch1 |
|             |                                                                                       | 299  | YHGHS*MSDPGVSpYR                          | 35.6 | 60min_batch1 |
|             |                                                                                       | 299  | pYHGHS*MSDPGVSpYR                         | 31.2 | 15min_batch2 |
| IPI00024097 | Isoform 1 of testin                                                                   | 251  | EGDPAIpYAER                               | 21.0 | 5min_batch2  |
| IPI00024282 | Ras-related protein Rab-8B                                                            | 5    | TrYDYLFK                                  | 44.9 | 60min_batch1 |
| IPI00024307 | Ephrin-B1                                                                             | 313  | TTENNpYCPHYEK                             | 36.3 | 5min_batch2  |
|             |                                                                                       | 317  | TTENNYCPHYEK                              | 50.3 | 60min_batch2 |
| IPI00024312 | FYVE, RHOGEF and PH domain containing protein 1                                       | 621  | LLpYCVPR                                  | 37.1 | 5min_batch2  |
| IPI00024320 | Putative RNA-binding protein 3                                                        | 127  | YYDSRPGGYpYGYGR                           | 21.3 | 15min_batch1 |
|             |                                                                                       | 129  | YYDSRPGGYpYGYGR                           | 42.7 | 1min_batch1  |
| IPI00024382 | cDNA FLJ1103, highly similar to clip-associating protein 2                            | 1234 | DYNPpYNYSDSISPFNK                         | 44.3 | 1min_batch1  |
| IPI00024673 | Isoform alpha-2 of mitogen-activated protein kinase 9                                 | 185  | TACTNF*M*MTPpYVVTR                        | 86.9 | 1min_batch1  |
|             |                                                                                       | 185  | TACTNF*MMTPpYVVTR                         | 47.0 | 5min_batch2  |
|             |                                                                                       | 185  | TACTNFM*MTPpYVVTR                         | 68.3 | 60min_batch1 |
|             |                                                                                       | 185  | TACTNFMTPpYVVTR                           | 56.6 | 1min_batch1  |
| IPI00024911 | Endoplasmic reticulum protein ERP25                                                   | 66   | FDTQYpYGEKQDEFK                           | 39.1 | 1min_batch1  |
| IPI00025803 | Insulin receptor precursor                                                            | 1205 | DIpYETDpYYRK                              | 40.2 | 5min_batch2  |
|             |                                                                                       | 1205 | DIpYETDYR                                 | 54.8 | 15min_batch1 |
|             |                                                                                       | 1205 | DIpYETDYpYR                               | 33.5 | 1min_batch2  |
|             |                                                                                       | 1205 | DIpYETDpYYR                               | 30.2 | 5min_batch1  |
|             |                                                                                       | 1205 | DIpYETDYR                                 | 50.4 | 1min_batch1  |
|             |                                                                                       | 1205 | DIpYETDYpYR                               | 29.3 | 5min_batch2  |
|             |                                                                                       | 1205 | DIpYEpTDYR                                | 29.3 | 60min_batch2 |
|             |                                                                                       | 1205 | DIpYETDpYpYR                              | 44.9 | 5min_batch2  |
|             |                                                                                       | 1209 | DIYEpTDpYpYR                              | 21.9 | 5min_batch2  |
|             |                                                                                       | 1209 | DIpYETDpYYR                               | 40.2 | 5min_batch2  |
|             |                                                                                       | 1209 | DIpYETDpYpYR                              | 44.9 | 5min_batch2  |
|             |                                                                                       | 1209 | DIYETDYR                                  | 39.5 | 1min_batch2  |
|             |                                                                                       | 1209 | DIpYETDpYYR                               | 30.2 | 5min_batch1  |
|             |                                                                                       | 1209 | DIYEpTDpYYR                               | 36.9 | 5min_batch1  |
|             |                                                                                       | 1209 | DIYETDpYYR                                | 29.7 | 5min_batch1  |
|             |                                                                                       | 1210 | DIpYETDpYpYR                              | 44.9 | 5min_batch2  |
|             |                                                                                       | 1210 | DIpYETDYpYR                               | 33.5 | 1min_batch2  |
|             |                                                                                       | 1210 | DIYEpTDpYpYR                              | 21.9 | 5min_batch2  |

|             |                                                                      |      |                                                  |      |              |
|-------------|----------------------------------------------------------------------|------|--------------------------------------------------|------|--------------|
|             |                                                                      | 1210 | DIYETDYpYR                                       | 30.5 | 60min_batch1 |
|             |                                                                      | 1210 | DlPYETDYpYRK                                     | 29.3 | 5min_batch2  |
|             |                                                                      | 1210 | DIYETDYpYRK                                      | 33.5 | 60min_batch2 |
|             |                                                                      | 1375 | SpYEEHIPpYTH*MNGGK                               | 34.6 | 5min_batch2  |
|             |                                                                      | 1381 | SpYEEHIPpYTH*MNGGK                               | 34.6 | 5min_batch2  |
| IPI00025830 | WEE1-like protein kinase                                             | 132  | SPAAPpYFLGSSFSFVVR                               | 68.2 | 5min_batch2  |
| IPI00025846 | Isoform 2A of desmocollin-2                                          | 823  | YTpYSEWHSFTQPR                                   | 70.4 | 15min_batch1 |
|             |                                                                      | 853  | HAQDpYVLTLYNYEGR                                 | 46.1 | 1min_batch1  |
| IPI00026689 | Putative uncharacterized protein DKFZP686L20222                      | 15   | IGEGpTpYGVVYKGR                                  | 56.9 | 15min_batch1 |
|             |                                                                      | 15   | IGEGTpYGVVYKGR                                   | 48.1 | 1min_batch1  |
|             |                                                                      | 15   | IEKIGEGTpYGVVYK                                  | 29.4 | 5min_batch2  |
|             |                                                                      | 15   | IEKIGEGpTpYGVVYK                                 | 42.9 | 5min_batch2  |
|             |                                                                      | 19   | IGEGTYGVVpYKGR                                   | 78.6 | 60min_batch1 |
| IPI00026889 | Isoform DAB555 of disabled homolog 1                                 | 232  | EGVpYDVPK                                        | 22.0 | 15min_batch2 |
| IPI00026904 | cDNA FLJ59367, highly similar to adenylosuccinate lyase              | 294  | QQIGSSA*MPpYK                                    | 23.6 | 5min_batch2  |
| IPI00026952 | Plakophilin-3                                                        | 84   | GQpYHTLQAGFSSR                                   | 73.2 | 5min_batch2  |
|             |                                                                      | 176  | ADpYDTLSLR                                       | 24.8 | 60min_batch2 |
| IPI00027174 | Isoform 1 of fibroblast growth factor receptor 3                     | 647  | DVHNLDPYpYK                                      | 45.3 | 5min_batch1  |
|             |                                                                      | 647  | DVHNLDPYpYK                                      | 36.8 | 1min_batch2  |
|             |                                                                      | 648  | DVHNLDPYpYK                                      | 45.3 | 5min_batch1  |
|             |                                                                      | 648  | DVHNLDPYpYK                                      | 22.8 | 5min_batch2  |
| IPI00027232 | Insulin-like growth factor 1 receptor                                | 1346 | ASFDERQpYAH*MNGGR                                | 29.8 | 5min_batch2  |
| IPI00027252 | Prohibitin-2                                                         | 121  | VLSRPNAQELPS*MpYQR                               | 28.4 | 1min_batch1  |
| IPI00027269 | E3 ubiquitin-protein ligase CBL                                      | 674  | IKPSSSANAlpYSLAARPLVPK                           | 31.4 | 15min_batch1 |
| IPI00027422 | Isoform beta-4C of intergrin beta-4                                  | 1207 | VCAyGAQGEGPpYSSLVSCR                             | 57.0 | 5min_batch2  |
| IPI00027438 | Flotillin-1                                                          | 203  | VSAQpYLSEIEMAK                                   | 57.3 | 15min_batch1 |
| IPI00027667 | Isoform 1 of gastrin/cholecystokinin type B receptor                 | 294  | CRPETGAVGEDSDGCpYVQLPR                           | 48.8 | 1min_batch1  |
| IPI00027705 | Isoform 1 of DNA primase large subunit                               | 381  | IILSNPPSQGDpYHGCPFR                              | 29.8 | 1min_batch1  |
| IPI00027721 | Isoform 1 of alpha-type platelet-derived growth factor receptor      | 762  | SLpYDRPASpYK                                     | 38.5 | 1min_batch2  |
|             |                                                                      | 768  | SLpYDRPASpYK                                     | 38.5 | 1min_batch2  |
| IPI00027834 | Heterogenous nuclear ribonucleoprotein L                             | 92   | TDNAGDQHGGGGGGGAGAAGGGG<br>GGENpYDDPHKTPASPVVHIR | 30.7 | 1min_batch1  |
| IPI00028065 | Cytoplasmic protein NCK1                                             | 105  | LpYDLN*MPAYVK                                    | 48.2 | 15min_batch2 |
|             |                                                                      |      | LpYDLNMPAYVK                                     | 51.2 | 60min_batch1 |
| IPI00028570 | Isoform 1 of glycogen synthase kinase-3 beta                         | 216  | GEPNVSpYICSR                                     | 64.6 | 5min_batch2  |
|             |                                                                      |      | GEPNVSpYICpSR                                    | 54.3 | 5min_batch1  |
| IPI00028931 | Desmoglein-2                                                         | 968  | VpYAPASTLVDQPYANEGTVVVTER                        | 44.6 | 1min_batch1  |
|             |                                                                      | 979  | VYAPASTLVDQPPYANEGTVVVTER                        | 54.1 | 1min_batch1  |
|             |                                                                      | 1013 | VIQPHGGGSNPLEGTQHLQDVpPYVMV<br>R                 | 27.5 | 1min_batch2  |
| IPI00029111 | Collapsin response mediator protein long variant                     | 545  | NHQSAAEpYNIFEG*MELR                              | 36.7 | 5min_batch2  |
| IPI00029263 | Proto-oncogene tyrosine-protein kinase FER                           | 402  | VQENDGKEPPPpVpYEEDAR                             | 78.4 | 5min_batch2  |
|             |                                                                      | 714  | QEDGGVpYSSSGLK                                   | 66.9 | 60min_batch2 |
| IPI00029273 | Isoform 1 of hepatocyte growth factor receptor                       | 1003 | SVSPPTTEMVSNESVdPYR                              | 80.4 | 1min_batch1  |
|             |                                                                      | 1234 | D*MYDKEpYpYSVHNK                                 | 27.9 | 5min_batch2  |
|             |                                                                      | 1234 | D*MYDKEpYYSVHNK                                  | 46.7 | 5min_batch2  |
|             |                                                                      | 1234 | DMYDKEpYYSVHNK                                   | 34.1 | 60min_batch1 |
|             |                                                                      | 1235 | D*MYDKEpYpYSVHNK                                 | 27.9 | 5min_batch2  |
| IPI00029422 | Kinesin-line protein KIF20A                                          | 869  | TPTCQSSTDCSPpYAR                                 | 69.2 | 60min_batch1 |
| IPI00029449 | Vang-like protein 2                                                  | 308  | VpYSLGEENSTNNSTGQSR                              | 99.5 | 60min_batch1 |
|             |                                                                      | 342  | DNSHNEYpYEEAEHER                                 | 42.7 | 1min_batch1  |
| IPI00029515 | Isoform 1 of pleckstrin homology domain-containing family A member 3 | 134  | ERPIS*MINEASNYVTSDpYAVHP*MSP<br>VGR              | 51.3 | 5min_batch2  |
|             |                                                                      | 398  | GGNRPNTGpLYTEADR                                 | 58.0 | 5min_batch2  |
| IPI00029601 | Src substrate cortactin                                              | 178  | SAVGFDpYQGKTEK                                   | 35.8 | 5min_batch2  |
|             |                                                                      | 421  | LPSpSPVpYEDAASFK                                 | 70.2 | 1min_batch2  |
|             |                                                                      | 421  | LPSpSPVpYEDAASFK                                 | 83.4 | 60min_batch2 |
|             |                                                                      | 421  | TQpTPPVSPAPQTEERLPSSPpYEDAA<br>SFK               | 74.4 | 1min_batch1  |
|             |                                                                      | 421  | TQTPPVSPAPQTEERLPSPpYEDAA<br>SFK                 | 67.3 | 1min_batch1  |
|             |                                                                      | 421  | TQTPPVSPAPQTEERLPSSPpYEDAAS<br>FK                | 76.2 | 1min_batch2  |
|             |                                                                      | 446  | GPVSGTEPEPpYSMEAADYR                             | 87.8 | 15min_batch2 |
|             |                                                                      | 446  | GPVSGTEPEPpYS*MEAADYR                            | 76.8 | 60min_batch2 |
| IPI00029702 | Isoform 1 of protein tyrosine kinase 2 beta                          | 579  | YIEDEDpYKASVTR                                   | 54.8 | 1min_batch1  |
|             |                                                                      | 580  | YIEDEDYpYKASVTR                                  | 37.3 | 15min_batch1 |
| IPI00029731 | 60S ribosomal protein L35A                                           | 34   | IEGVpYAR                                         | 35.1 | 5min_batch2  |
| IPI00029756 | Proto-oncogene tyrosine-protein kinase MER                           | 749  | KIpYSGDpYYR                                      | 48.6 | 60min_batch1 |



|             |                                                                                |      |                                   |       |              |
|-------------|--------------------------------------------------------------------------------|------|-----------------------------------|-------|--------------|
|             |                                                                                | 749  | KIpYSGDYpYR                       | 31.1  | 60min_batch2 |
|             |                                                                                | 753  | IYSGDpYYR                         | 31.7  | 60min_batch1 |
|             |                                                                                | 753  | KIpYSGDpYYR                       | 48.6  | 60min_batch1 |
|             |                                                                                | 753  | KIYSGDpYYR                        | 42.3  | 60min_batch1 |
|             |                                                                                | 754  | KIYSGDYpYR                        | 40.5  | 15min_batch2 |
|             |                                                                                | 754  | IYSGDYpYR                         | 31.1  | 5min_batch1  |
| IPI00029769 | Isoform P59-HCK of tyrosine-protein kinase HCK                                 | 188  | TLDNGGFpYISPR                     | 71.0  | 15min_batch1 |
|             |                                                                                | 390  | VIEDNEpYTAR                       | 64.5  | 60min_batch1 |
|             |                                                                                | 390  | VIEDNEpYTAREGAK                   | 36.7  | 5min_batch2  |
| IPI00030320 | Probable ATP-dependent RNA helicase DDX6                                       | 473  | SLYVAEpYHSEPVEDEKP                | 24.0  | 1min_batch1  |
| IPI00030887 | Tyrosine-protein kinase receptor TYRO3                                         | 828  | DQPpYSGAGDGSg*MGAVGGTPSDCR        | 96.6  | 60min_batch2 |
| IPI00031030 | Isoform 1 of amyloid-like protien 2                                            | 750  | MQNHGpYENPTYK                     | 55.6  | 60min_batch2 |
|             |                                                                                | 750  | *MQNHGpYENPTYK                    | 38.8  | 60min_batch1 |
|             |                                                                                | 755  | MQNHGYENTPYK                      | 56.0  | 60min_batch1 |
|             |                                                                                | 755  | *MQNHGYENTPYK                     | 53.2  | 5min_batch2  |
|             |                                                                                | 755  | *MQNHGYENTPYKYLEQ*MQI             | 48.0  | 15min_batch1 |
| IPI00031068 | Isoform 1 of GRB2-associated-binding protein 1                                 | 242  | HGMNGFFQqQ*MIpYDSPPSR             | 42.1  | 15min_batch1 |
|             |                                                                                | 242  | HG*MNGFFQqQMIpYDSPPSR             | 49.1  | 15min_batch1 |
|             |                                                                                | 242  | HG*MNGFFQqQ*MIpYDSPPSR            | 79.4  | 15min_batch2 |
|             |                                                                                | 259  | APSASVDSSLpYNLPR                  | 115.2 | 5min_batch2  |
|             |                                                                                | 373  | TASDITDSSpYCIPTAG*MSPSR           | 80.6  | 5min_batch2  |
|             |                                                                                | 406  | DASSQDCpYDIPR                     | 46.1  | 15min_batch2 |
|             |                                                                                | 406  | KDASSQDCpYDIPR                    | 56.7  | 60min_batch1 |
|             |                                                                                | 659  | SSGSGSSVADERVDPYVVVDQqK           | 69.9  | 1min_batch1  |
| IPI00031195 | Isoform 1 of vang-like protein 1                                               | 344  | DSSHNLpYEEAEHER                   | 21.7  | 15min_batch1 |
| IPI00031386 | Phosphatidylinositol-4,5-bisphosphate 3-kinase catalytic subunit alpha isoform | 508  | EAGFSpYSHAGLSNR                   | 45.0  | 5min_batch2  |
| IPI00031407 | Enhancer of filamentation 1                                                    | 166  | TGHGYpYVEYPSR                     | 34.3  | 5min_batch2  |
|             |                                                                                | 261  | QAGRDLRPEGVpYDIPPTCTKPAGK         | 20.5  | 1min_batch1  |
|             |                                                                                | 317  | HQSLSPNHPPPQLGQSVGSQNDApYDVP R    | 67.8  | 1min_batch1  |
|             |                                                                                | 317  | RHQSLSPNHPPPQLGQSVGSQNDApYD VPR   | 49.2  | 15min_batch1 |
|             |                                                                                | 345  | ANPQERDGVpYDVPLHNPPDAK            | 40.4  | 15min_batch1 |
|             |                                                                                | 345  | DGVpYDVPLHNPPDAK                  | 68.9  | 1min_batch1  |
| IPI00031461 | cDNA FLJ60299, highly similar to Rab GDP dissociation inhibitor beta           | 203  | TDDYLDQPCpYETINR                  | 87.9  | 15min_batch2 |
| IPI00031681 | Cell division kinase 2                                                         | 15   | IGEGTpYGVVYKAR                    | 38.5  | 5min_batch2  |
| IPI00031812 | Nuclease-sensitive element-binding protein 1                                   | 208  | RPQpYSNPPVQGEV*MEGADNQGAGEQ GRPVR | 75.3  | 1min_batch1  |
|             |                                                                                | 208  | RPQpYSNPPVQGEVMEGADNQGAGEQ GRPVR  | 55.4  | 1min_batch1  |
| IPI00032003 | Emerin                                                                         | 85   | KEDALLpYQSK                       | 60.5  | 5min_batch2  |
|             |                                                                                | 94   | GYNDdpYEEESYFTTR                  | 87.8  | 15min_batch1 |
| IPI00032426 | Protein MEMO1                                                                  | 210  | YSYDESQGEIpYR                     | 61.3  | 15min_batch1 |
| IPI00033025 | 51kDa protein                                                                  | 320  | KLAAVTPYNGVDNnk                   | 89.2  | 5min_batch2  |
|             |                                                                                | 320  | LAAVTPYNGVDNnk                    | 91.4  | 5min_batch2  |
| IPI00043622 | Isoform 1 of ferm domain-containing protein 6                                  | 412  | DTGPEDSpYSSSAIHR                  | 69.0  | 5min_batch2  |
| IPI00043978 | Isoform 1 of partitioning defective 3 homolog B                                | 1000 | DHLEGLpYAK                        | 42.4  | 5min_batch1  |
|             |                                                                                | 1000 | DGHPLSPERDHLEGLpYAK               | 23.7  | 15min_batch1 |
| IPI00044678 | Isoform 1 of serine/threonine-protein kinase PFTAIRE-2                         | 63   | LGEgSpYATVYK                      | 50.9  | 5min_batch2  |
| IPI00045423 | Isoform 7 of partitioning defective 3 homolog                                  | 388  | FSPDSQpYIDNR                      | 41.1  | 60min_batch2 |
|             |                                                                                | 489  | DVTIGGSAPIpYVK                    | 52.4  | 5min_batch1  |
|             |                                                                                | 706  | ISHSLpYSGIEGLDESpsR               | 82.1  | 15min_batch1 |
|             |                                                                                | 706  | RISHpSLpYSGIEGLDESpsR             | 50.9  | 5min_batch2  |
|             |                                                                                | 706  | RISHSLpYSGIEGLDESpsR              | 73.6  | 15min_batch1 |
|             |                                                                                | 706  | RISHSLpYpSGIEGLDESpsR             | 45.6  | 15min_batch2 |
|             |                                                                                | 997  | ERDPYAEIQDFHR                     | 30.7  | 15min_batch2 |
|             |                                                                                | 1044 | EGH*M*MDALpYAQVK                  | 40.6  | 5min_batch2  |
|             |                                                                                | 1044 | EGHM*MDALpYAQVK                   | 25.9  | 60min_batch1 |
|             |                                                                                | 1044 | EGHMMDALpYAQVK                    | 61.6  | 15min_batch1 |
|             |                                                                                | 1044 | EGH*MMDALpYAQVK                   | 37.7  | 15min_batch2 |
|             |                                                                                | 1138 | QpYpSSLPR                         | 21.7  | 5min_batch2  |
|             |                                                                                | 1161 | KNASSVSQDSWEQNpYSPGEGFQSAK        | 68.3  | 1min_batch1  |
|             |                                                                                | 1230 | KQPPSEGPSNYDspYK                  | 21.8  | 5min_batch2  |
| IPI00053621 | Zinc finger protein 99                                                         | 77   | IHpTRENIPYK                       | 21.6  | 1min_batch1  |
| IPI00054004 |                                                                                | 65   | YFDSGDpYN*MAK                     | 44.5  | 60min_batch2 |
| IPI00059185 | Uncharacterized protein C11ORF52                                               | 78   | SPGLMSEDSNLHpYADIQVCSRPHAR        | 46.8  | 60min_batch1 |

|             |                                                                                           |      |                             |      |              |
|-------------|-------------------------------------------------------------------------------------------|------|-----------------------------|------|--------------|
|             |                                                                                           | 78   | SPGL*MSEDSNLHpYADIQVCSRPHAR | 25.7 | 5min_batch2  |
|             |                                                                                           | 103  | HVHLENATEpYATLR             | 48.9 | 1min_batch1  |
| IPI00059292 | Protein mago nashi homolog 2                                                              | 42   | YANNNSNpYKNDV*MIR           | 48.1 | 5min_batch1  |
|             |                                                                                           | 42   | YANNNSNpYKNDVMIR            | 30.0 | 15min_batch1 |
| IPI00059964 | Isoform 1 of gamma secretase subunit APH-1A                                               | 256  | V*MVpYSALR                  | 32.0 | 60min_batch2 |
| IPI00061178 | RNA binding motif protein, X-linked-like 1                                                | 134  | GGH*MDDGGpYS*MNFN*MSSSR     | 66.6 | 60min_batch2 |
|             |                                                                                           | 243  | DYTpYRDYGHSSSR              | 21.2 | 5min_batch2  |
| IPI00063784 | Isoform long of vesicle transport through interaction with T-snares homolog 1B            | 115  | YGIpYAVENEHMNR              | 23.0 | 1min_batch1  |
| IPI00064607 | Isoform 1 of multiple epidermal growth factor-like domains 10                             | 1061 | RDSPpYAEINNSTSANR           | 84.4 | 5min_batch2  |
|             |                                                                                           | 1061 | DSPpYAEINNSTSANR            | 73.5 | 15min_batch2 |
|             |                                                                                           | 1099 | LSQDPpYDLPK                 | 35.4 | 5min_batch2  |
|             |                                                                                           | 1111 | NSHIPChpYDLLPVR             | 41.8 | 15min_batch1 |
| IPI00072377 | Isoform 1 of protein SET                                                                  | 146  | IDFYFDENpYFENK              | 57.9 | 5min_batch2  |
| IPI00099522 | Isoform 1 of homeodomain-interacting protein kinase 3                                     | 359  | TVCSTpYLQpSR                | 26.1 | 60min_batch2 |
|             |                                                                                           | 359  | TVCSTpYLQSR                 | 37.7 | 1min_batch2  |
| IPI00099883 | Isoform 1 of G-protein coupled receptor family C group 5 member C                         | 312  | SSPEQSpYQGD*MpYPTR          | 43.9 | 5min_batch2  |
|             |                                                                                           | 312  | SSPEQSpYQGD*MYPTR           | 53.6 | 5min_batch2  |
|             |                                                                                           | 317  | SSPEQSpYQGD*MpYPTR          | 43.9 | 5min_batch2  |
| IPI00101049 | Putative uncharacterized protein NMD3                                                     | 236  | LISQDIHSNTpYNYK             | 65.7 | 60min_batch1 |
| IPI00103013 | Sorting Nexin-33                                                                          | 264  | LTPTHAASPpYR                | 51.6 | 60min_batch1 |
| IPI00103018 | Putative uncharacterized protein KIAA1217                                                 | 244  | NVpYYELNDVR                 | 66.0 | 1min_batch1  |
|             |                                                                                           | 393  | NEGFpYADPYLYHEGR            | 59.7 | 0min_batch1  |
|             |                                                                                           | 399  | NEGFYADPYLpYHEGR            | 25.9 | 1min_batch1  |
| IPI00107633 | Isoform 2 of SH3 and multiple ankyrin repeat domains protein 2                            | 228  | CFPAGSD*MNSVpYER            | 67.5 | 5min_batch2  |
|             |                                                                                           | 228  | CFPAGSDMNSVpYER             | 52.1 | 15min_batch1 |
| IPI00107698 | Fibroblast growth factor receptor substrate 2                                             | 306  | LVpYENINGLSIPSASGVR         | 86.8 | 1min_batch2  |
| IPI00140420 | Staphylococcal nuclease domain-containing protein 1                                       | 908  | ADDADEFGpYSR                | 64.7 | 5min_batch2  |
| IPI00149048 | Isoform 2 of mitogen-activated protein kinase 7                                           | 82   | GLCTSPAEHQYFMTEpYVATR       | 61.8 | 1min_batch1  |
|             |                                                                                           | 82   | GLCTSPAEHQYFMTEpYVATR       | 55.8 | 1min_batch1  |
|             |                                                                                           | 82   | GLCTSPAEHQYF*MpTEpYVATR     | 42.6 | 15min_batch1 |
|             |                                                                                           | 82   | GLCTSPAEHQYF*MTEpYVATR      | 58.2 | 60min_batch1 |
| IPI00152093 | Isoform 3 of periphilin-1                                                                 | 57   | SFpYSSHYAR                  | 43.2 | 5min_batch2  |
| IPI00152881 | Shroom family member 3 protein                                                            | 501  | ESGpYIAPQGACNK              | 38.0 | 60min_batch1 |
| IPI00162743 | Isoform 2 of suppression of tumorigenicity 5                                              | 81   | ENPpYEDVDLK                 | 49.1 | 5min_batch2  |
| IPI00165157 | Sodium potassium-transporting ATPase subunit beta-1-interacting protein 1                 | 160  | TSHLQLQPLpYTSG              | 42.4 | 15min_batch1 |
| IPI00165946 | Isoform 2 of membrane-associated guanylate kinase, WW and PDZ domain-containing protein 1 | 373  | IEDPVpYGIYYVDHINR           | 42.6 | 5min_batch1  |
|             |                                                                                           | 373  | IEDPVpYGIYYVDHINRK          | 45.4 | 0min_batch1  |
| IPI00166680 | Isoform 3 of misshapen-like kinase 1                                                      | 706  | SNSAWQIpYLQR                | 76.0 | 1min_batch1  |
| IPI00167198 | Isoform 2 of U4/U6 small nuclear ribonucleoprotein PRP31                                  | 205  | IpYEYVESR                   | 24.1 | 5min_batch2  |
| IPI00168459 | Isoform 2 of pleckstrin homology-like domain family B member 2                            | 131  | ADFDHpYTGRDSER              | 21.2 | 5min_batch2  |
| IPI00169383 | Phosphoglycerate kinase 1                                                                 | 196  | ELNpYFAK                    | 22.9 | 5min_batch1  |
| IPI00170865 | Isoform 4 of membrane-associated guanylate kinase, WW and PDZ domain-containing protein 3 | 353  | IEDPQpYGTYYVDHLNQK          | 53.2 | 15min_batch1 |
| IPI00171134 | Isoform 1 of girdin                                                                       | 1765 | KTEDTpYFISSAGKPTPGTQGK      | 67.4 | 5min_batch2  |
| IPI00171499 | Isoform 3 of FAM59A                                                                       | 74   | QWTTITAHSLLEEGHpYVIGPK      | 25.0 | 1min_batch2  |
|             |                                                                                           | 453  | SELPpYEELWLEEGKPSHQPLTR     | 53.4 | 1min_batch2  |
| IPI00174976 | Isoform 1 of MAGUK P55 subfamily member 5                                                 | 243  | VpYESIQYGGETVK              | 60.7 | 60min_batch1 |
| IPI00175416 | Isoform 1 of 1-phosphatidylinositol-4,5-bisphosphate phosphodiesterase ETA-1              | 1275 | HATNTVpYETTCIPISK           | 83.0 | 5min_batch2  |
| IPI00176458 | Isoform 2 of protocadherin-1                                                              | 1089 | LGPLALPEDHpYER              | 44.2 | 15min_batch1 |
| IPI00176662 |                                                                                           | 31   | LVQSPNSpYFMDVK              | 69.5 | 15min_batch1 |
|             |                                                                                           | 31   | LVQSPNSpYF*MDVK             | 55.5 | 5min_batch2  |
| IPI00176903 | Isoform 1 of polymerase and transcript release factor                                     | 308  | SFTPDHVpYAR                 | 25.9 | 0min_batch1  |
| IPI00179053 | Isoform 1 of breast cancer anti-estrogen resistance protein 3                             | 266  | CLEEHpYGTSPGQAR             | 37.2 | 5min_batch1  |
| IPI00179330 | Ubiquitin and ribosomal protein S27A precursor                                            | 148  | CCLTpYCFNKPEDK              | 37.3 | 1min_batch1  |
| IPI00180143 | Dual specificity protein kinase CLK4                                                      | 80   | YVDEYRNDpYCEGYVPR           | 36.2 | 5min_batch2  |

|             |                                                                    |      |                                    |       |              |
|-------------|--------------------------------------------------------------------|------|------------------------------------|-------|--------------|
| IPI00181265 | cDNA FLJ56060, weakly similar to ferm domain-containing protein 4E | 398  | SSEVLpYERPQPTPAFSSR                | 49.6  | 15min_batch1 |
| IPI00181905 | Isoform 1 of actin filament-associated protein 1 like 2            | 413  | VAQQPLSLVVGCEVVPDPSDHLpYSFR        | 76.6  | 1min_batch1  |
| IPI00182118 | Isoform 2 of probable palmitoyltransferase ZDHHC8                  | 449  | EPpSPVRpYDNLSR                     | 41.4  | 5min_batch2  |
| IPI00182469 | Isoform 1AB of catenin delta-1                                     | 96   | LNGPQDHSLLpYSTIPR                  | 58.8  | 15min_batch1 |
|             |                                                                    | 96   | LNGPQDHSLLpYpSTIPR                 | 34.2  | 1min_batch1  |
|             |                                                                    | 213  | NFHYPpDgPYSR                       | 28.1  | 5min_batch2  |
|             |                                                                    | 217  | HpYEDGYPGGSDNYGSLSR                | 77.1  | 15min_batch1 |
|             |                                                                    | 228  | HYEDGYPGGSDNpYgPpSLSR              | 68.8  | 15min_batch2 |
|             |                                                                    | 228  | HYEDGYPGGSDNpYgSLSR                | 83.8  | 60min_batch2 |
|             |                                                                    | 257  | QDVpYGPQpQVR                       | 57.5  | 60min_batch1 |
|             |                                                                    | 257  | ApSRQDVpYGPQpQVR                   | 45.4  | 1min_batch1  |
|             |                                                                    | 257  | APSRQDVpYGPQpQVR                   | 40.3  | 5min_batch2  |
|             |                                                                    | 296  | S*MGYDDLpYGMMSDYGTAR               | 81.3  | 1min_batch1  |
|             |                                                                    | 296  | S*MGYDDLpYg*M*MSDYGTAR             | 70.1  | 1min_batch1  |
|             |                                                                    | 302  | S*MGYDDLpYg*M*MSDpYGTAR            | 69.2  | 5min_batch2  |
|             |                                                                    | 334  | SYED*MIGEEVPSDQpYYWAPLAQHER        | 81.2  | 5min_batch1  |
|             |                                                                    | 898  | SLDNNpYSTPNER                      | 79.5  | 60min_batch2 |
| IPI00182798 | Isoform 1 of PAX-interacting protein 1                             | 704  | YTGpYLCR                           | 25.6  | 5min_batch2  |
| IPI00183046 | Isoform 3 of tyrosine-protein phosphatase non-receptor type 6      | 525  | HKEDVpYENLHTK                      | 27.2  | 15min_batch2 |
| IPI00183445 | Isoform 1 of Latrophilin 1                                         | 1337 | AEIELLpYK                          | 23.2  | 5min_batch2  |
| IPI00183526 | NCL protein                                                        | 235  | SISLYpYTGEK                        | 31.7  | 1min_batch2  |
| IPI00185526 | Putative uncharacterized protein SAMSN1                            | 247  | VHTDFTPSPpYDTSLSK                  | 71.6  | 1min_batch1  |
| IPI00185919 | Isoform 1 of LA-related protein 1                                  | 361  | THFDpYQFGYR                        | 26.5  | 5min_batch2  |
| IPI00186826 | Ephrin receptor                                                    | 574  | EAEpYSDKHGQYLIGHGTK                | 42.3  | 60min_batch1 |
|             |                                                                    | 590  | VpYIDPFTpYEDPNEAVR                 | 70.2  | 15min_batch2 |
|             |                                                                    | 596  | VpYIDPFTpYEDPNEAVR                 | 70.2  | 15min_batch2 |
|             |                                                                    | 596  | VYIDPFTpYEDPNEAVR                  | 90.3  | 1min_batch1  |
|             |                                                                    | 774  | FLEENpSSDPTpYTSSLGGK               | 76.2  | 1min_batch1  |
|             |                                                                    | 774  | FLEENSSDPTpYTSSLGGK                | 114.8 | 15min_batch1 |
|             |                                                                    | 935  | SQAKPGTGGTGGPAPQpY                 | 44.4  | 5min_batch1  |
| IPI00186990 | Isoform 1 of GRB2-associated-binding protein 2                     | 293  | GSLTGSETDNEVpYTFK                  | 77.3  | 1min_batch1  |
|             |                                                                    | 409  | ASSCETpYEYPQR                      | 32.5  | 5min_batch2  |
| IPI00215637 | ATP-dependent RNA helicase DDX3X                                   | 69   | DKDAppYSSFGSR                      | 41.6  | 5min_batch2  |
| IPI00215716 | Isoform B of band 4.1-like protein 3                               | 471  | DS*MSAAEVGTGQpYATTK                | 62.3  | 5min_batch2  |
| IPI00215948 | Isoform 1 of catenin alpha-1                                       | 177  | NAGNEQDLGIQpYK                     | 89.3  | 5min_batch1  |
|             |                                                                    | 619  | LvpYDGIR                           | 23.1  | 0min_batch1  |
| IPI00215949 | Isoform 2 of homeodomain-interacting protein kinase 2              | 361  | AVCSTpYLQpSR                       | 43.1  | 60min_batch1 |
|             |                                                                    | 361  | AVCSTpYLQSR                        | 55.3  | 5min_batch2  |
| IPI00215965 | Isoform A1-B of heterogenous nuclear ribonucleoprotein A1          | 341  | SSGPpYGGGGQYFAKPR                  | 47.6  | 60min_batch1 |
|             |                                                                    | 347  | SSGPYGGGGQpYFAKPR                  | 74.2  | 5min_batch2  |
|             |                                                                    | 357  | NQGGpYGGSSSSSYGSGR                 | 92.4  | 60min_batch1 |
| IPI00215980 | Isoform alpha of poliovirus receptor-related protein 2             | 408  | KSPGGAGGGASGDGGFpYDPK              | 39.5  | 5min_batch2  |
| IPI00216008 | Isoform long of glucose-6-phosphate 1-dehydrogenase                | 549  | VGFQpYEGTYK                        | 28.7  | 5min_batch2  |
|             |                                                                    | 553  | VGFQYEGTpYK                        | 44.2  | 5min_batch2  |
| IPI00216049 | Isoform 1 of heterogenous nuclear ribonucleoprotein K              | 323  | GGDL*MApYDRR                       | 28.7  | 5min_batch2  |
| IPI00216171 | Gamma enolase                                                      | 44   | AAVPSGASTGIpYEALER                 | 105.2 | 5min_batch2  |
| IPI00216219 | Isoform long of tight junction protein ZO-1                        | 830  | LSYLSAPGSEpYS*MYSTDSR              | 79.7  | 15min_batch1 |
|             |                                                                    | 830  | LSYLSAPGSEpYSMYSTDSR               | 72.0  | 1min_batch1  |
|             |                                                                    | 895  | SSEPVEDSSG*MHHENQTPpPPYSPQAQpQPIHR | 25.1  | 60min_batch1 |
|             |                                                                    | 895  | EDSSGMHHENQTPpPPYSPQAQpQPIHR       | 26.6  | 1min_batch1  |
|             |                                                                    | 1059 | DLEQTPpYR                          | 30.2  | 5min_batch2  |
|             |                                                                    | 1059 | DLEQTPpYRESSSYTDQFSR               | 55.2  | 15min_batch1 |
|             |                                                                    | 1061 | DLEQTYRpYESSSYTDQFSR               | 52.2  | 5min_batch2  |
|             |                                                                    | 1066 | YESSSpYTDQFSR                      | 49.0  | 5min_batch1  |
|             |                                                                    | 1140 | FEEPAPLSpYDSRPR                    | 46.3  | 5min_batch2  |
|             |                                                                    | 1191 | LRPEAQPHPSAGPKPAESKQpYFEQYSR       | 24.4  | 15min_batch1 |
|             |                                                                    | 1191 | QpYFEQYSR                          | 35.7  | 60min_batch2 |
|             |                                                                    | 1195 | QYFEQpYSR                          | 28.3  | 1min_batch2  |
|             |                                                                    | 1346 | SNHpYDPEEDEEYpYRK                  | 57.5  | 15min_batch2 |
|             |                                                                    | 1354 | SNHYDPEEDEEYpYRK                   | 57.1  | 15min_batch1 |
|             |                                                                    | 1355 | SNHYDPEEDEEYpYRK                   | 56.6  | 60min_batch2 |
|             |                                                                    | 1361 | QLSpYFDRR                          | 27.7  | 5min_batch1  |

|             |                                                                |      |                                           |      |              |
|-------------|----------------------------------------------------------------|------|-------------------------------------------|------|--------------|
|             |                                                                | 1398 | SFENKPPAHIAASHLSEPAKPAHSQNQS<br>NFSSpYSSK | 34.4 | 15min_batch1 |
| IPI00216423 | Isoform 3 of inteseectin-2                                     | 552  | LlpYLVPEK                                 | 34.7 | 1min_batch2  |
|             |                                                                | 967  | EEPEALpYAAVVK                             | 67.5 | 5min_batch2  |
|             |                                                                | 967  | REEPEALpYAAVVK                            | 86.3 | 60min_batch1 |
| IPI00216592 | Isoform C1 of heterogenous nuclear<br>ribonucleoproteins C1/C2 | 124  | MpYSYPAR                                  | 28.1 | 1min_batch2  |
| IPI00216969 | Isoform 1A of proto-oncogene tyrosine-protein<br>kinase ABL1   | 185  | INTASDGKlpYVSSESER                        | 48.4 | 5min_batch2  |
|             |                                                                | 257  | LGGGQYGEVpYEGVWVK                         | 46.7 | 1min_batch1  |
|             |                                                                | 257  | LGGGQYGEVpYEGVWVK                         | 60.2 | 15min_batch1 |
|             |                                                                | 393  | LMTGDTpYTAHAGAK                           | 66.7 | 15min_batch2 |
|             |                                                                | 393  | L*MTGDTpYTAHAGAK                          | 69.8 | 5min_batch2  |
| IPI00216991 | Isoform 3 of ARF GTPase-activating protein<br>GIT2             | 469  | KQATTNVpYQVQTGSEYTDTSNHSSLK               | 34.0 | 1min_batch1  |
|             |                                                                | 469  | QATTNVpYQVQTGSEYTDTSNHSSLKR               | 34.0 | 1min_batch1  |
|             |                                                                | 469  | QATTNVpYQVQTGSEYTDTSNHSSLK                | 76.3 | 1min_batch1  |
|             |                                                                | 577  | QNSTPESDpYDNTPNDEPDGMGSSR                 | 54.0 | 1min_batch1  |
|             |                                                                | 577  | QNSTPESDpYDNTPNDEPDGMGSSR                 | 55.6 | 1min_batch1  |
|             |                                                                | 577  | QNSTPESDpYDNTPNDEPDGMGSSR                 | 41.9 | 60min_batch2 |
| IPI00217054 | Isoform long of E3 ubiquitin-protein ligase<br>SMURF-1         | 413  | IEVSREEIFEepSpYR                          | 23.6 | 60min_batch1 |
| IPI00217059 | Isoform 2 of coiled-coil domain-containing<br>protein 50       | 455  | NERPARPPPPPI*MTDGEDADpYTHFTNQ<br>QSSTR    | 48.4 | 1min_batch1  |
| IPI00217223 | Multifunctional protein ADE2                                   | 48   | TKEVpYELLDSPGK                            | 36.0 | 5min_batch2  |
| IPI00217418 | Isoform 2 of RHO GTPase-activating protein<br>12               | 243  | ATTPPNQGRPDpSPVpYANLQELK                  | 31.9 | 15min_batch1 |
|             |                                                                | 243  | ATpTPPNQGRPDpSPVpYANLQELK                 | 49.0 | 5min_batch2  |
|             |                                                                | 243  | ApTTPPNQGRPDpSPVpYANLQELK                 | 39.9 | 15min_batch2 |
| IPI00217563 | Isoform beta-1A of integrin beta-1                             | 783  | WDTGENIpYK                                | 50.8 | 60min_batch2 |
| IPI00217872 | Isoform 2 of phosphoglucomutase-1                              | 371  | IAlpYETPTGWK                              | 35.7 | 1min_batch1  |
| IPI00218487 | Gap junction alpha-1 protein                                   | 137  | FKpYGIEEHGK                               | 39.0 | 60min_batch1 |
|             |                                                                | 247  | SDPpYHATSGALpSPAKDCGSQK                   | 29.5 | 60min_batch1 |
|             |                                                                | 247  | SDPpYHATSGALSPAK                          | 57.2 | 15min_batch2 |
|             |                                                                | 247  | SDPpYHApTSGALSPAK                         | 44.4 | 60min_batch1 |
|             |                                                                | 247  | GKSDPpYHATSGALSPAK                        | 64.0 | 5min_batch2  |
|             |                                                                | 265  | DCGSQKpYApYFNGCSSPTAPLSP*MSPP<br>GYK      | 47.4 | 5min_batch2  |
|             |                                                                | 265  | DCGpSQKpYAYFNGCSSPTAPLSP*MSPP<br>GYK      | 47.2 | 15min_batch2 |
|             |                                                                | 267  | DCGSQKpYApYFNGCSSPTAPLSP*MSPP<br>GYK      | 47.4 | 5min_batch2  |
|             |                                                                | 267  | YApYFNGCSSPTAPLSPMSPPGYK                  | 37.3 | 1min_batch1  |
|             |                                                                | 267  | YApYFNGCSSPTAPLSP*MSPPGYK                 | 35.8 | 5min_batch2  |
|             |                                                                | 286  | YAYFNGCSSPTAPLSP*MSPPGpYK                 | 21.6 | 1min_batch1  |
|             |                                                                | 313  | QASEQNWANpYSAEQNR                         | 99.0 | 60min_batch2 |
|             |                                                                | 313  | QApSEQNWANpYSAEQNR                        | 50.9 | 1min_batch1  |
| IPI00218570 | Phosphoglycerate mutase 2                                      | 92   | HpYGGTLGNK                                | 33.1 | 15min_batch2 |
| IPI00219217 | L-lactate dehydrogenase B chain                                | 240  | *MVVESApYEVVK                             | 41.2 | 0min_batch1  |
|             |                                                                | 240  | MVVESApYEVVK                              | 37.6 | 1min_batch2  |
| IPI00219299 | Talin-2                                                        | 28   | T*MQFEPSTAVpYDACR                         | 59.5 | 5min_batch2  |
|             |                                                                | 1667 | ECDpYSIDGINR                              | 42.5 | 0min_batch1  |
| IPI00219420 | Structural maintenance of chromosomes protein<br>3             | 560  | LfpYHIVDSDEVSTK                           | 27.8 | 5min_batch2  |
| IPI00219483 | Isoform 2 of U1 small nuclear<br>ribonucleoprotein 70kDa       | 126  | EFEVpYGPIKR                               | 25.3 | 15min_batch1 |
|             |                                                                | 146  | GpYAFIEYEHER                              | 37.8 | 1min_batch1  |
| IPI00219622 | Proteome subunit alpha type-2                                  | 76   | HIGLVpYSG*MGPDYR                          | 66.6 | 1min_batch2  |
|             |                                                                | 76   | HIGLVpYSGMGPDYR                           | 94.7 | 1min_batch1  |
| IPI00219757 | Bleomycin hydrolase                                            | 8    | PPYTVVpYFPVR                              | 57.4 | 1min_batch1  |
|             |                                                                | 109  | YISLlpYTNYEAGKDDYVK                       | 21.7 | 1min_batch1  |
| IPI00219798 | Isoform 1 of roundabout homolog 1                              | 932  | NGLTSTpYAGIR                              | 37.3 | 60min_batch1 |
| IPI00219852 | Isoform B of membrane cofactor protein                         | 384  | GKADGGAepYATYQTK                          | 70.8 | 60min_batch1 |
|             |                                                                | 384  | ADGGAepYATYQTK                            | 73.3 | 5min_batch1  |
|             |                                                                | 387  | ADGGAeYATpYQTK                            | 42.7 | 5min_batch2  |
| IPI00220030 | Isoform alpha of paxillin                                      | 88   | FIHQQPQSSSPVpYGSSAK                       | 59.2 | 1min_batch2  |
|             |                                                                | 88   | FIHQQPQSSpSPVpYGSSAK                      | 44.1 | 5min_batch2  |
|             |                                                                | 88   | FIHQQPQSSpSPVpYGSSAK                      | 32.7 | 15min_batch2 |
|             |                                                                | 118  | VGEEHVpYSFPNKQK                           | 49.8 | 5min_batch2  |
|             |                                                                | 118  | VGEEHVpYSFPNK                             | 54.0 | 15min_batch1 |
| IPI00220032 | Isoform 2 of catenin delta-2                                   | 292  | GGSAPEGATpYAAPR                           | 75.7 | 5min_batch1  |

|             |                                                                                       |      |                              |       |              |
|-------------|---------------------------------------------------------------------------------------|------|------------------------------|-------|--------------|
|             |                                                                                       | 424  | ALQSPFHIDPpYEDR              | 34.9  | 15min_batch1 |
|             |                                                                                       | 499  | ASYAAGPASNpYADPYR            | 59.1  | 1min_batch1  |
|             |                                                                                       | 516  | QLQYCPSVESpPpYYSK            | 34.9  | 1min_batch1  |
| IPI00220490 | Isoform 3 of SH3 and multiple ankyrin repeat domains protein 2                        | 371  | YSLDSEDLpYSR                 | 86.5  | 15min_batch1 |
|             |                                                                                       | 371  | ELDRYSLDSEDLpYSR             | 26.3  | 5min_batch2  |
|             |                                                                                       | 393  | GQ*MPENpPYSEVGK              | 52.7  | 60min_batch2 |
|             |                                                                                       | 393  | RGQ*MPENpPYSEVGK             | 44.5  | 5min_batch2  |
|             |                                                                                       | 393  | RGQMPENpPYSEVGK              | 65.6  | 5min_batch2  |
|             |                                                                                       | 393  | GQMPENpPYSEVGK               | 49.6  | 5min_batch1  |
| IPI00221067 | Isoform 2 of receptor-type tyrosine protein phosphatase alpha                         | 789  | VVQEYIDAFSDpYANFK            | 96.9  | 1min_batch1  |
| IPI00221089 | 40S ribosomal protien S13                                                             | 38   | LTSDDVKEQpYK                 | 47.0  | 60min_batch1 |
| IPI00221316 | Isoform C of protein sprouty homolog 4                                                | 52   | TSHVENDpYIDNPSLALTGPK        | 48.3  | 60min_batch1 |
| IPI00240909 |                                                                                       | 245  | YApYYDTER                    | 25.7  | 5min_batch2  |
| IPI00253050 | Line-1 type transposase domain-containing protein 1                                   | 24   | ENITpYMKR                    | 29.3  | 60min_batch1 |
| IPI00257508 | Dihydropyrimidinase-related protein 2                                                 | 499  | GLpYDGPVCEVSVTPK             | 78.8  | 5min_batch2  |
| IPI00260090 | cDNA FLJ60834, highly similar to engulfment and cell motility protein 2               | 717  | EPSSYDFVpYHYG                | 28.7  | 5min_batch2  |
|             |                                                                                       | 719  | EPSSYDFVYpYHG                | 23.4  | 1min_batch1  |
| IPI00289258 | cDNA FLJ9037, highly similar to myosin-1C                                             | 1128 | CSVGTpYNSpSGAYR              | 38.5  | 5min_batch2  |
|             |                                                                                       | 1128 | CSVGTpYNSpSGApYR             | 70.3  | 5min_batch1  |
|             |                                                                                       | 1128 | CSVGTpYNSpSGAYR              | 73.8  | 1min_batch2  |
|             |                                                                                       | 1134 | CSVGTpYNSpSGApYR             | 70.3  | 5min_batch1  |
|             |                                                                                       | 1134 | CSVGTpYNSpSGApYR             | 47.2  | 5min_batch2  |
|             |                                                                                       | 1134 | CSVGTpYNSpSGApYR             | 110.2 | 1min_batch2  |
| IPI00289329 | Ephrin type-B receptor 3                                                              | 600  | LQQpYIAPG*MK                 | 20.1  | 60min_batch2 |
|             |                                                                                       | 792  | FLEDDPSDpTpYTSSLGGK          | 92.4  | 15min_batch1 |
| IPI00289334 | Isoform 1 of filamin-B                                                                | 2502 | SSTETCpYSAIPK                | 23.4  | 5min_batch1  |
| IPI00289499 | Bifunctional purine biosynthesis protein PURH                                         | 290  | VC*MVpYDLYK                  | 33.8  | 5min_batch2  |
| IPI00289822 | Isoform RMO1AB of Ras-associated and pleckstrin homology domains-containing protein 1 | 576  | TESApYDWTSLSSSIK             | 99.8  | 1min_batch2  |
| IPI00290039 | Isoform 1 of CUB domain-containing protein 1                                          | 707  | TNKGPAVGIpYNGNINTEMPR        | 37.1  | 1min_batch1  |
|             |                                                                                       | 707  | GPAVGIpYNGNINTE*MpR          | 81.5  | 1min_batch1  |
|             |                                                                                       | 707  | GPAVGIpYNGNINTEMPR           | 52.8  | 1min_batch2  |
| IPI00290158 | Isoform 7 of serine/threonine-protein kinase MARK2                                    | 526  | DQQLPpYGVVTPASpSGHSQGR       | 60.2  | 1min_batch2  |
| IPI00290337 | Epidermal growth factor receptor kinase substrate 8                                   | 527  | HIDRNpYEPLK                  | 27.6  | 60min_batch1 |
| IPI00291175 | Isoform 1 of vinculin                                                                 | 692  | NPGNQAApYEHFET*MK            | 61.7  | 15min_batch2 |
|             |                                                                                       | 692  | NPGNQAApYEHFETMK             | 70.7  | 15min_batch1 |
|             |                                                                                       | 822  | SFLDpGpYR                    | 38.8  | 60min_batch2 |
| IPI00291802 | Isoform 3 of LIM domain only protein 7                                                | 185  | KAQSNpPYNGPHLNLK             | 35.0  | 5min_batch2  |
|             |                                                                                       | 186  | AQSNpPYNGPHLNLK              | 26.7  | 5min_batch2  |
| IPI00291939 | Structural maintenance of chromosomes protein 1A                                      | 186  | AEEDTQFNpYHR                 | 29.1  | 5min_batch2  |
|             |                                                                                       | 714  | LKpYQSQDLEQTK                | 60.0  | 5min_batch2  |
| IPI00292856 | Isoform long of E3 ubiquitin-protein ligase CBL-B                                     | 889  | TSQDpYDQLPSCSDGSQAPARPPKPRPR | 31.2  | 60min_batch1 |
| IPI00293126 | Tubulin-folding cofactor E                                                            | 98   | LGEpYEDVSR                   | 57.0  | 5min_batch1  |
| IPI00293451 | Tight junction protein ZO-3                                                           | 364  | ESSYDpYRVPSSQs*MEDR          | 45.9  | 1min_batch1  |
|             |                                                                                       | 364  | ESSYDpYRVPSSQsMEDR           | 54.5  | 1min_batch1  |
| IPI00293655 | ATP-dependent RNA helicase DDX1                                                       | 628  | VWpYHVCSSR                   | 32.3  | 5min_batch2  |
| IPI00294250 | Ephrin type-A receptor 1                                                              | 781  | LLDDFDGTpYETQGGK             | 76.9  | 1min_batch1  |
|             |                                                                                       |      | LLDDFDGTpYETQGGKIPIR         | 54.1  | 60min_batch1 |
| IPI00295698 | Cationic amino acid transporter 3                                                     | 615  | TVDLDPGTLpYVHSV              | 51.5  | 1min_batch1  |
| IPI00296114 | Large neutral amino acids transported small subunit 2                                 | 519  | GSGTEEANEDMEEQQP*MpYQPTPTK   | 59.5  | 1min_batch1  |
|             |                                                                                       | 519  | GSGTEEANEDMEEQQPMpYQPTPTK    | 73.6  | 1min_batch1  |
|             |                                                                                       | 519  | GSGTEEANED*MEEQQP*MpYQPTPTK  | 41.3  | 5min_batch2  |
| IPI00296283 | Mitogen-activated protein kinase 12                                                   | 185  | QADSEMTGpYVVTR               | 60.7  | 5min_batch1  |
|             |                                                                                       | 185  | QADSE*MTGpYVVTR              | 49.7  | 60min_batch2 |
|             |                                                                                       | 185  | QADSE*MpTgYVVTR              | 20.2  | 5min_batch1  |
| IPI00296784 | Isoform 1 of marvel domain-containing protein 2                                       | 23   | RYDEVPsDLpYQDTTIR            | 40.3  | 1min_batch1  |
| IPI00296913 | APD-sugar pyrophosphatase                                                             | 74   | TLHpYECIVLVK                 | 36.8  | 1min_batch1  |
| IPI00296992 | Isoform long of tyrosine-protein kinase receptor UFO                                  | 702  | IYNGDpYYR                    | 38.2  | 5min_batch1  |
|             |                                                                                       | 702  | KIYNGDpYYR                   | 43.5  | 1min_batch2  |
|             |                                                                                       | 702  | IYNGDpYpYR                   | 25.5  | 5min_batch2  |

|             |                                                                   |      |                                |       |              |
|-------------|-------------------------------------------------------------------|------|--------------------------------|-------|--------------|
|             |                                                                   | 702  | KIYNGDpYpYR                    | 27.0  | 5min_batch1  |
|             |                                                                   | 703  | IYNGDpYpYR                     | 25.5  | 5min_batch2  |
|             |                                                                   | 703  | KIYNGDpYpYR                    | 38.1  | 5min_batch1  |
|             |                                                                   | 703  | KIYNGDpYpYR                    | 27.0  | 5min_batch1  |
| IPI00298285 | Isoform 1 of receptor tyrosine-protein kinase ERBB-3              | 1276 | DGGGPGGDpYAA*MGACPASEQGpYEE*MR | 33.7  | 60min_batch2 |
|             |                                                                   | 1289 | DGGGPGGDYAA*MGACPASEQGpYEE*MR  | 82.6  | 1min_batch1  |
|             |                                                                   | 1289 | DGGGPGGDYAA*MGACPASEQGpYEE*MR  | 81.9  | 1min_batch1  |
|             |                                                                   | 1289 | DGGGPGGDpYAA*MGACPASEOGpYEE    | 33.7  | 60min_batch2 |
|             |                                                                   | 1307 | AFQGPQHQAAPHVHpYAR             | 33.5  | 5min_batch2  |
|             |                                                                   | 1328 | SLEATDSAFDNPDPYWHSR            | 93.0  | 60min_batch1 |
| IPI00298347 | Isoform 2 of tyrosine-protein phosphatase non-receptor type 11    | 62   | IQNTGDPY YDLYGGEK              | 104.2 | 15min_batch1 |
|             |                                                                   | 580  | VpYENVGLMQQQK                  | 56.7  | 60min_batch1 |
|             |                                                                   | 580  | VpYENVGL*MQQQK                 | 67.9  | 5min_batch2  |
| IPI00298625 | Isoform LYN A of tyrosine-protein kinase LYN                      | 193  | SLDNNGGpYYISPR                 | 54.9  | 5min_batch2  |
|             |                                                                   | 194  | SLDNNGGpYISPR                  | 66.4  | 60min_batch1 |
| IPI00298860 | cDNA FLJ8440, highly similar to human lactoferrin                 | 546  | YpGYGTGAFR                     | 42.8  | 5min_batch1  |
|             |                                                                   | 548  | YYGpYGTGAFR                    | 34.0  | 5min_batch1  |
| IPI00298994 | Talin-1                                                           | 26   | TMQFEPSTMVpYDACR               | 83.9  | 1min_batch1  |
|             |                                                                   | 26   | T*MQFEPST*MVpYDACR             | 76.3  | 1min_batch1  |
|             |                                                                   | 26   | T*MQFEPSTMVpYDACR              | 98.3  | 15min_batch1 |
|             |                                                                   | 70   | ALDpYYMLR                      | 43.7  | 1min_batch2  |
|             |                                                                   | 70   | ALDpYY*MLR                     | 28.3  | 5min_batch2  |
|             |                                                                   | 71   | ALDpYYMLR                      | 23.3  | 1min_batch1  |
| IPI00299588 | ARGBPIB protein                                                   | 157  | HTPPTIGGSLPpYR                 | 44.9  | 1min_batch1  |
| IPI00299699 | Neural proliferation differentiation and control protein 1        | 249  | LAQSAE*MpYHYQHQR               | 34.5  | 5min_batch2  |
| IPI00299904 | Isoform 1 of DNA replication licensing factor MCM7                | 492  | CSILAAANPApYGR                 | 21.2  | 1min_batch1  |
| IPI00299977 | 14kDa phosphohistidine phosphatase                                | 125  | AKYPDYEVTVWANDGpY              | 71.3  | 1min_batch1  |
| IPI00300384 | Receptor tyrosine-protein kinase ERBB-2                           | 877  | LLDIDETE pYHADGGK              | 75.7  | 5min_batch2  |
|             |                                                                   | 877  | LLDIDETE pYHADGGKVPIK          | 66.5  | 5min_batch2  |
| IPI00301058 | Vasodilator-stimulated phosphoprotein                             | 39   | VQIpYHNPTANSFR                 | 73.7  | 15min_batch2 |
| IPI00301561 | Thyroid receptor-interacting protein 6                            | 55   | VNFCPLPSEQCpYQAPGGPEDR         | 34.4  | 15min_batch1 |
|             |                                                                   | 123  | QApYEPppPPpAYR                 | 42.1  | 5min_batch2  |
|             |                                                                   | 131  | QAYEPppPPpApYR                 | 42.5  | 15min_batch1 |
| IPI00301987 | Isoform 1 of WD repeat-containing protein MIO                     | 235  | *MFVNTKAVQGVpTVDPpYFHDR        | 28.1  | 1min_batch1  |
| IPI00302690 | Actin-related protein 10                                          | 4    | PLpYEGLGSGGEK                  | 31.9  | 5min_batch2  |
| IPI00302925 | 59kDa protein                                                     | 30   | HFSGLEEAVpYR                   | 51.2  | 15min_batch1 |
| IPI00305610 | Scavenger receptor class F member 2                               | 623  | SASSVEPGGALpYAR                | 65.8  | 5min_batch2  |
| IPI00306436 | Isoform del-701 of signal transducer activator of transcription 3 | 704  | YCRPESQEHPEADPGAAPpYLK         | 38.8  | 15min_batch1 |
| IPI00307545 | Tensin-1                                                          | 796  | SYSPPYDYQPCLAGPNQDFHSK         | 52.1  | 1min_batch1  |
|             |                                                                   | 798  | SYSPPYDpYQPCLAGPNQDFHSK        | 48.9  | 15min_batch1 |
|             |                                                                   | 903  | AASDGQpYENQSPEATSPR            | 47.5  | 5min_batch2  |
|             |                                                                   | 1254 | HPAGVpYQVSGLHNK                | 36.8  | 5min_batch1  |
|             |                                                                   | 1323 | HVApYGGpYSTPEDR                | 61.9  | 5min_batch2  |
|             |                                                                   | 1323 | HVApYGGYSTPEDR                 | 39.7  | 0min_batch1  |
|             |                                                                   | 1326 | HVApYGGpYSTPEDR                | 61.9  | 5min_batch2  |
|             |                                                                   | 1326 | HVA YGGpYSTPEDR                | 80.5  | 60min_batch1 |
|             |                                                                   | 1404 | AGSLPNpYATINGK                 | 31.8  | 5min_batch1  |
| IPI00307829 | Isoform 1 of cingulin-like protein 1                              | 108  | ENSEELQLPENPpYAQPSPiR          | 73.6  | 1min_batch2  |
| IPI00328180 | Isoform 1 of Ras-related protein Rab-34                           | 247  | INSDSNLpYLTASK                 | 59.2  | 5min_batch1  |
| IPI00328218 | Isoform 2 of lipolysis-stimulated lipoprotein receptor            | 272  | CPCCPKKCCPEALpYAAGK            | 43.2  | 1min_batch1  |
|             |                                                                   | 272  | CCCPEALpYAAGK                  | 60.9  | 5min_batch1  |
|             |                                                                   | 286  | AATSGVPSIpYAPSTY AHLpSPAK      | 53.5  | 15min_batch1 |
|             |                                                                   | 286  | AATSGVPSIpYAPSTpY AHLSPAK      | 40.1  | 5min_batch2  |
|             |                                                                   | 286  | AATSGVPSIpYAPSTY AHLSPAK       | 42.6  | 1min_batch1  |
|             |                                                                   | 291  | AATSGVPSIpYAPSTpY AHLSPAK      | 40.1  | 5min_batch2  |
|             |                                                                   | 348  | VLpYY*MEK                      | 24.9  | 5min_batch2  |
|             |                                                                   | 493  | DPHpYDDFR                      | 20.4  | 5min_batch1  |
|             |                                                                   | 493  | SRDPHpYDDFR                    | 47.5  | 15min_batch2 |
|             |                                                                   | 528  | SGDLPpYDGR                     | 22.4  | 60min_batch2 |
| IPI00328587 |                                                                   | 44   | AAVPSGASTGIpYEVLELQDNNDK       | 32.4  | 1min_batch1  |
| IPI00328737 | Isoform 1 of zinc finger protein 598                              | 306  | RNEGVVGGEDpYEEVDR              | 78.5  | 5min_batch2  |
| IPI00328825 | Isoform 1 of NEDD4-binding protein 2                              | 599  | IELCApYSCEDR                   | 56.9  | 1min_batch1  |
| IPI00329027 | P2Y purinoceptor 8                                                | 272  | LFYGKSYpYHVYK                  | 23.6  | 1min_batch2  |
| IPI00329033 | Protein kinase C delta type                                       | 90   | IQEpYIIAFAKEK                  | 23.9  | 60min_batch1 |
| IPI00329236 | Fasler syndrome 1 protein isoform precursor                       | 313  | SDSASSEPVGIpYQGFEK             | 77.3  | 15min_batch2 |

|             |                                                                                           |      |                                    |       |              |
|-------------|-------------------------------------------------------------------------------------------|------|------------------------------------|-------|--------------|
|             |                                                                                           | 313  | RSDSASSEPVGIpYQGFKEK               | 99.8  | 1min_batch1  |
|             |                                                                                           | 334  | TGVAGED*MQDNSGTpYgk                | 35.4  | 5min_batch2  |
| IPI00329327 | Faser syndrome 1 protein isoform 1 precursor                                              | 3986 | NVNILSEPEAApYTFK                   | 55.6  | 15min_batch1 |
| IPI00329488 | Isoform 1B of tyrosine-protein kinase ABL2                                                | 718  | CpYGGsFAQR                         | 26.8  | 5min_batch1  |
| IPI00329526 | Cell division cycle protein 20 homolog                                                    | 152  | VLpYSQKApTPGSSR                    | 35.4  | 60min_batch1 |
| IPI00329672 | Myosin-IE                                                                                 | 7    | GVpYQYHWQSHNVK                     | 24.0  | 15min_batch1 |
|             |                                                                                           | 990  | SLpYTS*MARPPPLR                    | 28.4  | 5min_batch2  |
|             |                                                                                           | 990  | SLpYTSMARPPPLR                     | 44.4  | 1min_batch1  |
| IPI00329801 | Annexin A5                                                                                | 94   | LYDApYELKHALK                      | 28.4  | 1min_batch1  |
| IPI00332841 | Guanine nucleotide-releasing factor 2 isoform B                                           | 347  | QDFDVCpY AQR                       | 61.7  | 60min_batch1 |
| IPI00334294 | Isoform 1 of RHO/CDC42/RAC GTPase activating protein RICS                                 | 1188 | YNTpYVAPGR                         | 48.8  | 5min_batch1  |
|             |                                                                                           | 1353 | SLpYSYAGLAPRPR                     | 33.6  | 5min_batch2  |
| IPI00334627 | Putative annexin A2-like protein                                                          | 24   | LSLEGDHSTPPSApYGSVK                | 57.5  | 1min_batch1  |
|             |                                                                                           | 30   | ApYTNFDAER                         | 62.5  | 5min_batch2  |
| IPI00334715 | Isoform 1 of glucocorticoid receptor DNA-binding factor 1                                 | 1087 | SVSSSPWLPQDGFDPSPdY AEPMDAVV KPR   | 50.4  | 15min_batch2 |
|             |                                                                                           | 1087 | SVSSSPWLPQDGFDPSPdY AEP*MDAVV KPR  | 53.0  | 15min_batch2 |
|             |                                                                                           | 1105 | NEEENIpYSVPHDSTQGK                 | 78.8  | 0min_batch1  |
| IPI00335824 | Isoform short of tight junction protein ZO-1                                              | 923  | IDSPGFKPASQQVpYR                   | 39.8  | 1min_batch1  |
|             |                                                                                           | 923  | IDpSPGFKPASQQVpYR                  | 26.7  | 0min_batch1  |
| IPI00337612 | Discoidin, CUB and LCCL domain-containing protein 1                                       | 578  | GSTFRPMDTDAEEAGVSTDAGGHpYDC PQR    | 45.1  | 1min_batch1  |
|             |                                                                                           | 578  | GSTFRPMDTDAEEAGVSTDAGGHpYDC PQR    | 57.1  | 1min_batch1  |
|             |                                                                                           | 578  | KGSTFRP*MDTDAEEAGVSTDAGGHpY DCPQR  | 60.8  | 1min_batch1  |
|             |                                                                                           | 578  | KGSTFRP*MDTDAEEAGVSTDAGGHpY DCPQR  | 62.6  | 1min_batch1  |
|             |                                                                                           | 621  | AHTFSAQSGpYR VPGPQPGHK             | 27.4  | 1min_batch2  |
|             |                                                                                           |      | AHTFSAQSGpYR                       | 60.1  | 15min_batch2 |
|             |                                                                                           | 652  | HSLSSGGFSPVAGVGAQDGDpYQRPHS AQPADR | 54.1  | 15min_batch1 |
|             |                                                                                           | 696  | AVSALATESGHPDSQKPPHTPGTSDSpY SAPR  | 30.3  | 15min_batch2 |
| IPI00374301 | Isoform 1 of uncharacterized protein C6ORF132                                             | 894  | HKAPGSADpYGFAPAAGR                 | 47.8  | 5min_batch2  |
| IPI00376221 | Isoform 1 of band 4.1-like protein 5                                                      | 499  | LPGLGEPEVEpYETLKDTSEK              | 33.4  | 1min_batch1  |
| IPI00376229 | Isoform 1 of phosphofurin acidic cluster sorting protein 1                                | 251  | IpYSLSSQPIDHEGIK                   | 33.9  | 1min_batch1  |
| IPI00376306 | Isoform 2 of membrane-associated guanylate kinase, WW and PDZ domain-containing protein 2 | 362  | IDDPpYGTYYVDHINR                   | 57.8  | 5min_batch2  |
|             |                                                                                           | 362  | IDDPpYGTYYVDHINRR                  | 54.2  | 5min_batch2  |
| IPI00376955 | Serine/Threonine-protein kinase PCTAIRE-2                                                 | 203  | LGEGpTpYATVYK                      | 22.0  | 15min_batch1 |
| IPI00382470 | Isoform of heat shock protein HSP 90-alpha                                                | 614  | HIpYYITGETK                        | 45.2  | 60min_batch1 |
| IPI00382749 | Ribosomal protein L15                                                                     | 59   | QGpYVIYR                           | 22.1  | 5min_batch1  |
| IPI00382946 | CCDC123 protein                                                                           | 128  | GGHSDDLpYAVPHR                     | 58.2  | 5min_batch2  |
| IPI00383423 | Isoform of coiled-coil domain-containing protein 50                                       | 145  | AYADSYpYYEDGG*MKPR                 | 39.9  | 5min_batch2  |
|             |                                                                                           | 145  | AYADSYpYYEDGGMKPR                  | 74.2  | 15min_batch1 |
|             |                                                                                           | 146  | AYADSYpYEDGG*MKPR                  | 22.8  | 1min_batch1  |
| IPI00384529 | Isoform of protein cordon-bleu                                                            | 867  | TSSQpYVASAIK                       | 23.3  | 0min_batch1  |
| IPI00384861 | Isoform 1 of ARF GTPase-activating protein GIT1                                           | 545  | LQPFHSTLEDDAIpYSVHVPAglyR          | 47.2  | 1min_batch1  |
| IPI00385317 | Isoform 2 of tensin-like C1 domain-containing phosphatase                                 | 483  | GPLDGSppYAQVQRPPR                  | 22.6  | 1min_batch1  |
| IPI00394952 | cDNA FLJ56184, highly similar to proto-oncogene tyrosine-protein kinase LCK               | 192  | NLDNGGFpYISPR                      | 73.0  | 15min_batch1 |
|             |                                                                                           | 505  | SVLEFFTATEGQpYQPQP                 | 100.5 | 0min_batch2  |
| IPI00395663 | Ankyrin repeat and SAM domain-containing protein 1A                                       | 455  | EEDEHPpYELLTAETK                   | 37.0  | 15min_batch2 |
|             |                                                                                           | 455  | EEDEHPpYELLTAETKK                  | 27.6  | 1min_batch2  |
|             |                                                                                           | 834  | IIASLADRppYEEPPQKPPR               | 49.2  | 1min_batch1  |
| IPI00395903 | Transmembrane protein 106B                                                                | 50   | NGDVSQFPpYVEFTGR                   | 61.3  | 1min_batch1  |
| IPI00396130 | Isoform 2 of P130CAS-associated protein                                                   | 456  | GEGlpYADPYGLLHEGR                  | 77.1  | 1min_batch1  |
|             |                                                                                           | 522  | AAGGGGpLYGDGYGFR                   | 52.4  | 5min_batch2  |
| IPI00396378 | Isoform B1 of heterogenous nuclear ribonucleoproteins A2/B1                               | 331  | NMGGPpYGGGNYGPGSGSGGGYGG R         | 72.0  | 1min_batch1  |
|             |                                                                                           | 331  | N*MGGPpYGGGNYGPGSGSGGGYGG R        | 129.3 | 5min_batch2  |
|             |                                                                                           | 336  | NMGGPYGGGnpYGPGSGSGGGYGG R         | 96.0  | 1min_batch1  |
|             |                                                                                           | 336  | N*MGGPYGGGnpYGPGSGSGGGYGG R        | 110.1 | 5min_batch2  |

|             |                                                                            |      |                                                  |       |              |
|-------------|----------------------------------------------------------------------------|------|--------------------------------------------------|-------|--------------|
|             |                                                                            | 347  | NMGPPYGGGNYGPGSGSGGpYGGRR                        | 110.0 | 15min_batch1 |
| IPI00396435 | Putative pre-mRNA-splicing factor ATP-dependent RNA helicase DHX15         | 13   | HRLDLGEDpYPSGK                                   | 59.8  | 15min_batch2 |
| IPI00396634 | Isoform 1 of uncharacterized protein KIAA1671                              | 1032 | ATFFFAVTPYQIPNTQK                                | 66.4  | 1min_batch1  |
| IPI00397526 | Isoform 1 of myosin-1C                                                     | 22   | AVIpYNPATQADWTAK                                 | 69.6  | 1min_batch1  |
|             |                                                                            | 1415 | ALApYDKLEK                                       | 40.0  | 5min_batch1  |
| IPI00409640 | Isoform 1 of lipolysis-stimulated lipoprotein receptor                     | 372  | SSSAGGQGSpYVPLLR                                 | 54.1  | 5min_batch1  |
| IPI00410034 | Isoform 1 of sodium-coupled neutral amino acid transporter 2               | 20   | FSISPEDESSSpYSSNSDFNYSYPTK                       | 76.3  | 1min_batch1  |
|             |                                                                            | 28   | FSISPEDESSSYSSNSDFNpYSYPTK                       | 78.5  | 15min_batch1 |
|             |                                                                            | 41   | SHpYADVDPENQNFLLESNLGK                           | 83.4  | 1min_batch1  |
| IPI00410693 | Isoform 1 of plasminogen activator inhibitor 1 RNA-binding protein         | 207  | SSFShpYSGLK                                      | 32.8  | 5min_batch2  |
| IPI00411452 | Putative uncharacterized protein DOCK11                                    | 1223 | GSLSTDKDTApYGSFQNGHGK                            | 25.4  | 1min_batch1  |
| IPI00411901 | Isoform 1 of disks large homolog 5                                         | 1197 | NPIpYTVR                                         | 24.7  | 5min_batch2  |
| IPI00412752 | Signal transducer and activator of transcription 3 isoform 3               | 705  | YCRPESQEHPEADPGSAAPpYLK                          | 54.0  | 5min_batch2  |
| IPI00412771 | CD2-associated protein                                                     | 541  | DTCpYSPKPSVYLSTPSSASK                            | 35.0  | 1min_batch1  |
| IPI00413641 | Aldose reductase                                                           | 190  | YKPAVNQIECHPpYLTOEK                              | 27.2  | 1min_batch1  |
| IPI00414123 | Dihydropyrimidinase-related protein 1                                      | 504  | GMYDGPVpYEVpATPK                                 | 71.8  | 15min_batch1 |
|             |                                                                            | 504  | G*MYDGPVpYEVpATPK                                | 68.4  | 1min_batch2  |
| IPI00414676 | Heat shock protein HSP 90-beta                                             | 484  | SIpYYITGESK                                      | 41.3  | 0min_batch1  |
|             |                                                                            | 485  | SIYpYITGESK                                      | 28.1  | 1min_batch2  |
|             |                                                                            | 596  | LVSSPCCIVTSTpYGWtan*MER                          | 60.5  | 1min_batch1  |
| IPI00418471 | Vimentin                                                                   | 53   | SLpYASSPGGVYATR                                  | 73.1  | 1min_batch1  |
|             |                                                                            | 61   | SLYASSPGGVpYATR                                  | 51.2  | 1min_batch2  |
| IPI00418545 | Isoform 2 of RHO guanine nucleotide exchange factor 5                      | 292  | RTEELIpYLSQK                                     | 37.2  | 5min_batch2  |
| IPI00419100 | Isoform 1 of FYVE, RHOGEF and PH domain-containing protein 6               | 748  | SVTSLCAPEpYENIR                                  | 40.2  | 15min_batch1 |
|             |                                                                            | 760  | HYEIEpYENLPFI*MAIR                               | 38.1  | 5min_batch2  |
| IPI00419373 | Isoform 1 of heterogenous nuclear ribonucleoprotein A3                     | 360  | SSGSPpYGGGYSGGGSGGYGSR                           | 111.4 | 60min_batch2 |
|             |                                                                            | 364  | SSGSPYGGGpYSGGGSGGYGSR                           | 83.4  | 5min_batch1  |
|             |                                                                            | 373  | SSGSPYGGGYSGGGSGGpYGSR                           | 118.0 | 5min_batch2  |
| IPI00419836 | Isoform 1 of discoidin, CUB and LCCL domain-containing protein 2           | 565  | TEGTpYDLPYWDR                                    | 39.1  | 5min_batch2  |
|             |                                                                            | 732  | TDCSSAQApYDTPK                                   | 66.1  | 60min_batch2 |
|             |                                                                            | 750  | AGKPGLPAPDELVpYQVPQSTQEVSGAGR                    | 53.4  | 1min_batch1  |
| IPI00419933 | Isoform 1 of pleckstrin homology domain-containing family A member 7       | 656  | SADDTpYLQLKK                                     | 42.6  | 5min_batch2  |
|             |                                                                            | 665  | DLEpYLDLK                                        | 33.9  | 5min_batch2  |
| IPI00431025 | Isoform 1 of ABL interactor 1                                              | 213  | TLEPVKPPTPVNDpYMTSPAR                            | 30.5  | 1min_batch1  |
|             |                                                                            | 213  | TLEPVKPPTPVNDpY*MTSPAR                           | 49.1  | 5min_batch2  |
| IPI00435208 | Isoform 1 of connector enhancer of kinase suppressor Ras 2                 | 821  | CHLQDHpYGPYPLAESER                               | 43.8  | 1min_batch1  |
| IPI00435947 | Isoform 1 of WAS/WASL-interacting protein family member 2                  | 74   | GSSGpYGSAGALQPK                                  | 52.2  | 60min_batch1 |
|             |                                                                            | 346  | DAPPPPPpYR                                       | 28.0  | 5min_batch2  |
| IPI00438229 | Isoform 1 of transcription intermediary factor 1-beta                      | 458  | QGSSSQP*MEVQEGYFGSGDDPpYSSAEPHVSGVK              | 69.3  | 5min_batch2  |
| IPI00438286 | ERBB2IP protein                                                            | 1104 | RAQIEGDpYLSYR                                    | 49.2  | 15min_batch1 |
|             |                                                                            | 1104 | AQIEGDpYLSYR                                     | 61.2  | 15min_batch2 |
| IPI00440932 | Isoform 1 of disintegrin and metalloproteinase domain-containing protein 5 | 769  | HVSPVpTPPREVPpYANR                               | 46.2  | 1min_batch1  |
| IPI00442025 | Isoform 3 of activated CDC42 kinase 1                                      | 937  | VSSThpYLLPERPSYLER                               | 32.6  | 1min_batch2  |
| IPI00442210 | Isoform 1 of ABL interactor 2                                              | 213  | TLEPVRPPVPNDpYVSPTR                              | 28.7  | 1min_batch1  |
| IPI00444262 | cDNA FLJ45706 FIS, clone FEBRA2028457, highly similar to nucleolin         | 295  | NLPpYKVTQDELK                                    | 67.9  | 1min_batch2  |
| IPI00453473 | Histone H4                                                                 | 52   | ISGLIpYEETR                                      | 51.6  | 60min_batch1 |
| IPI00453476 | 29kDa protein                                                              | 26   | FSGWpYDADLSPAGHEEAK                              | 51.4  | 5min_batch2  |
|             |                                                                            | 26   | FSGWpYDADLSPAGHEEAKR                             | 77.4  | 1min_batch1  |
| IPI00455851 | KIAA1688 protein                                                           | 448  | SGDpYST*MEGPELR                                  | 58.0  | 5min_batch1  |
| IPI00464978 | Insulin receptor substrate 2 insertion mutant (fragment)                   | 186  | AAAGDAPPAAPAASCSASLPGALGGSAGAAGAEDSpYGLVAPATAAYR | 75.4  | 60min_batch2 |
|             |                                                                            | 542  | DGGGGGEFpYGpY*MT*MDRPLSHCGR                      | 36.7  | 5min_batch2  |
|             |                                                                            | 544  | DGGGGGEFpYGpY*MT*MDRPLSHCGR                      | 36.7  | 5min_batch2  |
|             |                                                                            | 544  | DGGGGGEFYGpY*MT*MDRPLSHCGR                       | 64.5  | 1min_batch1  |
|             |                                                                            | 544  | DGGGGGEFYGpYMT*MDRPLSHCGR                        | 87.5  | 15min_batch1 |



|             |                                                                                      |      |                                       |       |              |
|-------------|--------------------------------------------------------------------------------------|------|---------------------------------------|-------|--------------|
|             |                                                                                      | 544  | DGGGGGEFYGpYMTMDRPLSHCGR              | 73.3  | 15min_batch1 |
|             |                                                                                      | 544  | DGGGGGEFYGpY*MTMDRPLSHCGR             | 59.7  | 15min_batch2 |
|             |                                                                                      | 600  | QRPVQPSSASLDEpYTLMR                   | 60.8  | 15min_batch1 |
|             |                                                                                      | 600  | QRPVQPSSASLDEpYTL*MR                  | 77.6  | 15min_batch2 |
|             |                                                                                      | 634  | VAYHPYPEDpYGDIEIGSHR                  | 78.1  | 5min_batch2  |
|             |                                                                                      | 655  | SSSNLGAADDGpYMP*MTPGAALAGSG<br>SGSCR  | 116.1 | 60min_batch1 |
|             |                                                                                      | 655  | SSSNLGAADDGpY*MP*MTPGAALAGSG<br>SGSCR | 96.6  | 5min_batch1  |
|             |                                                                                      | 655  | SSSNLGAADDGpYMPMTPGAALAGSG<br>GSCR    | 97.2  | 1min_batch1  |
|             |                                                                                      | 655  | SSSNLGAADDGpY*MPMTPGAALAGSG<br>SGSCR  | 83.0  | 1min_batch2  |
|             |                                                                                      | 677  | SDDpYMPMPASVSAPK                      | 105.6 | 1min_batch1  |
|             |                                                                                      | 677  | SDDpYMP*MSPASVSAPK                    | 72.9  | 60min_batch1 |
|             |                                                                                      | 677  | SDDpY*MPMPASVSAPK                     | 58.5  | 60min_batch1 |
|             |                                                                                      | 677  | SDDpY*MP*MSPASVSAPK                   | 72.8  | 5min_batch1  |
|             |                                                                                      | 744  | ASSPAESSPEDSGpY*MR                    | 80.1  | 5min_batch2  |
|             |                                                                                      | 744  | ASSPAESSPEDSGpYMR                     | 85.7  | 1min_batch2  |
|             |                                                                                      | 744  | ASSPAESpSPEDSGpYMR                    | 60.2  | 1min_batch2  |
|             |                                                                                      | 744  | ASSPAESpSPEDSGpY*MR                   | 57.2  | 60min_batch1 |
|             |                                                                                      | 744  | ASpSPAESSPEDSGpYMR                    | 42.5  | 60min_batch1 |
|             |                                                                                      | 744  | ASpSPAESSPEDSGpY*MR                   | 35.5  | 5min_batch1  |
|             |                                                                                      | 816  | APpYTCGGSDQpYVL*MSSPVGR               | 31.2  | 5min_batch2  |
|             |                                                                                      | 825  | SYKAPYTCGGSDQpYVLMSSPVGR              | 39.1  | 15min_batch1 |
|             |                                                                                      | 825  | APYTCGGSDQpYVL*MSSPVGR                | 74.8  | 1min_batch2  |
|             |                                                                                      | 825  | APYTCGGSDQpYVLMSSPVGR                 | 98.2  | 15min_batch2 |
|             |                                                                                      | 825  | SYKAPYTCGGSDQpYVL*MSSPVGR             | 58.9  | 1min_batch1  |
|             |                                                                                      | 980  | SPLSDpY*MNLDFSSPK                     | 68.1  | 5min_batch1  |
| IPI00470360 | Isoform 1 of kin of IRRE-like protein 1                                              | 572  | AlpYSSFKDDVDLK                        | 78.4  | 15min_batch1 |
|             |                                                                                      | 605  | EEYE*MKDPTNGpYYNVR                    | 41.4  | 1min_batch1  |
|             |                                                                                      | 606  | EEYEMKDPTNGpYYNVR                     | 44.6  | 1min_batch1  |
|             |                                                                                      | 622  | AVLpYADYR                             | 27.2  | 5min_batch1  |
|             |                                                                                      | 721  | TPpYEAyDPIGK                          | 44.4  | 60min_batch1 |
|             |                                                                                      | 724  | TPYEApYDPIGK                          | 40.8  | 0min_batch1  |
|             |                                                                                      | 745  | FSYTSQHSDpYGQR                        | 39.1  | 5min_batch2  |
| IPI00470838 | Isoform 1 of DENN domain-containing protein<br>2C                                    | 195  | SLENIpYSEPEGEQCGPSINLPKPR             | 30.4  | 5min_batch2  |
| IPI00478817 | Isoform 2 of RHO guanine nucleotide exchange<br>factor 10-like protein               | 152  | NLLpYEDAHR                            | 35.5  | 60min_batch2 |
| IPI00478892 | Leucine-rich repeats and immunoglobulin-like<br>domains protein 2                    | 912  | VICSDCYDNANIpYSR                      | 82.1  | 15min_batch1 |
| IPI00552750 | Activated CDC42 kinase 1                                                             | 574  | KPTpYDpVSEDQDPLSSDFK                  | 50.0  | 1min_batch1  |
|             |                                                                                      | 574  | KPTpYDpVSEDQDPLSSDFKR                 | 75.7  | 1min_batch1  |
| IPI00554648 | Keratin, type II cytoskeletal 8                                                      | 25   | AFSSRpSpYTSQPGSR                      | 28.6  | 5min_batch2  |
| IPI00554711 | Junction plakoglobin                                                                 | 20   | VTEWQQTpYTYDSGIHSGANTCVPSVSS<br>K     | 81.0  | 15min_batch1 |
|             |                                                                                      | 549  | HVAAGTQQPpYTDGVR                      | 46.2  | 60min_batch1 |
| IPI00641339 | cDNA FLJ55515, highly similar to breast<br>cancer anti-estrogen resistance protein 1 | 306  | GLPPSNHHApYDVPPSVSK                   | 37.4  | 15min_batch1 |
|             |                                                                                      | 387  | RPGPGTLpYDVPR                         | 45.2  | 60min_batch1 |
| IPI00643785 | Myeloid/Lymphoid or mixed-lineage leukemia:<br>1                                     | 76   | YSLpYEVHVSGEER                        | 46.0  | 1min_batch1  |
| IPI00644231 | Isoform 1 of cytoplasmic FMR1-interacting<br>protein 1                               | 108  | CNEQPNRVEIpYEK                        | 37.7  | 60min_batch2 |
| IPI00644865 | FERM domain-containing protein 4A                                                    | 861  | SLESDQEGHpYSVK                        | 26.3  | 5min_batch2  |
| IPI00654623 | Isoform 2 of tensin-3                                                                | 114  | WDpSYENLSADGEVLHTQGPVDGSLpY<br>AK     | 58.2  | 1min_batch1  |
|             |                                                                                      | 361  | QQQMVAHQpYSFAPDGEAR                   | 29.2  | 1min_batch1  |
|             |                                                                                      | 361  | QQQ*MVVAHQpYSFAPDGEAR                 | 32.9  | 5min_batch1  |
|             |                                                                                      | 540  | LSLQpYDNDAGGQLPFSK                    | 90.0  | 1min_batch1  |
|             |                                                                                      | 540  | KLSLQpYDNDAGGQLPFSK                   | 74.7  | 15min_batch1 |
|             |                                                                                      | 615  | ES*MCSTPAFPVSPETpYVK                  | 47.5  | 5min_batch2  |
|             |                                                                                      | 615  | ESMCSTPAFPVSPETpYVK                   | 49.2  | 1min_batch1  |
| IPI00737545 | Tyrosine-protein kinase SGK269                                                       | 387  | EIEPNpYESPSSNNQDKDSSQASK              | 48.6  | 60min_batch2 |
|             |                                                                                      | 462  | ASTDVAGQAVTINLVPTEEQAQpYR             | 96.5  | 1min_batch1  |
|             |                                                                                      | 616  | FNSYNNAG*MPPFPPIIHDEPTpYAR            | 80.0  | 1min_batch1  |
|             |                                                                                      | 635  | NAIKVPIVINPNApYDNLAIYK                | 30.4  | 1min_batch1  |
|             |                                                                                      | 635  | VPIVINPNApYDNLAIYK                    | 90.8  | 1min_batch1  |
|             |                                                                                      | 635  | VPIVINPNApYDNLAIpYK                   | 31.1  | 15min_batch2 |
|             |                                                                                      | 641  | VPIVINPNApYDNLAIpYK                   | 31.1  | 15min_batch2 |
|             |                                                                                      | 797  | ACpSVEELpYAIPDADVAK                   | 56.5  | 1min_batch1  |
|             |                                                                                      | 880  | STSSPpYHAGNLLQR                       | 55.9  | 5min_batch2  |
|             |                                                                                      | 1107 | EDGKEDISDP*MDPNPCSApYSNLGQS<br>R      | 67.8  | 5min_batch2  |
| IPI00739386 | Tyrosine-protein kinase SGK223                                                       | 132  | QEDAPVpYLGsFR                         | 58.2  | 1min_batch1  |

|             |                                                          |      |                                |      |              |
|-------------|----------------------------------------------------------|------|--------------------------------|------|--------------|
|             |                                                          | 197  | EKPSFPpYQDRPSTQESFR            | 21.5 | 15min_batch1 |
|             |                                                          | 253  | CSPSGDSEGGEpYCSILDCCPGSPVAK    | 67.5 | 15min_batch1 |
|             |                                                          | 413  | CLGLTGEPQPPAHPQEATQPEIpYAESTKR | 75.7 | 15min_batch1 |
|             |                                                          | 413  | CLGLTGEPQPPAHPQEATQPEIpYAESTK  | 69.2 | 1min_batch1  |
| IPI00744706 | Isoform 3 of spectrin alpha chain, brain                 | 1053 | QEQIDNQpYHSLELGEK              | 23.8 | 15min_batch1 |
| IPI00746301 | Cyclin-dependent kinase-like 5                           | 173  | NLSEGNANYTEpYVATR              | 91.2 | 15min_batch2 |
| IPI00760833 | Isoform 1 of ankyrin repeat domain-containing protein 26 | 296  | KNLEATpYGTVR                   | 35.6 | 60min_batch1 |
| IPI00784156 | Isoform 1 of AP-2 complex subunit beta                   | 276  | DSDpYYN*MLLK                   | 39.3 | 5min_batch2  |
| IPI00784186 |                                                          | 364  | LRLDTASSNGpYQRPGSVVAAK         | 28.3 | 15min_batch1 |
|             |                                                          | 364  | LDTASSNGpYQRPGSVVAAK           | 59.5 | 60min_batch1 |
| IPI00797763 | Cingulin                                                 | 105  | GANDQGASGALSSDLELPENPpYSQVK    | 84.5 | 60min_batch2 |
| IPI00829652 | Putative RNA-binding protein 1c                          | 17   | TFNSELYSLNDpYKPPISK            | 60.0 | 1min_batch1  |
| IPI00844578 | ATP dependent helicase A                                 | 148  | GANLKDpYYSR                    | 26.4 | 5min_batch2  |
