# Supplementary material for: Tyrosine Phosphorylation Profiling in FGF-2 Stimulated Human Embryonic Stem Cells
Source: PubMed Central journal article supplement (PMC3060089; doi:10.1371/journal.pone.0017538), 2011-03-17
Supplement: pone.0017538.s005.pdf [file pone.0017538.s005.pdf]

| IPI accession no. | Gene name                                                                           | Motif pattern | Motif number |
|-------------------|-------------------------------------------------------------------------------------|---------------|--------------|
| IPI00737545       | NKF3 kinase family member                                                           | ...E..yA..... | 1            |
| IPI00376955       | PCTAIRE protein kinase 2                                                            | ...E..yA..... | 1            |
| IPI00043978       | ISOFORM 1 OF PARTITIONING DEFECTIVE 3 HOMOLOG B                                     | ...E..yA..... | 1            |
| IPI00307829       | cingulin-like 1                                                                     | ...E..yA..... | 1            |
| IPI00016932       | inositol polyphosphate phosphatase-like 1                                           | ...E..yA..... | 1            |
| IPI00023974       | pituitary tumor-transforming 1 interacting protein                                  | ...E..yA..... | 1            |
| IPI00328218       | ISOFORM 2 OF LIPOLYSIS-STIMULATED LIPOPROTEIN RECEPTOR                              | ...E..yA..... | 1            |
| IPI00023704       | LIM domain containing preferred translocation partner in lipoma                     | ...E..yA..... | 1            |
| IPI00002966       | heat shock 70kDa protein 4                                                          | ...E..yA..... | 1            |
| IPI00029731       | ribosomal protein L35a                                                              | ...E..yA..... | 1            |
| IPI00023942       | ISOFORM 2 OF SYNDECAN-3.                                                            | ...E..yA..... | 1            |
| IPI00103018       | PUTATIVE UNCHARACTERIZED PROTEIN KIAA1217                                           | ...E..yA..... | 1            |
| IPI00739386       | homolog of rat pragma of Rnd2                                                       | ...E..yA..... | 1            |
| IPI00396130       | SNAP25-interacting protein                                                          | ...E..yA..... | 1            |
| IPI00007248       | pleckstrin homology domain containing, family A member 6                            | ...E..yA..... | 1            |
| IPI00011736       | phosphoinositide-3-kinase, regulatory subunit 2 (beta)                              | ...E..yA..... | 1            |
| IPI00737545       | NKF3 kinase family member                                                           | ...E..yA..... | 1            |
| IPI00044678       | PFTAIRE protein kinase 2                                                            | ...E..yA..... | 1            |
| IPI00028931       | desmoglein 2                                                                        | ...E..yA..... | 1            |
| IPI00045423       | ISOFORM 7 OF PARTITIONING DEFECTIVE 3 HOMOLOG.                                      | ...E..yA..... | 1            |
| IPI00064607       | multiple EGF-like-domains 10                                                        | .....yD.P...  | 2            |
| IPI00011652       | embryonal Fyn-associated substrate                                                  | .....yD.P...  | 2            |
| IPI00011652       | embryonal Fyn-associated substrate                                                  | .....yD.P...  | 2            |
| IPI00026889       | disabled homolog 1 (Drosophila)                                                     | .....yD.P...  | 2            |
| IPI00011998       | BREAST CANCER ANTI-ESTROGEN RESISTANCE 1.                                           | .....yD.P...  | 2            |
| IPI00031068       | GRB2-associated binding protein 1                                                   | .....yD.P...  | 2            |
| IPI00011998       | BREAST CANCER ANTI-ESTROGEN RESISTANCE 1.                                           | .....yD.P...  | 2            |
| IPI00031407       | neural precursor cell expressed, developmentally down-regulated 9                   | .....yD.P...  | 2            |
| IPI00011998       | BREAST CANCER ANTI-ESTROGEN RESISTANCE 1.                                           | .....yD.P...  | 2            |
| IPI00011998       | BREAST CANCER ANTI-ESTROGEN RESISTANCE 1.                                           | .....yD.P...  | 2            |
| IPI000641339      | CDNA FLJ55515, HIGHLY SIMILAR TO BREAST CANCER ANTI-ESTROGEN RESISTANCE PROTEIN 1.  | .....yD.P...  | 2            |
| IPI00031407       | neural precursor cell expressed, developmentally down-regulated 9                   | .....yD.P...  | 2            |
| IPI00031407       | neural precursor cell expressed, developmentally down-regulated 9                   | .....yD.P...  | 2            |
| IPI00011998       | BREAST CANCER ANTI-ESTROGEN RESISTANCE 1.                                           | .....yD.P...  | 2            |
| IPI00014454       | Ras and Rab interactor 1                                                            | .....yD.P...  | 2            |
| IPI00017578       | Src homology 2 domain containing adaptor protein B                                  | .....yD.P...  | 2            |
| IPI00017578       | Src homology 2 domain containing adaptor protein B                                  | .....yD.P...  | 2            |
| IPI00017578       | Src homology 2 domain containing adaptor protein B                                  | .....yD.P...  | 2            |
| IPI00031068       | GRB2-associated binding protein 1                                                   | .....yD.P...  | 2            |
| IPI00017578       | Src homology 2 domain containing adaptor protein B                                  | .....yD.P...  | 2            |
| IPI00257508       | dihydropyrimidinase-like 2                                                          | .....yD.P...  | 2            |
| IPI00419836       | discoidin, CUB and LCCL domain containing 2                                         | .....yD.P...  | 2            |
| IPI00337612       | DISCOIDIN, CUB AND LCCL DOMAIN-CONTAINING PROTEIN 1.                                | .....yD.P...  | 2            |
| IPI00419836       | discoidin, CUB and LCCL domain containing 2                                         | .....yD.P...  | 2            |
| IPI00027721       | platelet-derived growth factor receptor, alpha polypeptide                          | .....yD.P...  | 2            |
| IPI00027834       | heterogeneous nuclear ribonucleoprotein L.                                          | .....yD.P...  | 2            |
| IPI00012885       | PTK2 protein tyrosine kinase 2                                                      | ...D..y.....  | 3            |
| IPI00464978       | insulin receptor substrate 2                                                        | ...D..y.....  | 3            |
| IPI00464978       | insulin receptor substrate 2                                                        | ...D..y.....  | 3            |
| IPI00186826       | EPHRIN RECEPTOR.                                                                    | ...D..y.....  | 3            |
| IPI00012885       | PTK2 protein tyrosine kinase 2                                                      | ...D..y.....  | 3            |
| IPI00001654       | ISOFORM 3 OF PERICENTRIOLAR MATERIAL 1 PROTEIN.                                     | ...D..y.....  | 3            |
| IPI00028931       | desmoglein 2                                                                        | ...D..y.....  | 3            |
| IPI00045423       | ISOFORM 7 OF PARTITIONING DEFECTIVE 3 HOMOLOG.                                      | ...D..y.....  | 3            |
| IPI00744706       | CDNA FLJ61399, HIGHLY SIMILAR TO SPECTRIN ALPHA CHAIN, BRAIN.                       | ...D..y.....  | 3            |
| IPI00064607       | multiple EGF-like-domains 10                                                        | ...D..y.....  | 3            |
| IPI00013988       | Rho GTPase activating protein 5                                                     | ...D..y.....  | 3            |
| IPI00411452       | PUTATIVE UNCHARACTERIZED PROTEIN DOCK11.                                            | ...D..y.....  | 3            |
| IPI00029273       | met proto-oncogene (hepatocyte growth factor receptor)                              | ...D..y.....  | 3            |
| IPI00029273       | met proto-oncogene (hepatocyte growth factor receptor)                              | ...D..y.....  | 3            |
| IPI00216592       | heterogeneous nuclear ribonucleoprotein C (C1/C2)                                   | ...D..y.....  | 3            |
| IPI00382946       | CCDC123 PROTEIN (FRAGMENT).                                                         | ...D..y.....  | 3            |
| IPI00061178       | RNA binding motif protein, X-linked-like 1                                          | ...D..y.....  | 3            |
| IPI00216219       | tight junction protein 1 (zona occludens 1)                                         | ...D..y.....  | 3            |
| IPI00383423       | coiled-coil domain containing 50                                                    | ...D..y.....  | 3            |
| IPI00014344       | dual-specificity tyrosine-(Y)-phosphorylation regulated kinase 1A                   | ...D..y.....  | 3            |
| IPI00021076       | plakophilin 4                                                                       | ...D..y.....  | 3            |
| IPI00005264       | plakophilin 2                                                                       | ...D..y.....  | 3            |
| IPI00008868       | microtubule-associated protein 1B                                                   | ...D..y.....  | 3            |
| IPI00012007       | adenosylhomocysteinase                                                              | ...D..y.....  | 3            |
| IPI00008868       | microtubule-associated protein 1B                                                   | ...D..y.....  | 3            |
| IPI00008868       | microtubule-associated protein 1B                                                   | ...D..y.....  | 3            |
| IPI00015180       | shroom family member 2                                                              | ...D..y.....  | 3            |
| IPI00296784       | MARVEL domain containing 2                                                          | ...D..y.....  | 3            |
| IPI00061178       | RNA binding motif protein, X-linked-like 1                                          | ...D..y.....  | 3            |
| IPI00014197       | CDV3 homolog (mouse)                                                                | ...D..y.....  | 3            |
| IPI00013881       | heterogeneous nuclear ribonucleoprotein H1 (H)                                      | ...D..y.....  | 3            |
| IPI00784156       | adaptor-related protein complex 2, beta 1 subunit                                   | ...D..y.....  | 3            |
| IPI00013933       | desmoplakin                                                                         | ...D..y.....  | 3            |
| IPI00410034       | solute carrier family 38, member 2                                                  | ...D..y.....  | 3            |
| IPI00027667       | cholecystokinin B receptor                                                          | ...D..y.....  | 3            |
| IPI00182469       | catenin (cadherin-associated protein), delta 1                                      | ...D..y.....  | 3            |
| IPI00023704       | LIM domain containing preferred translocation partner in lipoma                     | ...D..y.....  | 3            |
| IPI00170865       | membrane associated guanylate kinase, WW and PDZ domain containing 3                | ...D..y.....  | 3            |
| IPI00376306       | ISOFORM 2 OF MEMBRANE-ASSOCIATED GUANYLATE KINASE, WW AND PDZ DOMAIN- CONTAINING PR | ...D..y.....  | 3            |
| IPI00165946       | membrane associated guanylate kinase, WW and PDZ domain containing 1                | ...D..y.....  | 3            |
| IPI00031068       | GRB2-associated binding protein 1                                                   | ...D..y.....  | 3            |
| IPI00045423       | ISOFORM 7 OF PARTITIONING DEFECTIVE 3 HOMOLOG.                                      | ...D..y.....  | 3            |

|             |                                                                   |             |   |
|-------------|-------------------------------------------------------------------|-------------|---|
| IPI00029769 | hemopoietic cell kinase                                           | ...D.y..... | 3 |
| IPI00007750 | tubulin, alpha 4a                                                 | ...D.y..... | 3 |
| IPI00181905 | actin filament associated protein 1-like 2                        | ...D.y..... | 3 |
| IPI00220032 | ISOFORM 2 OF CATENIN DELTA-2.                                     | ...D.y..... | 3 |
| IPI00013981 | v-yes-1 Yamaguchi sarcoma viral oncogene homolog 1                | ...D.y..... | 3 |
| IPI00021326 | SHC (Src homology 2 domain containing) transforming protein 1     | ...D.y..... | 3 |
| IPI00217059 | coiled-coil domain containing 50                                  | ...D.y..... | 3 |
| IPI00438229 | tripartite motif-containing 28                                    | ...D.y..... | 3 |
| IPI00011736 | phosphoinositide-3-kinase, regulatory subunit 2 (beta)            | ...D.y..... | 3 |
| IPI00328218 | ISOFORM 2 OF LIPOLYSIS-STIMULATED LIPOPROTEIN RECEPTOR.           | ...D.y..... | 3 |
| IPI00290337 | epidermal growth factor receptor pathway substrate 8              | ...D.y..... | 3 |
| IPI00328218 | ISOFORM 2 OF LIPOLYSIS-STIMULATED LIPOPROTEIN RECEPTOR.           | ...D.y..... | 3 |
| IPI00412771 | CD2-associated protein                                            | ...D.y..... | 3 |
| IPI00384861 | G protein-coupled receptor kinase interacting ArfGAP 1            | ...D.y..... | 3 |
| IPI00012885 | PTK2 protein tyrosine kinase 2                                    | ...D.y..... | 3 |
| IPI00012885 | PTK2 protein tyrosine kinase 2                                    | ...D.y..... | 3 |
| IPI00012885 | PTK2 protein tyrosine kinase 2                                    | ...D.y..... | 3 |
| IPI00029702 | PTK2B protein tyrosine kinase 2 beta                              | ...D.y..... | 3 |
| IPI00019471 | insulin receptor substrate 1                                      | ...D.y..... | 3 |
| IPI00337612 | DISCOIDIN, CUB AND LCCL DOMAIN-CONTAINING PROTEIN 1.              | ...D.y..... | 3 |
| IPI00464978 | insulin receptor substrate 2                                      | ...D.y..... | 3 |
| IPI00419933 | pleckstrin homology domain containing, family A member 7          | ...D.y..... | 3 |
| IPI00419933 | pleckstrin homology domain containing, family A member 7          | ...D.y..... | 3 |
| IPI00021290 | ATP citrate lyase                                                 | ...D.y..... | 3 |
| IPI00464978 | insulin receptor substrate 2                                      | ...D.y..... | 3 |
| IPI00005904 | DEAD (Asp-Glu-Ala-Asp) box polypeptide 20                         | ...D.y..... | 3 |
| IPI00186826 | EPHRIN RECEPTOR.                                                  | ...D.y..... | 3 |
| IPI00008315 | EPH receptor B1                                                   | ...D.y..... | 3 |
| IPI00021275 | ISOFORM 1 OF EPHRIN TYPE-B RECEPTOR 2.                            | ...D.y..... | 3 |
| IPI00294250 | EPH receptor A1                                                   | ...D.y..... | 3 |
| IPI00289329 | EPH receptor B3                                                   | ...D.y..... | 3 |
| IPI00291175 | vinculin                                                          | ...D.y..... | 3 |
| IPI00030887 | TYRO3 protein tyrosine kinase                                     | ...D.y..... | 3 |
| IPI00395663 | ankyrin repeat and sterile alpha motif domain containing 1A       | ...D.y..... | 3 |
| IPI00182469 | catenin (cadherin-associated protein), delta 1                    | ...D.y..... | 3 |
| IPI00307545 | tensin 1                                                          | ...D.y..... | 3 |
| IPI00028931 | desmoglein 2                                                      | ...D.y..... | 3 |
| IPI00025803 | insulin receptor                                                  | ...E.y..... | 4 |
| IPI00025803 | insulin receptor                                                  | ...E.y..... | 4 |
| IPI00026689 | cell division cycle 2, G1 to S and G2 to M                        | ...E.y..... | 4 |
| IPI00023503 | cyclin-dependent kinase 3                                         | ...E.y..... | 4 |
| IPI00019025 | par-6 partitioning defective 6 homolog beta (C. elegans)          | ...E.y..... | 4 |
| IPI00028065 | NCK adaptor protein 1                                             | ...E.y..... | 4 |
| IPI00797763 | cingulin                                                          | ...E.y..... | 4 |
| IPI00008868 | microtubule-associated protein 1B                                 | ...E.y..... | 4 |
| IPI00438286 | ERBB2IP PROTEIN.                                                  | ...E.y..... | 4 |
| IPI00334715 | ISOFORM 1 OF GLUCOCORTICOID RECEPTOR DNA-BINDING FACTOR 1.        | ...E.y..... | 4 |
| IPI00021076 | plakophilin 4                                                     | ...E.y..... | 4 |
| IPI00045423 | ISOFORM 7 OF PARTITIONING DEFECTIVE 3 HOMOLOG.                    | ...E.y..... | 4 |
| IPI00220030 | paxillin                                                          | ...E.y..... | 4 |
| IPI00025803 | insulin receptor                                                  | ...E.y..... | 4 |
| IPI00025803 | insulin receptor                                                  | ...E.y..... | 4 |
| IPI00027422 | integrin, beta 4                                                  | ...E.y..... | 4 |
| IPI00025803 | insulin receptor                                                  | ...E.y..... | 4 |
| IPI00004901 | CDNA FLJ20242 FIS, CLONE COLF6369.                                | ...E.y..... | 4 |
| IPI00004901 | CDNA FLJ20242 FIS, CLONE COLF6369.                                | ...E.y..... | 4 |
| IPI00015180 | shroom family member 2                                            | ...E.y..... | 4 |
| IPI00298285 | v-erb-b2 erythroblastic leukemia viral oncogene homolog 3 (avian) | ...E.y..... | 4 |
| IPI00298285 | v-erb-b2 erythroblastic leukemia viral oncogene homolog 3 (avian) | ...E.y..... | 4 |
| IPI00183445 | latrophilin 1                                                     | ...E.y..... | 4 |
| IPI00017562 | latrophilin 2                                                     | ...E.y..... | 4 |
| IPI00216219 | tight junction protein 1 (zona occludens 1)                       | ...E.y..... | 4 |
| IPI00072377 | similar to SET translocation                                      | ...E.y..... | 4 |
| IPI00023530 | cyclin-dependent kinase 5                                         | ...E.y..... | 4 |
| IPI00026689 | cell division cycle 2, G1 to S and G2 to M                        | ...E.y..... | 4 |
| IPI00031681 | cyclin-dependent kinase 2                                         | ...E.y..... | 4 |
| IPI00219299 | talin 2                                                           | ...E.y..... | 4 |
| IPI00171134 | ISOFORM 1 OF GIRDIN.                                              | ...E.y..... | 4 |
| IPI00011913 | heterogeneous nuclear ribonucleoprotein A0                        | ...E.y..... | 4 |
| IPI00464978 | insulin receptor substrate 2                                      | ...E.y..... | 4 |
| IPI00470838 | ISOFORM 1 OF DENN DOMAIN-CONTAINING PROTEIN 2C.                   | ...E.y..... | 4 |
| IPI00169383 | phosphoglycerate kinase 1                                         | ...E.y..... | 4 |
| IPI00021439 | actin, beta                                                       | ...E.y..... | 4 |
| IPI00006176 | hepatocyte growth factor-regulated tyrosine kinase substrate      | ...E.y..... | 4 |
| IPI00001466 | echinoderm microtubule associated protein like 4                  | ...E.y..... | 4 |
| IPI00219217 | lactate dehydrogenase B                                           | ...E.y..... | 4 |
| IPI00174976 | membrane protein, palmitoylated 5 (MAGUK p55 subfamily member 5)  | ...E.y..... | 4 |
| IPI00289334 | filamin B, beta                                                   | ...E.y..... | 4 |
| IPI00179053 | breast cancer anti-estrogen resistance 3                          | ...E.y..... | 4 |
| IPI00022353 | tyrosine kinase 2                                                 | ...E.y..... | 4 |
| IPI00418545 | Rho guanine nucleotide exchange factor (GEF) 5                    | ...E.y..... | 4 |
| IPI00186990 | GRB2-associated binding protein 2                                 | ...E.y..... | 4 |
| IPI00302925 | 59 KDA PROTEIN.                                                   | ...E.y..... | 4 |
| IPI00018522 | protein arginine methyltransferase 1                              | ...E.y..... | 4 |
| IPI00099883 | G protein-coupled receptor, family C, group 5, member C           | ...E.y..... | 4 |
| IPI00099883 | G protein-coupled receptor, family C, group 5, member C           | ...E.y..... | 4 |
| IPI00024307 | ephrin-B1                                                         | ...E.y..... | 4 |
| IPI00001762 | oligophrenin 1                                                    | ...E.y..... | 4 |
| IPI00221089 | ribosomal protein S13                                             | ...E.y..... | 4 |

|             |                                                                                                                |            |   |
|-------------|----------------------------------------------------------------------------------------------------------------|------------|---|
| IPI00737545 | NKF3 kinase family member                                                                                      | ..E.y..... | 4 |
| IPI00012885 | PTK2 protein tyrosine kinase 2                                                                                 | ..E.y..... | 4 |
| IPI00329327 | ISOFORM 2 OF EXTRACELLULAR MATRIX PROTEIN FRAS1.                                                               | ..E.y..... | 4 |
| IPI00016670 | chromosome 11 open reading frame 59                                                                            | ..E.y..... | 4 |
| IPI00043622 | ISOFORM 1 OF FERM DOMAIN-CONTAINING PROTEIN 6.                                                                 | ..E.y..... | 4 |
| IPI00023503 | cyclin-dependent kinase 3                                                                                      | ..E.y..... | 4 |
| IPI00023503 | cyclin-dependent kinase 3                                                                                      | ..E.y..... | 4 |
| IPI00029601 | cortactin                                                                                                      | ..E.y..... | 4 |
| IPI00171499 | family with sequence similarity 59, member A                                                                   | ..E.y..... | 4 |
| IPI00395663 | ankyrin repeat and sterile alpha motif domain containing 1A                                                    | ..E.y..... | 4 |
| IPI00376221 | erythrocyte membrane protein band 4.1 like 5                                                                   | ..E.y..... | 4 |
| IPI00014873 | cyclin-dependent kinase 10                                                                                     | ..E.y..... | 4 |
| IPI00152881 | shroom family member 3                                                                                         | ..E.y..... | 4 |
| IPI00220032 | ISOFORM 2 OF CATENIN DELTA-2.                                                                                  | ..E.y..... | 4 |
| IPI00221316 | ISOFORM C OF PROTEIN SPROUTY HOMOLOG 4.                                                                        | ..E.y..... | 4 |
| IPI00183046 | protein tyrosine phosphatase, non-receptor type 6                                                              | ..E.y..... | 4 |
| IPI00298860 | lactotransferrin                                                                                               | ..E.y..... | 4 |
| IPI00301561 | thyroid hormone receptor interactor 6                                                                          | ..E.y..... | 4 |
| IPI00216008 | ISOFORM LONG OF GLUCOSE-6-PHOSPHATE 1-DEHYDROGENASE.                                                           | ..E.y..... | 4 |
| IPI00186826 | EPHRIN RECEPTOR.                                                                                               | ..E.y..... | 4 |
| IPI00021267 | EPH receptor A2                                                                                                | ..E.y..... | 4 |
| IPI00216991 | G protein-coupled receptor kinase interacting ArfGAP 2                                                         | ..E.y..... | 4 |
| IPI00029702 | PTK2B protein tyrosine kinase 2 beta                                                                           | ..E.y..... | 4 |
| IPI00005142 | fibroblast growth factor receptor 1                                                                            | ..E.y..... | 4 |
| IPI00005142 | fibroblast growth factor receptor 1                                                                            | ..E.y..... | 4 |
| IPI00005142 | fibroblast growth factor receptor 1                                                                            | ..E.y..... | 4 |
| IPI00016645 | EPH receptor A7                                                                                                | ..E.y..... | 4 |
| IPI00654623 | SIMILAR TO TENSIN 3.                                                                                           | ..E.y..... | 4 |
| IPI00171499 | family with sequence similarity 59, member A                                                                   | ..E.y..... | 4 |
| IPI00419836 | discoidin, CUB and LCCL domain containing 2                                                                    | ..E.y..... | 4 |
| IPI00016736 | phospholipase C, gamma 1                                                                                       | ..E.y..... | 4 |
| IPI00021267 | EPH receptor A2                                                                                                | ..E.y..... | 4 |
| IPI00016645 | EPH receptor A7                                                                                                | ..E.y..... | 4 |
| IPI00162743 | suppression of tumorigenicity 5                                                                                | ..E.y..... | 4 |
| IPI00008290 | EPH receptor A5                                                                                                | ..E.y..... | 4 |
| IPI00015756 | ISOFORM 1 OF RECEPTOR-TYPE TYROSINE-PROTEIN PHOSPHATASE KAPPA.                                                 | ..E.y..... | 4 |
| IPI00644865 | FERM domain containing 4A                                                                                      | ..E.y..... | 4 |
| IPI00300384 | v-erb-b2 erythroblastic leukemia viral oncogene homolog 2, neuro/glioblastoma derived oncogene homolog (avian) | ..E.y..... | 4 |
| IPI00016932 | inositol polyphosphate phosphatase-like 1                                                                      | ..E.y..... | 4 |
| IPI00013983 | ret proto-oncogene                                                                                             | ..E.y..... | 4 |
| IPI00013983 | ret proto-oncogene                                                                                             | ..E.y..... | 4 |
| IPI00140420 | staphylococcal nuclease and tudor domain containing 1                                                          | ..E.y..... | 4 |
| IPI00218570 | phosphoglycerate mutase 2 (muscle)                                                                             | ..E.y..... | 4 |
| IPI00004901 | CDNA FLJ20242 FIS, CLONE COLF6369.                                                                             | ..E.y..... | 4 |
| IPI00654623 | SIMILAR TO TENSIN 3.                                                                                           | .....y..R. | 5 |
| IPI00005741 | mitogen-activated protein kinase 13                                                                            | .....y..R. | 5 |
| IPI00002857 | mitogen-activated protein kinase 14                                                                            | .....y..R. | 5 |
| IPI00003479 | mitogen-activated protein kinase 1                                                                             | .....y..R. | 5 |
| IPI00003145 | mitogen-activated protein kinase 8                                                                             | .....y..R. | 5 |
| IPI00296283 | mitogen-activated protein kinase 12                                                                            | .....y..R. | 5 |
| IPI00003479 | mitogen-activated protein kinase 1                                                                             | .....y..R. | 5 |
| IPI00018195 | mitogen-activated protein kinase 3                                                                             | .....y..R. | 5 |
| IPI00301987 | missing oocyte, meiosis regulator, homolog (Drosophila)                                                        | .....y..R. | 5 |
| IPI00149048 | mitogen-activated protein kinase 7                                                                             | .....y..R. | 5 |
| IPI00059185 | chromosome 11 open reading frame 52                                                                            | .....y..R. | 5 |
| IPI00021076 | plakophilin 4                                                                                                  | .....y..R. | 5 |
| IPI00024320 | RNA binding motif (RNP1, RRM) protein 3                                                                        | .....y..R. | 5 |
| IPI00024320 | RNA binding motif (RNP1, RRM) protein 3                                                                        | .....y..R. | 5 |
| IPI00298285 | v-erb-b2 erythroblastic leukemia viral oncogene homolog 3 (avian)                                              | .....y..R. | 5 |
| IPI00216219 | tight junction protein 1 (zona occludens 1)                                                                    | .....y..R. | 5 |
| IPI00022434 | PUTATIVE UNCHARACTERIZED PROTEIN ALB.                                                                          | .....y..R. | 5 |
| IPI00746301 | cyclin-dependent kinase-like 5                                                                                 | .....y..R. | 5 |
| IPI00003985 | BCS1-like (yeast)                                                                                              | .....y..R. | 5 |
| IPI00005741 | mitogen-activated protein kinase 13                                                                            | .....y..R. | 5 |
| IPI00002857 | mitogen-activated protein kinase 14                                                                            | .....y..R. | 5 |
| IPI00296283 | mitogen-activated protein kinase 12                                                                            | .....y..R. | 5 |
| IPI00003145 | mitogen-activated protein kinase 8                                                                             | .....y..R. | 5 |
| IPI00024673 | mitogen-activated protein kinase 9                                                                             | .....y..R. | 5 |
| IPI00003479 | mitogen-activated protein kinase 1                                                                             | .....y..R. | 5 |
| IPI00029769 | hemopoietic cell kinase                                                                                        | .....y..R. | 5 |
| IPI00298625 | v-yes-1 Yamaguchi sarcoma viral related oncogene homolog                                                       | .....y..R. | 5 |
| IPI00018195 | mitogen-activated protein kinase 3                                                                             | .....y..R. | 5 |
| IPI00028570 | glycogen synthase kinase 3 beta                                                                                | .....y..R. | 5 |
| IPI00028570 | glycogen synthase kinase 3 beta                                                                                | .....y..R. | 5 |
| IPI00013981 | v-yes-1 Yamaguchi sarcoma viral oncogene homolog 1                                                             | .....y..R. | 5 |
| IPI00059964 | anterior pharynx defective 1 homolog A (C. elegans)                                                            | .....y..R. | 5 |
| IPI00031068 | GRB2-associated binding protein 1                                                                              | .....y..R. | 5 |
| IPI00298994 | talin 1                                                                                                        | .....y..R. | 5 |
| IPI00006482 | ATPase, Na+/K+ transporting, alpha 1 polypeptide                                                               | .....y..R. | 5 |
| IPI00022558 | myelin protein zero-like 1                                                                                     | .....y..R. | 5 |
| IPI00000352 | dual-specificity tyrosine-(Y)-phosphorylation regulated kinase 1B                                              | .....y..R. | 5 |
| IPI00219299 | talin 2                                                                                                        | .....y..R. | 5 |
| IPI00220032 | ISOFORM 2 OF CATENIN DELTA-2.                                                                                  | .....y..R. | 5 |
| IPI00182469 | catenin (cadherin-associated protein), delta 1                                                                 | .....y..R. | 5 |
| IPI00022521 | dual-specificity tyrosine-(Y)-phosphorylation regulated kinase 2                                               | .....y..R. | 5 |
| IPI00332841 | Rap guanine nucleotide exchange factor (GEF) 1                                                                 | .....y..R. | 5 |
| IPI00017578 | Src homology 2 domain containing adaptor protein B                                                             | .....y..R. | 5 |
| IPI00099522 | homeodomain interacting protein kinase 3                                                                       | .....y..R. | 5 |
| IPI00099522 | homeodomain interacting protein kinase 3                                                                       | .....y..R. | 5 |

|              |                                                                                                      |              |   |
|--------------|------------------------------------------------------------------------------------------------------|--------------|---|
| IPI00215949  | similar to homeodomain interacting protein kinase 2                                                  | .....y...R.. | 5 |
| IPI00215949  | similar to homeodomain interacting protein kinase 2                                                  | .....y...R.. | 5 |
| IPI00419373  | heterogeneous nuclear ribonucleoprotein A3                                                           | .....y...R.. | 5 |
| IPI00103018  | PUTATIVE UNCHARACTERIZED PROTEIN KIAA1217.                                                           | .....y...R.. | 5 |
| IPI00012752  | growth factor receptor-bound protein 10                                                              | .....y...R.. | 5 |
| IPI00001477  | discoidin domain receptor tyrosine kinase 1                                                          | .....y...R.. | 5 |
| IPI00453473  | histone cluster 2, H4b                                                                               | .....y...R.. | 5 |
| IPI00382749  | RIBOSOMAL PROTEIN L15.                                                                               | .....y...R.. | 5 |
| IPI00464978  | insulin receptor substrate 2                                                                         | .....y...R.. | 5 |
| IPI00470360  | kin of IRRE like (Drosophila)                                                                        | .....y...R.. | 5 |
| IPI00215948  | catenin (cadherin-associated protein), alpha 1, 102kDa                                               | .....y...R.. | 5 |
| IPI00024312  | FYVE, RhoGEF and PH domain containing 1                                                              | .....y...R.. | 5 |
| IPI00470360  | kin of IRRE like (Drosophila)                                                                        | .....y...R.. | 5 |
| IPI00005264  | plakophilin 2                                                                                        | .....y...R.. | 5 |
| IPI00024067  | clathrin, heavy chain (Hc)                                                                           | .....y...R.. | 5 |
| IPI00337612  | DISCOIDIN, CUB AND LCCL DOMAIN-CONTAINING PROTEIN 1.                                                 | .....y...R.. | 5 |
| IPI00298994  | talin 1                                                                                              | .....y...R.. | 5 |
| IPI00296992  | AXL receptor tyrosine kinase                                                                         | .....y...R.. | 5 |
| IPI00296992  | AXL receptor tyrosine kinase                                                                         | .....y...R.. | 5 |
| IPI00166680  | misshapen-like kinase 1 (zebrafish)                                                                  | .....y...R.. | 5 |
| IPI00419100  | FYVE, RhoGEF and PH domain containing 6                                                              | .....y...R.. | 5 |
| IPI00029756  | c-mer proto-oncogene tyrosine kinase                                                                 | .....y...R.. | 5 |
| IPI00219757  | glutathione S-transferase pi 1                                                                       | .....y...R.. | 5 |
| IPI00149048  | mitogen-activated protein kinase 7                                                                   | .....y...R.. | 5 |
| IPI00013721  | similar to hCG1820375                                                                                | .....y...R.. | 5 |
| IPI00478892  | leucine-rich repeats and immunoglobulin-like domains 2                                               | .....y...R.. | 5 |
| IPI00021428  | actin, alpha 1, skeletal muscle                                                                      | .....y...R.. | 5 |
| IPI00219798  | roundabout, axon guidance receptor, homolog 1 (Drosophila)                                           | .....y...R.. | 5 |
| IPI00021076  | plakophilin 4                                                                                        | .....yE..... | 6 |
| IPI00029601  | cortactin                                                                                            | .....yE..... | 6 |
| IPI00029601  | cortactin                                                                                            | .....yE..... | 6 |
| IPI00021267  | EPH receptor A2                                                                                      | .....yE..... | 6 |
| IPI00008318  | EPH receptor A4                                                                                      | .....yE..... | 6 |
| IPI00216219  | tight junction protein 1 (zona occludens 1)                                                          | .....yE..... | 6 |
| IPI00644231  | cytoplasmic FMR1 interacting protein 1                                                               | .....yE..... | 6 |
| IPI00021076  | plakophilin 4                                                                                        | .....yE..... | 6 |
| IPI00008438  | ribosomal protein S10                                                                                | .....yE..... | 6 |
| IPI00025803  | insulin receptor                                                                                     | .....yE..... | 6 |
| IPI00025803  | insulin receptor                                                                                     | .....yE..... | 6 |
| IPI00025803  | insulin receptor                                                                                     | .....yE..... | 6 |
| IPI00025803  | insulin receptor                                                                                     | .....yE..... | 6 |
| IPI00025803  | insulin receptor                                                                                     | .....yE..... | 6 |
| IPI000301561 | thyroid hormone receptor interactor 6                                                                | .....yE..... | 6 |
| IPI00175416  | phospholipase C, eta 1                                                                               | .....yE..... | 6 |
| IPI00025803  | insulin receptor                                                                                     | .....yE..... | 6 |
| IPI00012011  | cofilin 1 (non-muscle)                                                                               | .....yE..... | 6 |
| IPI00383423  | coiled-coil domain containing 50                                                                     | .....yE..... | 6 |
| IPI00478817  | Rho guanine nucleotide exchange factor (GEF) 10-like                                                 | .....yE..... | 6 |
| IPI00021439  | actin, beta                                                                                          | .....yE..... | 6 |
| IPI00031407  | neural precursor cell expressed, developmentally down-regulated 9                                    | .....yE..... | 6 |
| IPI00008868  | microtubule-associated protein 1B                                                                    | .....yE..... | 6 |
| IPI00008868  | microtubule-associated protein 1B                                                                    | .....yE..... | 6 |
| IPI00167198  | ISOFORM 2 OF U4/U6 SMALL NUCLEAR RIBONUCLEOPROTEIN PRP31.                                            | .....yE..... | 6 |
| IPI00182469  | catenin (cadherin-associated protein), delta 1                                                       | .....yE..... | 6 |
| IPI00107633  | SH3 AND MULTIPLE ANKYRIN REPEAT DOMAINS 2 ISOFORM 2.                                                 | .....yE..... | 6 |
| IPI00216969  | c-abl oncogene 1, receptor tyrosine kinase                                                           | .....yE..... | 6 |
| IPI00023704  | LIM domain containing preferred translocation partner in lipoma                                      | .....yE..... | 6 |
| IPI00005126  | ephrin-B2                                                                                            | .....yE..... | 6 |
| IPI00107698  | fibroblast growth factor receptor substrate 2                                                        | .....yE..... | 6 |
| IPI00328737  | zinc finger protein 598                                                                              | .....yE..... | 6 |
| IPI00024307  | ephrin-B1                                                                                            | .....yE..... | 6 |
| IPI00217872  | ISOFORM 2 OF PHOSPHOGLUCOMUTASE-1.                                                                   | .....yE..... | 6 |
| IPI00021076  | plakophilin 4                                                                                        | .....yE..... | 6 |
| IPI00302690  | actin-related protein 10 homolog (S. cerevisiae)                                                     | .....yE..... | 6 |
| IPI00029263  | fer (fps/fes related) tyrosine kinase                                                                | .....yE..... | 6 |
| IPI00186990  | GRB2-associated binding protein 2                                                                    | .....yE..... | 6 |
| IPI00021076  | plakophilin 4                                                                                        | .....yE..... | 6 |
| IPI00029601  | cortactin                                                                                            | .....yE..... | 6 |
| IPI00216171  | enolase 2 (gamma, neuronal)                                                                          | .....yE..... | 6 |
| IPI00328587  | ENOLASE.                                                                                             | .....yE..... | 6 |
| IPI00003431  | mitogen-activated protein kinase 6                                                                   | .....yE..... | 6 |
| IPI00016736  | phospholipase C, gamma 1                                                                             | .....yE..... | 6 |
| IPI00217223  | phosphoribosylaminoimidazole carboxylase, phosphoribosylaminoimidazole succinocarboxamide synthetase | .....yE..... | 6 |
| IPI00010740  | splicing factor proline/glutamine-rich (polypyrimidine tract binding protein associated)             | .....yE..... | 6 |
| IPI00414123  | collapsin response mediator protein 1                                                                | .....yE..... | 6 |
| IPI00022959  | poliovirus receptor-related 3                                                                        | .....yE..... | 6 |
| IPI00216008  | ISOFORM LONG OF GLUCOSE-6-PHOSPHATE 1-DEHYDROGENASE.                                                 | .....yE..... | 6 |
| IPI00298347  | protein tyrosine phosphatase, non-receptor type 11                                                   | .....yE..... | 6 |
| IPI00021267  | EPH receptor A2                                                                                      | .....yE..... | 6 |
| IPI00186826  | EPHRIN RECEPTOR.                                                                                     | .....yE..... | 6 |
| IPI00021267  | EPH receptor A2                                                                                      | .....yE..... | 6 |
| IPI00186826  | EPHRIN RECEPTOR.                                                                                     | .....yE..... | 6 |
| IPI00008318  | EPH receptor A4                                                                                      | .....yE..... | 6 |
| IPI00008315  | EPH receptor B1                                                                                      | .....yE..... | 6 |
| IPI00008318  | EPH receptor A4                                                                                      | .....yE..... | 6 |
| IPI00016645  | EPH receptor A7                                                                                      | .....yE..... | 6 |
| IPI00291175  | vinculin                                                                                             | .....yE..... | 6 |
| IPI00470360  | kin of IRRE like (Drosophila)                                                                        | .....yE..... | 6 |
| IPI00296913  | nudix (nucleoside diphosphate linked moiety X)-type motif 5                                          | .....yE..... | 6 |

|             |                                                                                                          |              |   |
|-------------|----------------------------------------------------------------------------------------------------------|--------------|---|
| IPI00031030 | amyloid beta (A4) precursor-like protein 2                                                               | .....yE..... | 6 |
| IPI00006608 | amyloid beta (A4) precursor protein                                                                      | .....yE..... | 6 |
| IPI00643785 | MYELOID/LYMPHOID OR MIXED-LINEAGE LEUKEMIA.                                                              | .....yE..... | 6 |
| IPI00419100 | FYVE, RhoGEF and PH domain containing 6                                                                  | .....yE..... | 6 |
| IPI00016736 | phospholipase C, gamma 1                                                                                 | .....yE..... | 6 |
| IPI00013983 | ret proto-oncogene                                                                                       | .....yE..... | 6 |
| IPI00013983 | ret proto-oncogene                                                                                       | .....yE..... | 6 |
| IPI00329801 | annexin A5                                                                                               | .....yE..... | 6 |
| IPI00023461 | ISOFORM 4 OF AFADIN.                                                                                     | .....yE..... | 6 |
| IPI00293126 | tubulin folding cofactor B                                                                               | .....yE..... | 6 |
| IPI00029273 | met proto-oncogene (hepatocyte growth factor receptor)                                                   | .....Dy..... | 7 |
| IPI00018335 | fms-related tyrosine kinase 1 (vascular endothelial growth factor/vascular permeability factor receptor) | .....Dy..... | 7 |
| IPI00334715 | ISOFORM 1 OF GLUCOCORTICOID RECEPTOR DNA-BINDING FACTOR 1.                                               | .....Dy..... | 7 |
| IPI00021076 | plakophilin 4                                                                                            | .....Dy..... | 7 |
| IPI00018274 | epidermal growth factor receptor (erythroblastic leukemia viral (v-erb-b) oncogene homolog, avian)       | .....Dy..... | 7 |
| IPI00298285 | v-erb-b2 erythroblastic leukemia viral oncogene homolog 3 (avian)                                        | .....Dy..... | 7 |
| IPI00396435 | DEAH (Asp-Glu-Ala-His) box polypeptide 15                                                                | .....Dy..... | 7 |
| IPI00029515 | pleckstrin homology domain containing, family A member 5                                                 | .....Dy..... | 7 |
| IPI00014344 | dual-specificity tyrosine-(Y)-phosphorylation regulated kinase 1A                                        | .....Dy..... | 7 |
| IPI00844578 | DEAH (Asp-Glu-Ala-His) box polypeptide 9                                                                 | .....Dy..... | 7 |
| IPI00005264 | plakophilin 2                                                                                            | .....Dy..... | 7 |
| IPI00829652 | RNA binding motif protein 16                                                                             | .....Dy..... | 7 |
| IPI00026952 | plakophilin 3                                                                                            | .....Dy..... | 7 |
| IPI00029601 | cortactin                                                                                                | .....Dy..... | 7 |
| IPI00017578 | Src homology 2 domain containing adaptor protein B                                                       | .....Dy..... | 7 |
| IPI00031461 | CDNA FLJ60299, HIGHLY SIMILAR TO RAB GDP DISSOCIATION INHIBITOR BETA.                                    | .....Dy..... | 7 |
| IPI00431025 | abl-interactor 1                                                                                         | .....Dy..... | 7 |
| IPI00442210 | ISOFORM 1 OF ABL INTERACTOR 2.                                                                           | .....Dy..... | 7 |
| IPI00008530 | ribosomal protein, large, P0                                                                             | .....Dy..... | 7 |
| IPI00023704 | LIM domain containing preferred translocation partner in lipoma                                          | .....Dy..... | 7 |
| IPI00017578 | Src homology 2 domain containing adaptor protein B                                                       | .....Dy..... | 7 |
| IPI00185919 | La ribonucleoprotein domain family, member 1                                                             | .....Dy..... | 7 |
| IPI00027705 | primase, DNA, polypeptide 2 (58kDa)                                                                      | .....Dy..... | 7 |
| IPI00012885 | PTK2 protein tyrosine kinase 2                                                                           | .....Dy..... | 7 |
| IPI00012885 | PTK2 protein tyrosine kinase 2                                                                           | .....Dy..... | 7 |
| IPI00015287 | docking protein 1, 62kDa (downstream of tyrosine kinase 1)                                               | .....Dy..... | 7 |
| IPI00022228 | high density lipoprotein binding protein                                                                 | .....Dy..... | 7 |
| IPI00455851 | KIAA1688 protein                                                                                         | .....Dy..... | 7 |
| IPI00298347 | protein tyrosine phosphatase, non-receptor type 11                                                       | .....Dy..... | 7 |
| IPI00464978 | insulin receptor substrate 2                                                                             | .....Dy..... | 7 |
| IPI00027174 | fibroblast growth factor receptor 3                                                                      | .....Dy..... | 7 |
| IPI00027174 | fibroblast growth factor receptor 3                                                                      | .....Dy..... | 7 |
| IPI00054004 | HYPOTHETICAL PROTEIN LOC643896.                                                                          | .....Dy..... | 7 |
| IPI00005142 | fibroblast growth factor receptor 1                                                                      | .....Dy..... | 7 |
| IPI00005142 | fibroblast growth factor receptor 1                                                                      | .....Dy..... | 7 |
| IPI00010680 | fibroblast growth factor receptor 2                                                                      | .....Dy..... | 7 |
| IPI00010680 | fibroblast growth factor receptor 2                                                                      | .....Dy..... | 7 |
| IPI00031068 | GRB2-associated binding protein 1                                                                        | .....Dy..... | 7 |
| IPI00023343 | discs, large homolog 3 (Drosophila)                                                                      | .....Dy..... | 7 |
| IPI00464978 | insulin receptor substrate 2                                                                             | .....Dy..... | 7 |
| IPI00296992 | AXL receptor tyrosine kinase                                                                             | .....Dy..... | 7 |
| IPI00296992 | AXL receptor tyrosine kinase                                                                             | .....Dy..... | 7 |
| IPI00470360 | kin of IRRE like (Drosophila)                                                                            | .....Dy..... | 7 |
| IPI00029756 | c-mer proto-oncogene tyrosine kinase                                                                     | .....Dy..... | 7 |
| IPI00029756 | c-mer proto-oncogene tyrosine kinase                                                                     | .....Dy..... | 7 |
| IPI00221067 | ISOFORM 2 OF RECEPTOR-TYPE TYROSINE-PROTEIN PHOSPHATASE ALPHA.                                           | .....Dy..... | 7 |
| IPI00001477 | discoidin domain receptor tyrosine kinase 1                                                              | .....Dy..... | 7 |
| IPI00307545 | tensin 1                                                                                                 | .....Dy..... | 7 |
| IPI00013396 | small nuclear ribonucleoprotein polypeptide C                                                            | .....Dy..... | 7 |
| IPI00180143 | CDC-like kinase 4                                                                                        | .....Dy..... | 7 |
| IPI00004500 | Nedd4 binding protein 3                                                                                  | .....Dy..... | 7 |
| IPI00292856 | Cas-Br-M (murine) ecotropic retroviral transforming sequence b                                           | .....Dy..... | 7 |
| IPI00374301 | HYPOTHETICAL PROTEIN.                                                                                    | .....Dy..... | 7 |
| IPI00002211 | ISOFORM 2 OF SEMAPHORIN-6A.                                                                              | .....Dy..... | 7 |
| IPI00032003 | emerin                                                                                                   | .....Dy..... | 7 |
| IPI00464978 | insulin receptor substrate 2                                                                             | .....Dy..... | 7 |
