# Supplementary material for: Tyrosine Phosphorylation Profiling in FGF-2 Stimulated Human Embryonic Stem Cells
Source: PubMed Central journal article supplement (PMC3060089; doi:10.1371/journal.pone.0017538), 2011-03-17
Supplement: pone.0017538.s006.pdf [file pone.0017538.s006.pdf]

| IPI accession no. | Protein                                                                             | Phosphopeptide                    | Phosphosites | * Fold Change of phosphorylation post FGF-2 stimulation |       |        |
|-------------------|-------------------------------------------------------------------------------------|-----------------------------------|--------------|---------------------------------------------------------|-------|--------|
|                   |                                                                                     |                                   |              | 0 min                                                   | 5 min | 15 min |
| IPI00431025       | ABL1 Isoform 1 of Abl Interactor 1                                                  | TLEPVKPTVPNDpYMTSPAR              | Y213         | 0                                                       | 0.68  | 0.13   |
| IPI00216969       | ABL1 Isoform IA of Proto-oncogene tyrosine-protein kinase ABL1                      | IMTASDGKLPYVSESR                  | Y185         | 0                                                       | -0.11 | -0.07  |
| IPI00216969       | ABL1 Isoform IA of Proto-oncogene tyrosine-protein kinase ABL1                      | LMTGDDTPYTAHAGAK                  | Y393         | 0                                                       | -0.11 | -0.17  |
| IPI00216969       | ABL1 Isoform IA of Proto-oncogene tyrosine-protein kinase ABL1                      | LGGGQYGEVpYEGVWKK                 | Y257         | 0                                                       | 0.47  | 0.26   |
| IPI00013508       | ACTN1 Alpha-actinin-1                                                               | AIMTpyVSSFYHAFSGAOK               | Y241         | 0                                                       | -0.12 | -0.20  |
| IPI00181905       | AFAP1L2 Isoform 1 of Actin filament-associated protein 1-like 2                     | SKVAQQPLSLVGCVEVDPDSDHLPYSFR      | Y413         | 0                                                       | -0.05 | 0.54   |
| IPI00395663       | ANKS1A Ankyrin repeat and SAM domain-containing protein 1A                          | EEDHEPpYELLLLTAEIK                | Y455         | 0                                                       | 1.32  | 1.25   |
| IPI00217418       | ARHGAP12 Isoform 2 of Rho GTPase-activating protein 12                              | ATTPPNQGRDPpSPVpYANLQELK          | Y243         | 0                                                       | -0.49 | -0.51  |
| IPI00646885       | ARHGAP5 Rho GTPase activating protein 5 isoform a                                   | VPLAHPEEDMDPSDNPYAEPIIDTFK        | Y1091        | 0                                                       | 0.68  | 0.77   |
| IPI00013988       | ARHGAP5 Rho GTPase-activating protein 5                                             | GYSDELpYVVDSDSNR                  | Y1109        | 0                                                       | 0.31  | 0.37   |
| IPI00641339       | BCAR1 93 kDa protein                                                                | AQQQLpYQVPGSPQFQSPPAK             | Y212         | 0                                                       | 0.52  | 0.39   |
| IPI00641339       | BCAR1 93 kDa protein                                                                | DVPDGLRLRETPYDVPFAFAK             | Y411         | 0                                                       | 0.82  | 0.54   |
| IPI00641339       | BCAR1 93 kDa protein                                                                | GLLPSQpYQGVQVYDTPPMMAVK           | Y346         | 0                                                       | 0.77  | 0.46   |
| IPI00641339       | BCAR1 93 kDa protein                                                                | GPNGRDLLEVPYDVPSPVEK              | Y371         | 0                                                       | 0.33  | 0.19   |
| IPI00641339       | BCAR1 93 kDa protein                                                                | HLLAPGQDIPpYDVPVPR                | Y333         | 0                                                       | 0.07  | 0.09   |
| IPI00641339       | BCAR1 93 kDa protein                                                                | RPGPGLpYDVPVPR                    | Y471         | 0                                                       | 0.47  | 0.08   |
| IPI00641339       | BCAR1 93 kDa protein                                                                | VLPPEVADGVVDSGVpYAVPPAER          | Y494         | 0                                                       | 0.75  | 0.83   |
| IPI0004497        | BCR Isoform 1 of Breakpoint cluster region protein                                  | GHGQPGADAEKFPpYVNVFHHHER          | Y177         | 0                                                       | 1.19  | 1.09   |
| IPI00059185       | C11orf52 Uncharacterized protein C11orf52                                           | HVHLENATepYATLR                   | Y103         | 0                                                       | 1.53  | 0.19   |
| IPI00016670       | C11orf59 UPF0404 protein C11orf59                                                   | ALNGAEPNPYHSLPSAR                 | Y40          | 0                                                       | 1.11  | 0.91   |
| IPI0007067        | C9orf19 Golgi-associated plant pathogenesis-related protein 1                       | EAQQYpYSEALASTR                   | Y42          | 0                                                       | -0.50 | 0.05   |
| IPI00027269       | CBL E3 ubiquitin-protein ligase CBL                                                 | IKPSSSANAIPYSLAARPLPVPK           | Y674         | 0                                                       | 0.94  | 0.56   |
| IPI00061178       | CCBL2 kynurenine aminotransferase III isoform 3                                     | DVPYLSRDRDGYSTK                   | Y222         | 0                                                       | -0.35 | -0.56  |
| IPI00382946       | CCDC123 CCDC123 protein (Fragment)                                                  | GGHSDDLpYAVPHR                    | Y157         | 0                                                       | 0.00  | 0.06   |
| IPI00219852       | CD46 Isoform B of Membrane cofactor protein precursor                               | ADGGAEpYATYQTK                    | Y384         | 0                                                       | 2.74  | 2.14   |
| IPI00026689       | CDC2 Putative uncharacterized protein DKFzP686L20222                                | IEKIGEGpTjYGVVYK                  | T14, Y15     | 0                                                       | -0.16 | -0.09  |
| IPI00026689       | CDC2 Putative uncharacterized protein DKFzP686L20222                                | IGEGTjYGVVYK                      | Y15          | 0                                                       | -0.45 | -0.14  |
| IPI00026689       | CDC2 Putative uncharacterized protein DKFzP686L20222                                | IGEGTjYGVVYK                      | Y19          | 0                                                       | 0.26  | 0.11   |
| IPI00031681       | CDK2 Cell division protein kinase 2                                                 | VEKIGEGTjYGVVYK                   | T14, Y15     | 0                                                       | -0.39 | -0.77  |
| IPI00031681       | CDK2 Cell division protein kinase 2                                                 | VEKIGEGTjYGVVYK                   | T14, Y19     | 0                                                       | -0.37 | -0.70  |
| IPI00031681       | CDK2 Cell division protein kinase 2                                                 | VEKIGEGTjYGVVYK                   | Y15          | 0                                                       | -0.56 | -0.34  |
| IPI00023530       | CDK5 Cell division protein kinase 5                                                 | IGEGTjYGVVYK                      | Y15          | 0                                                       | 1.33  | 1.57   |
| IPI00746301       | CDKL5 Uncharacterized protein CDKL5                                                 | NLSEGNNAIYEpYVATR                 | Y171         | 0                                                       | 0.37  | 0.43   |
| IPI00014197       | CDV3 Isoform 1 of Protein CDV3 homolog                                              | KTPGQPEIpYSDTQFPLQSTAK            | Y190         | 0                                                       | 1.98  | 1.50   |
| IPI00797763       | CGN Cingulin                                                                        | GANDQASGALSSDLEPENpYQVQK          | Y105         | 0                                                       | 0.29  | 0.44   |
| IPI00141318       | CKAP4 Isoform 1 of Cytoskeleton-associated protein 4                                | STLQTMESDIPYTVR                   | Y322         | 0                                                       | -0.05 | -0.16  |
| IPI00011084       | CLDN6 Claudin-6                                                                     | GPSEpYTKNpYV                      | Y214, Y219   | 0                                                       | 0.28  | 0.49   |
| IPI00011084       | CLDN6 Claudin-6                                                                     | GPSEpYTKNpYV                      | Y219         | 0                                                       | 0.90  | 0.79   |
| IPI00024067       | CLTC Isoform 1 of Clathrin heavy chain 1                                            | ALEHFTDLPYDIKR                    | Y634         | 0                                                       | -0.44 | -0.59  |
| IPI00295857       | COPA Coatomer subunit alpha                                                         | GHPYNNVSCAVFHPR                   | Y249         | 0                                                       | 0.17  | 0.19   |
| IPI00414123       | CRMP1 Dihydropyrimidinase-related protein 1                                         | GMpYDGPVYEVPAATK                  | Y499         | 0                                                       | 0.31  | 0.28   |
| IPI00215948       | CTNNA1 Isoform 1 of Catenin alpha-1                                                 | ANRDLIPYK                         | Y245         | 0                                                       | 0.45  | 0.96   |
| IPI00215948       | CTNNA1 Isoform 1 of Catenin alpha-1                                                 | LVpYDGIR                          | Y619         | 0                                                       | -0.17 | -0.35  |
| IPI00215948       | CTNNA1 Isoform 1 of Catenin alpha-1                                                 | NAGNEQDGLIQpYK                    | Y177         | 0                                                       | -0.07 | 0.07   |
| IPI00219725       | CTNND1 Isoform 2AB of Catenin delta-1                                               | HYEDGYPGGSDNpYGSLSR               | Y174         | 0                                                       | 1.04  | 1.21   |
| IPI00219725       | CTNND1 Isoform 2AB of Catenin delta-1                                               | LNPGQDHSLLpYSTIPR                 | Y42          | 0                                                       | 0.79  | 0.93   |
| IPI00219725       | CTNND1 Isoform 2AB of Catenin delta-1                                               | QDpYpYQPOVPR                      | Y203         | 0                                                       | 0.99  | 1.23   |
| IPI00219725       | CTNND1 Isoform 2AB of Catenin delta-1                                               | SLDNNpYSTPNER                     | Y844         | 0                                                       | 1.24  | 1.52   |
| IPI00220032       | CTNND2 Isoform 2 of Catenin delta-2                                                 | ASYAAGPASNPYADPYR                 | Y499         | 0                                                       | 0.78  | 0.66   |
| IPI00220032       | CTNND2 Isoform 2 of Catenin delta-2                                                 | GGSAPEGATpYAAPR                   | Y292         | 0                                                       | 0.14  | 0.71   |
| IPI00029601       | CTTN Src substrate cortactin                                                        | GPVSETEPEPpYYSMEAADYR             | Y446         | 0                                                       | 1.09  | 0.90   |
| IPI00029601       | CTTN Src substrate cortactin                                                        | LPSSPpYEDAASFK                    | Y421         | 0                                                       | 1.83  | 1.18   |
| IPI00029601       | CTTN Src substrate cortactin                                                        | TQDTPPVPAPQTEERLPSSPpYEDAASFK     | T400, Y421   | 0                                                       | 1.31  | 0.69   |
| IPI00019146       | CXADR Isoform 1 of Coxsackievirus and adenovirus receptor precursor                 | SYGSHNSLSSGMSpSNMEGpYSK           | Y313         | 0                                                       | 0.74  | 0.98   |
| IPI00019146       | CXADR Isoform 1 of Coxsackievirus and adenovirus receptor precursor                 | TQpYNNQVSEDFER                    | Y318         | 0                                                       | 1.03  | 0.53   |
| IPI00026889       | DAB1 Isoform DAB55 of Disabled homolog 1                                            | EGVpYDVPK                         | Y232         | 0                                                       | 1.64  | 1.40   |
| IPI00337612       | DCBLD1 Discoidin, CUB and LCCL domain-containing protein 1 precursor                | AHTFSAQSGpYRVPGPQGHK              | Y662         | 0                                                       | -0.18 | -0.27  |
| IPI00337612       | DCBLD1 Discoidin, CUB and LCCL domain-containing protein 1 precursor                | AVSALATESGHPDpSQKPPHPTGTSdSPYSAPR | Y737         | 0                                                       | -1.04 | -1.09  |
| IPI00419836       | DCBLD2 Isoform 1 of Discoidin, CUB and LCCL domain-containing protein 1             | AGKPGLPAPDELVpYQVQDSTQEVSGAGR     | Y791         | 0                                                       | -0.28 | -0.21  |
| IPI00396435       | DHX15 Putative pre-mRNA-splicing factor ATP-dependent RNA helicase DDX15            | HRLDLGEDpYPSGK                    | Y13          | 0                                                       | 1.11  | 0.97   |
| IPI00023343       | DLG3 Disks large homolog 3                                                          | INEVDGQDpYHFVVS                   | Y673         | 0                                                       | 0.26  | 1.14   |
| IPI00257508       | DPYSL2 Dihydropyrimidinase-related protein 2                                        | GLpYDGPVCEVSPVK                   | Y499         | 0                                                       | 1.14  | 0.77   |
| IPI00014344       | DYRK1A Isoform Long of Dual specificity tyrosine-phosphorylation-regulated kinase 1 | KVYNDGVDNpYDVIK                   | Y145         | 0                                                       | 0.03  | -0.04  |
| IPI00000352       | DYRK1B Isoform 1 of Dual specificity tyrosine-phosphorylation-regulated kinase 1    | HYpYQISR                          | Y273         | 0                                                       | -0.44 | -0.48  |
| IPI00022521       | DYRK2 Isoform 2 of Dual specificity tyrosine-phosphorylation-regulated kinase 2     | VYTPYQISR                         | Y309         | 0                                                       | -0.19 | -0.29  |
| IPI00641459       | EEF1A1 Similar to Elongation factor 1 alpha                                         | EHALLpYTLGK                       | Y141         | 0                                                       | -0.02 | -0.06  |
| IPI00641459       | EEF1A1 Similar to Elongation factor 1 alpha                                         | STTGHLPYK                         | Y29          | 0                                                       | 0.73  | 1.26   |
| IPI00024307       | EFNB1 Ephrin-B1 precursor                                                           | TTEENYCPHYPYK                     | Y317         | 0                                                       | 2.06  | 2.33   |
| IPI00024307       | EFNB1 Ephrin-B1 precursor                                                           | YSGDpYGHpYVIVQEMPPQSPANIYYKV      | Y324         | 0                                                       | 1.32  | 1.05   |
| IPI00011652       | EFS Isoform Efs1 of Embryonal Fyn-associated substrate                              | DALEVPYDVPPTALR                   | Y148         | 0                                                       | 0.79  | 0.36   |
| IPI00011652       | EFS Isoform Efs1 of Embryonal Fyn-associated substrate                              | VPSSGpYDPCASFPASHPLTR             | Y163         | 0                                                       | 1.17  | 0.52   |
| IPI00018274       | EGRF Isoform 1 of Epidermal growth factor receptor precursor                        | GSHQISLNDPpYQQDFFPK               | Y172         | 0                                                       | 1.20  | 0.84   |
| IPI00016910       | EIF3C Eukaryotic translation initiation factor 3 subunit 8                          | QGTpYGGYFR                        | Y881         | 0                                                       | 0.60  | 0.65   |
| IPI00165477       | ELP3 Isoform 1 of Elongator complex protein 3                                       | NLHDALSGHSTNpYEAVK                | Y202         | 0                                                       | -0.04 | -0.92  |
| IPI00032003       | EMD Emerin                                                                          | GYNDpYEEYSFTTR                    | Y94          | 0                                                       | 1.36  | 1.18   |
| IPI00465248       | ENO1 Isoform alpha-enolase of Alpha-enolase                                         | AAVPSGASTGpYEALELR                | Y44          | 0                                                       | 0.00  | 0.15   |
| IPI00294250       | EPHA1 Ephrin type-A receptor 1 precursor                                            | ILLDFDGTpYETGGGK                  | Y781         | 0                                                       | 1.39  | 1.46   |
| IPI00021267       | EPHA2 Ephrin type-A receptor 2 precursor                                            | QSPEDpYFSK                        | Y575         | 0                                                       | 0.82  | 0.94   |
| IPI00021267       | EPHA2 Ephrin type-A receptor 2 precursor                                            | SEQLKLPkTYVDPHTpYEDPNQAVLK        | T587, Y594   | 0                                                       | 0.95  | 1.22   |
| IPI00021267       | EPHA2 Ephrin type-A receptor 2 precursor                                            | TpYVDPHTYEDPNQAVLK                | Y588         | 0                                                       | 0.06  | 0.15   |
| IPI00021267       | EPHA2 Ephrin type-A receptor 2 precursor                                            | VLEDDPEATpYTTSGVK                 | Y772         | 0                                                       | 1.21  | 1.11   |
| IPI00008318       | EPHA4 Ephrin type-A receptor 4 precursor                                            | TYVDFPTpYEDPNQAVR                 | Y602         | 0                                                       | 0.11  | 0.34   |
| IPI00008318       | EPHA4 Ephrin type-A receptor 4 precursor                                            | VLEDDPEAApYTR                     | Y779         | 0                                                       | 0.75  | 0.76   |
| IPI00016645       | EPHA7 Isoform 1 of Ephrin type-A receptor 7 precursor                               | TpYDPEYEDPNRAVHQFAK               | Y608         | 0                                                       | 0.05  | 0.37   |

|             |                                                                            |                             |              |       |       |       |
|-------------|----------------------------------------------------------------------------|-----------------------------|--------------|-------|-------|-------|
| IP100016645 | EPHA7 Isoform 1 of Ephrin type-A receptor 7 precursor                      | TYIDPETpYEDPNR              | Y614         | 0     | 0.80  | 0.76  |
| IP100016645 | EPHA7 Isoform 1 of Ephrin type-A receptor 7 precursor                      | VIEDDPEAVpYTTTGGKIPVR       | Y791         | 0     | 0.71  | 0.73  |
| IP100008315 | EPHB1 Isoform 1 of Ephrin type-B receptor 1 precursor                      | EAVpYSDKLQHYSTGR            | Y575         | 0     | 0.99  | 0.61  |
| IP100008315 | EPHB1 Isoform 1 of Ephrin type-B receptor 1 precursor                      | YLDDTSDPTpYTSLSGGKIPVR      | Y778         | 0     | 0.40  | 0.34  |
| IP100021275 | EPHB2 Isoform 1 of Ephrin type-B receptor 2 precursor                      | FLEDDTSDPTpYTSALGGK         | Y780         | 0     | 0.35  | 0.21  |
| IP100021275 | EPHB2 Isoform 1 of Ephrin type-B receptor 2 precursor                      | IYIDPFPpYEDPNEAVR           | Y602         | 0     | -0.26 | -0.01 |
| IP100289329 | EPHB3 Ephrin type-B receptor 3 precursor                                   | FLEDDPSPDPTpYTSLSGGK        | Y792         | 0     | 0.51  | 0.33  |
| IP100289329 | EPHB3 Ephrin type-B receptor 3 precursor                                   | VYIDPFPpYEDPNEAVR           | Y614         | 0     | 1.22  | 1.19  |
| IP100186826 | EPHB4 Ephrin receptor                                                      | EAEpYSDKHGQYLIGHGTK         | Y574         | 0     | 1.79  | 1.90  |
| IP100186826 | EPHB4 Ephrin receptor                                                      | FLEENSDPTpYTSLSGGK          | Y774         | 0     | 1.73  | 1.47  |
| IP100186826 | EPHB4 Ephrin receptor                                                      | SQAKPGTGGTGGPAPQpY          | Y935         | 0     | 1.73  | 1.95  |
| IP100300384 | ERBB2 Receptor tyrosine-protein kinase erbB-2 precursor                    | LLDIDETpYHADGGKVPK          | Y877         | 0     | 2.96  | 1.69  |
| IP100438286 | ERBB2IP Isoform 1 of Protein LAP2 (Ebrin)                                  | AQIPEGDpYLSVR               | Y1104        | 0     | 1.28  | 1.00  |
| IP100298285 | ERBB3 Isoform 1 of Receptor tyrosine-protein kinase erbB-3 precursor       | AFGGPGHQAPHVpYAR            | Y1307        | 0     | 2.05  | 2.48  |
| IP100001754 | F11R Junctional adhesion molecule A precursor                              | VlpYQSARS                   | Y280         | 0     | 0.99  | 2.07  |
| IP100171499 | FAM59A Isoform 3 of Protein FAM59A                                         | QWTTITAHSELEEGHYPVIGPK      | Y74          | 0     | 1.70  | 1.12  |
| IP100029263 | FER Proto-oncogene tyrosine-protein kinase FER                             | QEDGGpYSSSGLK               | Y714         | 0     | 2.17  | 1.85  |
| IP100005142 | FGFR1 Isoform 1 of Basic fibroblast growth factor receptor 1 precursor     | DIHHDpYpYKK                 | Y653; Y654   | 0     | 1.68  | 2.26  |
| IP100005142 | FGFR1 Isoform 1 of Basic fibroblast growth factor receptor 1 precursor     | DIHHDpYpYKK                 | Y653         | 0     | 1.82  | 0.97  |
| IP100005142 | FGFR1 Isoform 1 of Basic fibroblast growth factor receptor 1 precursor     | RPPGLEpYCNVPSHNPPEQLSSK     | Y583         | 0     | 1.67  | 1.69  |
| IP100010680 | FGFR2 Isoform 1 of Fibroblast growth factor receptor 2 precursor           | DINNIpYpYKK                 | Y656; Y657   | 0     | 1.28  | 1.42  |
| IP100010680 | FGFR2 Isoform 1 of Fibroblast growth factor receptor 2 precursor           | DINNIpYpYKK                 | Y656         | 0     | -0.36 | -1.67 |
| IP100010680 | FGFR2 Isoform 1 of Fibroblast growth factor receptor 2 precursor           | RPPGMEpYSDINRVPEEQMTFK      | Y586         | 0     | 1.29  | 1.22  |
| IP100027174 | FGFR3 Isoform 1 of Fibroblast growth factor receptor 3 precursor           | DVHNLDpYpYKK                | Y647         | 0     | 1.19  | 0.97  |
| IP100304578 | FGFR4 Fibroblast growth factor receptor 4 precursor                        | GVHHDpYpYKK                 | Y642         | 0     | 1.44  | 2.49  |
| IP100784186 | FLJ32810 similar to Oligophrenin 1 Isoform 1                               | LDTASSNGpYQRPSVVAAK         | Y405         | 0     | -0.26 | -0.07 |
| IP100027438 | FLOT1 Flotillin-1                                                          | YSAQpYLSEIEMAK              | Y203         | 0     | -0.07 | -0.05 |
| IP100644865 | FRMD4A FERM domain containing 4A                                           | SLESDQEGHpYSVK              | Y861         | 0     | 0.50  | 0.59  |
| IP100031068 | GAB1 Isoform 1 of GRB2-associated-binding protein 1                        | APSAVSDSLpYNLPR             | Y259         | 0     | 0.72  | 1.29  |
| IP100031068 | GAB1 Isoform 1 of GRB2-associated-binding protein 1                        | DASSQDpYDIPR                | Y406         | 0     | 0.89  | 1.65  |
| IP100031068 | GAB1 Isoform 1 of GRB2-associated-binding protein 1                        | SSGSSVADERVPpYVVVDQQK       | Y659         | 0     | 2.90  | 3.76  |
| IP100186990 | GAB2 Isoform 1 of GRB2-associated-binding protein 2                        | ASSCETpYEPYR                | Y409         | 0     | 1.66  | 0.80  |
| IP100186990 | GAB2 Isoform 1 of GRB2-associated-binding protein 2                        | GSLSSETDNEVDYTFK            | Y293         | 0     | 1.27  | 0.45  |
| IP100186990 | GAB2 Isoform 1 of GRB2-associated-binding protein 2                        | HNTFERDSTpYDLPR             | Y266         | 0     | 0.82  | 0.13  |
| IP100218487 | GJA1 Gap junction alpha-1 protein                                          | QASEQNWANpYSAEQNR           | Y313         | 0     | 0.68  | 0.77  |
| IP100218487 | GJA1 Gap junction alpha-1 protein                                          | SDPpYHATSGALSPAK            | Y247         | 0     | 0.30  | 0.14  |
| IP100004901 | GPRC5C CDNA FLJ20242 fis, clone COLF6369                                   | VPSGAPpYDILPR               | Y113         | 0     | 1.09  | 0.79  |
| IP100099883 | GPRC5C G-protein coupled receptor family C group 5 member C precursor      | NSQVFRNpYVVD                | Y438         | 0     | 0.94  | 1.02  |
| IP100334715 | GRL1 Isoform 1 of Glucocorticoid receptor DNA-binding factor 1             | NEEENIpYSPVHDSTQK           | Y1105        | 0     | 0.09  | 0.00  |
| IP100334715 | GRL1 Isoform 1 of Glucocorticoid receptor DNA-binding factor 1             | SVSSSPWLQDQDPSDpYAEPMDAVVPR | Y1087        | 0     | 0.69  | 0.75  |
| IP100028570 | GSK3B Isoform 1 of Glycogen synthase kinase-3 beta                         | GEPNVSpYICpSR               | Y216; S219   | 0     | 0.01  | -0.01 |
| IP100028570 | GSK3B Isoform 1 of Glycogen synthase kinase-3 beta                         | GEPNVSpYICSR                | Y216         | 0     | 0.06  | 0.09  |
| IP100219757 | GSTP1 Glutathione S-transferase P                                          | YISLpYTYEAGKDDYVK           | Y109         | 0     | 0.19  | 0.23  |
| IP100054004 | hCG_1790474 Uncharacterized protein ENSP00000354428                        | YFDSDGpYNNMAK               | Y65          | 0     | 2.48  | 1.69  |
| IP100029769 | HCK Isoform p59-HCK of Tyrosine-protein kinase HCK                         | TLDNGDpYISPR                | Y188         | 0     | -0.34 | -0.24 |
| IP100006176 | HGS Hepatocyte growth factor-regulated tyrosine kinase substrate           | pYKVVQDTPQIMK               | Y125         | 0     | 0.56  | -0.17 |
| IP100006176 | HGS Hepatocyte growth factor-regulated tyrosine kinase substrate           | VVQDTPQIMK                  | Y132         | 0     | 0.30  | -0.07 |
| IP100215949 | HIPK2 Isoform 2 of Homeodomain-interacting protein kinase 2                | AVCSTpYLQSR                 | Y361; S364   | 0     | 0.42  | 0.12  |
| IP100215949 | HIPK2 Isoform 2 of Homeodomain-interacting protein kinase 2                | AVCSTpYLQSR                 | Y361         | 0     | 0.04  | 0.14  |
| IP100099522 | HIPK3 Isoform 1 of Homeodomain-interacting protein kinase 3                | TVCTSTpYLQSR                | Y359         | 0     | -2.59 | -1.94 |
| IP100018534 | HIST1H2BL Histone H2B type 1-L                                             | EVSVVpYpYK                  | Y43          | 0     | 0.06  | 0.06  |
| IP100453473 | HIST1H4A,HIST1H4K,HIST1H4J,HIST1H4D,HIST1H4E,HIST1H4H,HIST1H4C,ISGL1pYEETR | Y52                         | 0            | -0.10 | 0.02  |       |
| IP100215965 | HNRNP1 Isoform A1-B of Heterogeneous nuclear ribonucleoprotein A1          | NQGGpYGGSSSSSYGSGR          | Y357         | 0     | 1.65  | 3.12  |
| IP100215965 | HNRNP1 Isoform A1-B of Heterogeneous nuclear ribonucleoprotein A1          | SSGpYGGGGQpYFAKPR           | Y347         | 0     | 2.02  | 1.97  |
| IP100419373 | HNRPA3 Isoform 1 of Heterogeneous nuclear ribonucleoprotein A3             | SSGpYGGGGpYGGSSGGYSGR       | Y364         | 0     | 1.49  | 1.50  |
| IP100013877 | HNRPH3 Isoform 1 of Heterogeneous nuclear ribonucleoprotein H3             | D3MDNQGpYGSVGR              | Y296         | 0     | 1.33  | 1.26  |
| IP100005038 | HRSP12 Ribonuclease UK114                                                  | AApYQVAALPK                 | Y110         | 0     | -0.27 | -0.35 |
| IP100784154 | HSPD1 60 kDa heat shock protein, mitochondrial precursor                   | GYSPpYFINTSK                | Y241         | 0     | -0.08 | 0.24  |
| IP100027232 | IGF1R Insulin-like growth factor 1 receptor precursor                      | ASFDERQpYAHMNGGR            | Y1346        | 0     | 2.76  | 2.19  |
| IP100016932 | INPL1 Isoform 1 of Phosphatidylinositol-3,4,5-trisphosphate 5-phosphatase  | TLSEVDpYAPAGPAR             | Y1168        | 0     | 0.73  | 0.63  |
| IP100025803 | INSR Insulin receptor                                                      | DipYETDpYpYK                | Y1205; Y1209 | 0     | 1.93  | 1.42  |
| IP100025803 | INSR Insulin receptor                                                      | DipYETDpYpYK                | Y1205        | 0     | 0.74  | 0.28  |
| IP100025803 | INSR Insulin receptor                                                      | DIYETDpYpYK                 | Y1209; Y1210 | 0     | 1.86  | 1.21  |
| IP100025803 | INSR Insulin receptor                                                      | DIYETDpYpYK                 | Y1209        | 0     | 0.79  | 0.60  |
| IP100464978 | IRS2 Insulin receptor substrate 2 insertion mutant (Fragment)              | APpYTCGGDSDQVYLMSSPVGR      | Y816         | 0     | 1.22  | 0.52  |
| IP100464978 | IRS2 Insulin receptor substrate 2 insertion mutant (Fragment)              | ApSSPAESSPEDSGpYMR          | S731; Y744   | 0     | 1.47  | 1.06  |
| IP100464978 | IRS2 Insulin receptor substrate 2 insertion mutant (Fragment)              | APYTCGGDSDQpVYLMSSPVGR      | Y825         | 0     | 1.21  | 0.63  |
| IP100464978 | IRS2 Insulin receptor substrate 2 insertion mutant (Fragment)              | ASSPAESSPEDSGpYMR           | Y744         | 0     | 0.89  | 0.10  |
| IP100464978 | IRS2 Insulin receptor substrate 2 insertion mutant (Fragment)              | GVPGGCPpYSSLPR              | Y805         | 0     | 1.88  | 0.77  |
| IP100464978 | IRS2 Insulin receptor substrate 2 insertion mutant (Fragment)              | SDDpYMPMSpASVASPK           | Y677         | 0     | 1.07  | 0.39  |
| IP100464978 | IRS2 Insulin receptor substrate 2 insertion mutant (Fragment)              | QRVPQPSSASLDEpYTLMR         | Y600         | 0     | 0.18  | -1.56 |
| IP100464978 | IRS2 Insulin receptor substrate 2 insertion mutant (Fragment)              | SPLSDpYMNLDpFSSPK           | Y980         | 0     | 1.83  | -0.19 |
| IP100464978 | IRS2 Insulin receptor substrate 2 insertion mutant (Fragment)              | VAYHPYEDpYGDIEIGSHR         | Y634         | 0     | 2.78  | 1.79  |
| IP100216423 | ITSN2 Isoform 4 of Intersectin-2                                           | UlpYLVEPK                   | Y552         | 0     | 0.51  | 0.65  |
| IP100021396 | KDR Vascular endothelial growth factor receptor 2 precursor                | FHpYDNTAGISQYLQNSK          | Y1214        | 0     | 2.29  | 1.75  |
| IP100103018 | KIAA1217 Uncharacterized protein KIAA1217                                  | NEGFpYADPpLYHEGR            | Y393         | 0     | 0.96  | 0.97  |
| IP100103018 | KIAA1217 Uncharacterized protein KIAA1217                                  | NVpYVELNDVR                 | Y244         | 0     | -0.13 | -0.11 |
| IP100455851 | KIAA1688 KIAA1688 protein                                                  | SGDpYSTMEGPELR              | Y448         | 0     | -0.24 | 0.13  |
| IP100470360 | KIRREL Isoform 1 of Kin of IRRE-like protein 1 precursor                   | AVLpYADYR                   | Y622         | 0     | 1.81  | 3.93  |
| IP100470360 | KIRREL Isoform 1 of Kin of IRRE-like protein 1 precursor                   | TPYEApYDPIGK                | Y724         | 0     | 0.96  | 0.88  |
| IP100253050 | Y                                                                          | EIPFSPYLVDGSGK              | Y513         | 0     | 1.11  | 1.29  |
| IP100014172 | LAPTM4A Lysosomal-associated transmembrane protein 4A                      | MPEKEPPPPpYLP               | Y230         | 0     | 0.72  | 0.69  |
| IP100394952 | LCK Isoform Long of Proto-oncogene tyrosine-protein kinase LCK             | LIEDNEpYIAR                 | Y499         | 0     | 0.26  | 0.04  |
| IP100394952 | LCK Isoform Long of Proto-oncogene tyrosine-protein kinase LCK             | NLDNGGpYISPR                | Y192         | 0     | -0.32 | -0.12 |
| IP100394952 | LCK Isoform Long of Proto-oncogene tyrosine-protein kinase LCK             | SVLEDFTTATEGQpYQPPQ         | Y593         | 0     | 0.14  | 0.42  |
| IP100217966 | LDHA Isoform 1 of L-lactate dehydrogenase A chain                          | EVHKQVESAAGpYEVK            | Y268         | 0     | 0.02  | 0.00  |

|             |                                                                                                |                                  |            |   |       |       |
|-------------|------------------------------------------------------------------------------------------------|----------------------------------|------------|---|-------|-------|
| IP100219217 | LDHB L-lactate dehydrogenase B chain                                                           | MVVESApYEVK                      | Y240       | 0 | 0.03  | 0.46  |
| IP100017562 | LPHN2 Isoform 2 of Lathrophilin-2 precursor                                                    | SENEdipYK                        | Y1350      | 0 | 0.76  | 0.37  |
| IP100023704 | LPP Lipoma-preferred partner                                                                   | NDSDPtPYGQQGHNTWK                | Y317       | 0 | 1.56  | 1.45  |
| IP100023704 | LPP Lipoma-preferred partner                                                                   | YVEGYPyAAGPGYGR                  | Y301       | 0 | 1.34  | 1.39  |
| IP100478892 | LRIG2 Leucine-rich repeats and immunoglobulin-like domains protein 2 precursor                 | VICSDCYDNANipYSR                 | Y912       | 0 | 1.55  | 1.31  |
| IP100328218 | LSR Isoform 2 of Lipolysis-stimulated lipoprotein receptor                                     | AATSGVPSipYAPSTYAHLSPAK          | Y286       | 0 | 0.15  | 0.24  |
| IP100328218 | LSR Isoform 2 of Lipolysis-stimulated lipoprotein receptor                                     | CCCPALpYAAGK                     | Y272       | 0 | 0.60  | 0.31  |
| IP100328218 | LSR Isoform 2 of Lipolysis-stimulated lipoprotein receptor                                     | VLpYYMEK                         | Y348       | 0 | 0.65  | 0.45  |
| IP100298625 | LYN Isoform LYN A of Tyrosine-protein kinase Lyn                                               | SLDNGGpYYISPR                    | Y193       | 0 | -0.37 | -0.23 |
| IP100298625 | LYN Isoform LYN A of Tyrosine-protein kinase Lyn                                               | VIENEpYAR                        | Y397       | 0 | 1.00  | 0.88  |
| IP100165946 | MAG1 Isoform 2 of Membrane-associated guanylate kinase, WW and PDZ domain-containing protein 1 | IEDPVpYGIYYVDHNR                 | Y413       | 0 | 0.41  | 0.55  |
| IP100165946 | MAG1 Isoform 2 of Membrane-associated guanylate kinase, WW and PDZ domain-containing protein 1 | IEDPVYGIpYVDHNRK                 | Y416       | 0 | 0.29  | 0.44  |
| IP100170865 | MAG3 Membrane-associated guanylate kinase, WW and PDZ domain-containing protein 3              | IEDPQYGTpYYVHNLNQK               | Y396       | 0 | -0.04 | -0.80 |
| IP100003479 | MAPK1 Mitogen-activated protein kinase 1                                                       | VADPDHDHPTGFLTEpYVATR            | Y187       | 0 | 1.41  | 2.31  |
| IP100019473 | MAPK11 Mitogen-activated protein kinase 11                                                     | QADEEMTGPYVATR                   | T176, Y182 | 0 | 0.44  | 1.00  |
| IP100296283 | MAPK12 Mitogen-activated protein kinase 12                                                     | QAQDEMTGPYVATR                   | Y185       | 0 | 1.33  | 1.02  |
| IP100005741 | MAPK13 Mitogen-activated protein kinase 13                                                     | HADAEMTGPYVATR                   | Y182       | 0 | 1.74  | 1.44  |
| IP100002857 | MAPK14 Isoform CSBP2 of Mitogen-activated protein kinase 14                                    | HTDDEMTGPYVATR                   | Y182       | 0 | 0.13  | 0.71  |
| IP100002857 | MAPK14 Isoform CSBP2 of Mitogen-activated protein kinase 14                                    | HTDDEMTGPYVATR                   | Y182       | 0 | 0.81  | 1.13  |
| IP100018195 | MAPK3 Mitogen-activated protein kinase 3                                                       | IADPEHDHPTGFLTEpYVATR            | Y204       | 0 | 1.17  | 2.29  |
| IP100018195 | MAPK3 Mitogen-activated protein kinase 3                                                       | IADPEHDHPTGFLTEpYVATR            | T198, Y204 | 0 | 0.98  | 2.06  |
| IP100018195 | MAPK3 Mitogen-activated protein kinase 3                                                       | IADPEHDHPTGFLTEpYVATR            | T202, Y204 | 0 | 1.26  | 1.13  |
| IP100149048 | MAPK7 mitogen-activated protein kinase 7 isoform 2                                             | GLCTSPAHEQYFMTEpYVATR            | Y82        | 0 | 0.86  | 2.60  |
| IP100149048 | MAPK7 mitogen-activated protein kinase 7 isoform 2                                             | GLCTSPAHEQYFMTEpYVATR            | Y82        | 0 | 0.37  | 2.55  |
| IP100003145 | MAPK8 Isoform 1 of Mitogen-activated protein kinase 8                                          | TAGTSMFMTGPYVATR                 | Y185       | 0 | -0.03 | -0.20 |
| IP100024673 | MAPK9 Isoform Alpha-2 of Mitogen-activated protein kinase 9                                    | TACTNFMTGPYVATR                  | Y185       | 0 | 0.30  | 0.27  |
| IP100064607 | MEGF10 Isoform 1 of Multiple epidermal growth factor-like domains 10 protein 10                | DSPpYAEINNSTSANR                 | Y1061      | 0 | 2.40  | 1.92  |
| IP100064607 | MEGF10 Isoform 1 of Multiple epidermal growth factor-like domains 10 protein 10                | LSQDPpYDLPK                      | Y1099      | 0 | 2.36  | 1.61  |
| IP100064607 | MEGF10 Isoform 1 of Multiple epidermal growth factor-like domains 10 protein 10                | NSHPCHpYDLPVR                    | Y1111      | 0 | 2.44  | 1.82  |
| IP100064607 | MEGF10 Isoform 1 of Multiple epidermal growth factor-like domains 10 protein 10                | SSECGpYVEMK                      | Y1048      | 0 | 2.82  | 2.45  |
| IP100643785 | MLLT4 Myeloid/lymphoid or mixed-lineage leukemia 4 (Trithorax homolog)                         | YSLpYEVHVSGEER                   | Y76        | 0 | -0.35 | -0.14 |
| IP100022558 | MPZL1 Isoform 1 of Myelin protein zero-like protein 1 precursor                                | SESVPpYADIR                      | Y263       | 0 | 0.62  | 0.81  |
| IP100022558 | MPZL1 Isoform 1 of Myelin protein zero-like protein 1 precursor                                | SLPSGSHQGPVipYLAQLDHSGGHSDK      | Y241       | 0 | 0.69  | 0.86  |
| IP100397526 | MYH10 Isoform 1 of Myosin-10                                                                   | ALApYDKLEK                       | Y1415      | 0 | 0.35  | 0.30  |
| IP100397526 | MYH10 Isoform 1 of Myosin-10                                                                   | AVipYNPATQADWTAK                 | Y22        | 0 | 1.04  | 1.16  |
| IP100289258 | MYO10 Myosin-X                                                                                 | CSVGTpYNSSGAYR                   | Y1164      | 0 | 1.61  | 0.46  |
| IP100004500 | N4BP3 NEDD4-binding protein 3                                                                  | NEPADpYATLYR                     | Y83        | 0 | -0.31 | -0.51 |
| IP100031407 | NEDD9 Enhancer of filamentation 1                                                              | TGHVpYVEYPSR                     | Y166       | 0 | -0.17 | 0.01  |
| IP100101049 | NMD3 CGI-07 protein                                                                            | LISQDHSNtpYNYK                   | Y236       | 0 | 2.04  | 1.56  |
| IP100003373 | OCLN Occludin                                                                                  | FYPESPpYK                        | Y342       | 0 | 1.26  | 1.20  |
| IP100003373 | OCLN Occludin                                                                                  | SNLWDKHEHpYDEQPPNVEEWVK          | Y287       | 0 | -0.42 | 0.16  |
| IP100045423 | PARD3 Isoform 7 of Partitioning-defective 3 homolog                                            | DVTIGSSAPpYVK                    | Y489       | 0 | -0.01 | -0.11 |
| IP100045423 | PARD3 Isoform 7 of Partitioning-defective 3 homolog                                            | EGHMMDALpYAKVK                   | Y1044      | 0 | -0.26 | -0.41 |
| IP100045423 | PARD3 Isoform 7 of Partitioning-defective 3 homolog                                            | FSPDSQpYDNR                      | Y388       | 0 | 0.01  | -0.04 |
| IP100045423 | PARD3 Isoform 7 of Partitioning-defective 3 homolog                                            | ISHSLpYSGIGLDESPSR               | Y706       | 0 | -0.08 | 0.07  |
| IP100007935 | PDLIM5 PDZ and LIM domain protein 5                                                            | YTEFpYHPTVSHDASK                 | Y251       | 0 | 0.88  | 0.75  |
| IP100292056 | PIK3C2B Phosphatidylinositol-4-phosphate 3-kinase C2 domain-containing protein 2B              | YVSDpYDGINDAITR                  | Y228       | 0 | 1.30  | 1.54  |
| IP100031386 | PIK3CA Phosphatidylinositol-4,5-bisphosphate 3-kinase catalytic subunit alpha                  | EAGFSYpYSHAGLSNR                 | Y564       | 0 | 2.62  | 0.63  |
| IP100011736 | PIK3R2 Phosphatidylinositol 3-kinase regulatory subunit beta                                   | EYDQpYEEYTR                      | Y464       | 0 | -0.16 | -0.05 |
| IP100005264 | PKP2 Isoform 2 of Plakophilin-2                                                                | AHTYHSDpYQVSQR                   | Y166       | 0 | 1.32  | 1.99  |
| IP100026952 | PKP3 Plakophilin-3                                                                             | GQpYHTLQAGFSSR                   | Y84        | 0 | 1.22  | 1.02  |
| IP100021076 | PKP4 Isoform Long of Plakophilin-4                                                             | LQHQQLpYQSODSNR                  | Y1115      | 0 | 0.98  | 1.31  |
| IP100021076 | PKP4 Isoform Long of Plakophilin-4                                                             | LYLQSPHSpYEDPYFDDR               | Y1139      | 0 | 0.97  | 0.83  |
| IP100021076 | PKP4 Isoform Long of Plakophilin-4                                                             | NNpYALNTATYAEpYRPIQYR            | Y470       | 0 | 1.06  | 1.09  |
| IP100021076 | PKP4 Isoform Long of Plakophilin-4                                                             | SAVPpYHITPipYEGR                 | Y415       | 0 | 0.25  | 0.44  |
| IP100021076 | PKP4 Isoform Long of Plakophilin-4                                                             | SPNHGTVELQSGTALpYR               | Y443       | 0 | 0.80  | 0.73  |
| IP100021076 | PKP4 Isoform Long of Plakophilin-4                                                             | STTNPpYDFYSTK                    | Y1168      | 0 | 0.96  | 0.84  |
| IP100021076 | PKP4 Isoform Long of Plakophilin-4                                                             | TVHDMEQFGQQQpYDIYER              | Y369       | 0 | 0.90  | 0.99  |
| IP100021076 | PKP4 Isoform Long of Plakophilin-4                                                             | TVHDMEQFGQQQpYDIYER              | Y372       | 0 | 0.41  | 0.78  |
| IP100021076 | PKP4 Isoform Long of Plakophilin-4                                                             | TpYpYPSYR                        | Y421       | 0 | 0.63  | 0.62  |
| IP100016736 | PLCG1 1-phosphatidylinositol-4,5-bisphosphate phosphodiesterase gamma 1                        | AcPpYRDMSSFPETK                  | Y1018      | 0 | 0.11  | 0.30  |
| IP100016736 | PLCG1 1-phosphatidylinositol-4,5-bisphosphate phosphodiesterase gamma 1                        | IGTAEPDpYALYEGR                  | Y812       | 0 | 2.07  | 1.13  |
| IP100016736 | PLCG1 1-phosphatidylinositol-4,5-bisphosphate phosphodiesterase gamma 1                        | LAEGSApYEVPTSMMPpYSEINDSNIK      | Y522       | 0 | 0.06  | 1.13  |
| IP100016736 | PLCG1 1-phosphatidylinositol-4,5-bisphosphate phosphodiesterase gamma 1                        | NPGFpYVEANPMPPTFK                | Y824       | 0 | 1.45  | 1.29  |
| IP100014898 | PLEC1 Isoform 1 of Plectin-1                                                                   | GYSPpYVSGSGSTAGSR                | Y4615      | 0 | 2.00  | 1.94  |
| IP100007248 | PLEKH46 Plectstrin homology domain-containing family A member 6                                | SEDIpYADPAAYVMR                  | Y492       | 0 | 0.46  | 0.51  |
| IP100419933 | PLEKH47 Isoform 1 of Plectstrin homology domain-containing family A member 7                   | QSPGQSLSPENpYQLTPK               | Y470       | 0 | 0.60  | 0.79  |
| IP100419933 | PLEKH47 Isoform 1 of Plectstrin homology domain-containing family A member 7                   | SADDTpYLQLK                      | Y656       | 0 | 0.25  | 0.03  |
| IP100439948 | PPP1R13L Isoform 1 of RelA-associated inhibitor                                                | TPLYLQDPpYVGLSLDR                | Y132       | 0 | 0.61  | 1.52  |
| IP100739386 | PRAGMIN Tyrosine-protein kinase SgK223                                                         | CLGLTGEPPpYAEATK                 | Y413       | 0 | 0.50  | 0.51  |
| IP100739386 | PRAGMIN Tyrosine-protein kinase SgK223                                                         | CPPApYTMVGLHMLEPR                | Y159       | 0 | 0.07  | 0.10  |
| IP100739386 | PRAGMIN Tyrosine-protein kinase SgK223                                                         | QEDAPVpYVLSFR                    | Y132       | 0 | 0.57  | 0.71  |
| IP100013721 | PRPF4B Serine/threonine-protein kinase PRP4 homolog                                            | ICDFGSAHVADNDITpYLVSR            | Y849       | 0 | 0.17  | 0.30  |
| IP100219622 | PSMA2 Proteasome subunit alpha type-2                                                          | HIGLpYVSGMGPYR                   | Y76        | 0 | -0.31 | -0.70 |
| IP100012885 | PTK2 Isoform 1 of Focal adhesion kinase 1                                                      | GSIDREGLSQGPIGNQHpYQVPGKPDPAAPPK | Y861       | 0 | 0.85  | 0.34  |
| IP100012885 | PTK2 Isoform 1 of Focal adhesion kinase 1                                                      | pYMEDpSTYKASK                    | Y570, Y574 | 0 | 1.11  | 1.03  |
| IP100012885 | PTK2 Isoform 1 of Focal adhesion kinase 1                                                      | pYMEDSTpYKASK                    | Y570, Y576 | 0 | 1.27  | 0.92  |
| IP100012885 | PTK2 Isoform 1 of Focal adhesion kinase 1                                                      | pYMEDSTYKASK                     | Y570       | 0 | 0.96  | 0.94  |
| IP100012885 | PTK2 Isoform 1 of Focal adhesion kinase 1                                                      | THAVpSVSDDYAEIIDEEDTpYTMPSTR     | S390, Y407 | 0 | 0.65  | 1.07  |
| IP100012885 | PTK2 Isoform 1 of Focal adhesion kinase 1                                                      | YMEDpSTYKASK                     | Y576, Y574 | 0 | 0.22  | -0.17 |
| IP100012885 | PTK2 Isoform 1 of Focal adhesion kinase 1                                                      | YMEDSpTYKASK                     | T575, Y576 | 0 | 1.12  | 1.05  |
| IP100012885 | PTK2 Isoform 1 of Focal adhesion kinase 1                                                      | YMEDSpTYKASK                     | T575, Y577 | 0 | 1.37  | 1.08  |
| IP100012885 | PTK2 Isoform 1 of Focal adhesion kinase 1                                                      | YMEDSTpYKASK                     | Y576, Y577 | 0 | 1.28  | 0.93  |
| IP100012885 | PTK2 Isoform 1 of Focal adhesion kinase 1                                                      | YMEDSTpYKASK                     | Y576       | 0 | 1.31  | 0.97  |
| IP100298347 | PTPN11 Isoform 2 of Tyrosine-protein phosphatase non-receptor type 11                          | LQNTGDPYDLYGGEK                  | Y62        | 0 | 0.18  | -0.11 |
| IP100221067 | PTPRA Isoform 2 of Receptor-type tyrosine-protein phosphatase alpha precursor                  | LVQEVIDAFSDpYANFK                | Y789       | 0 | 0.89  | 1.03  |
| IP100107819 | PTPRD PTPRD protein                                                                            | AALYVLSFDHpYAT                   | Y1504      | 0 | 2.07  | 1.50  |
| IP100023974 | PTTG1P Pituitary tumor-transforming gene 1 protein-interacting protein 1                       | YGLFKEENpYAR                     | Y174       | 0 | 1.31  | 0.95  |
