# Supplementary material for: Tyrosine Phosphorylation Profiling in FGF-2 Stimulated Human Embryonic Stem Cells
Source: PubMed Central journal article supplement (PMC3060089; doi:10.1371/journal.pone.0017538), 2011-03-17
Supplement: pone.0017538.s007.pdf [file pone.0017538.s007.pdf]

**Cluster 1**

| IPI accession no. | Phosphopeptides                   | 0 min | 5 min | 15 min | Protein                                                              |
|-------------------|-----------------------------------|-------|-------|--------|----------------------------------------------------------------------|
| IPI00337612       | AVSALATESGHGHPDSQKPPTHGTSDSpYSAPR | 0     | -1.04 | -1.09  | DCBLD1 Discoidin, CUB and LCCL domain-containing protein 1 precursor |
| IPI00010680       | DINNIDpYYKK                       | 0     | -0.36 | -1.67  | FGFR2 Isoform 1 of Fibroblast growth factor receptor 2 precursor     |
| IPI00099522       | TVCSTpYLQSR                       | 0     | -2.59 | -1.94  | HIPK3 Isoform 1 of Homeodomain-interacting protein kinase 3          |
| IPI00464978       | QRVPVPQSSASLDEpYTLMR              | 0     | 0.18  | -1.56  | IRS2 Insulin receptor substrate 2 insertion mutant (Fragment)        |

**Cluster 2**

| IPI accession no. | Phosphopeptides               | 0 min | 5 min | 15 min | Protein                                                                       |
|-------------------|-------------------------------|-------|-------|--------|-------------------------------------------------------------------------------|
| IPI00219725       | HYEDGYPGGSDNpYGSLSR           | 0     | 1.04  | 1.21   | CTNND1 Isoform 2AB of Catenin delta-1                                         |
| IPI00219725       | QDVpYGPQPQVR                  | 0     | 0.99  | 1.23   | CTNND1 Isoform 2AB of Catenin delta-1                                         |
| IPI00023343       | DNEVDGQDpYHFVVS               | 0     | 0.26  | 1.14   | DLG3 Disks large homolog 3                                                    |
| IPI00641459       | STTTGHLIpYK                   | 0     | 0.73  | 1.26   | EEF1A1 Similar to Elongation factor 1 alpha                                   |
| IPI00021267       | SEQLKPLKpTYVDPHpTYEDPNQAVLK   | 0     | 0.95  | 1.22   | EPHA2 Ephrin type-A receptor 2 precursor                                      |
| IPI00031068       | APSASVDSSLpYNLPR              | 0     | 0.72  | 1.29   | GAB1 Isoform 1 of GRB2-associated-binding protein 1                           |
| IPI00031068       | DASSQDCpYDIPR                 | 0     | 0.89  | 1.65   | GAB1 Isoform 1 of GRB2-associated-binding protein 1                           |
| IPI00099883       | NSQVFRNpYVWD                  | 0     | 0.94  | 1.02   | GPRC5C G-protein coupled receptor family C group 5 member C precursor         |
| IPI00253050       | EIPFSpYLVGDSGK                | 0     | 1.11  | 1.29   | L1TD1 LINE-1 type transposase domain-containing protein 1                     |
| IPI00019473       | QADEEMTGpYVATR                | 0     | 0.44  | 1.00   | MAPK11 Mitogen-activated protein kinase 11                                    |
| IPI00002857       | HTDDEMTGpYVATR                | 0     | 0.81  | 1.13   | MAPK14 Isoform CSBP2 of Mitogen-activated protein kinase 14                   |
| IPI00149048       | GLCTSPAHEQYFMpTEpYVATR        | 0     | 0.86  | 2.60   | MAPK7 mitogen-activated protein kinase 7 isoform 2                            |
| IPI00149048       | GLCTSPAHEQYFMTEpYVATR         | 0     | 0.37  | 2.55   | MAPK7 mitogen-activated protein kinase 7 isoform 2                            |
| IPI00397526       | AVIpYYPATQADWTAK              | 0     | 1.04  | 1.16   | MYH10 Isoform 1 of Myosin-10                                                  |
| IPI00021076       | LQHQLpYYSQDSDNRK              | 0     | 0.98  | 1.31   | PKP4 Isoform Long of Plakophilin-4                                            |
| IPI00021076       | NNpYALNTTATYAEPYRPIQYR        | 0     | 1.06  | 1.09   | PKP4 Isoform Long of Plakophilin-4                                            |
| IPI00016736       | LAEGSAYEEVPTSMMPYSENDISNSIK   | 0     | 0.06  | 1.13   | PLCG1 1-phosphatidylinositol-4,5-bisphosphate phosphodiesterase gamma-1       |
| IPI00439948       | TPLYLQPDAPYGLSDR              | 0     | 0.61  | 1.52   | PPP1R13L Isoform 1 of RelA-associated inhibitor                               |
| IPI00012885       | THAVpSVSETDDYAEIIDEEDpYTMPSTR | 0     | 0.65  | 1.07   | PTK2 Isoform 1 of Focal adhesion kinase 1                                     |
| IPI00221067       | VVQYIDAFSDpYANFK              | 0     | 0.89  | 1.03   | PTPRA Isoform 2 of Receptor-type tyrosine-protein phosphatase alpha precursor |
| IPI00295698       | TVDLDPGLpYVHSV                | 0     | 0.93  | 1.11   | SLC7A3 Cationic amino acid transporter 3                                      |
| IPI00022462       | SAFSNLFGGEPLSpYTR             | 0     | 0.95  | 1.39   | TFRC Transferrin receptor protein 1                                           |
| IPI00335824       | FTPKPpYTSSARPFER              | 0     | 0.96  | 1.51   | TJP1 Isoform Short of Tight junction protein ZO-1                             |
| IPI00003843       | AYDPDpYER                     | 0     | 0.78  | 1.17   | TJP2 Isoform A1 of Tight junction protein ZO-2                                |
| IPI00003843       | SIDQDpYER                     | 0     | 0.55  | 1.55   | TJP2 Isoform A1 of Tight junction protein ZO-2                                |

**Cluster 3**

| IPI accession no. | Phosphopeptides         | 0 min | 5 min | 15 min | Protein                                               |
|-------------------|-------------------------|-------|-------|--------|-------------------------------------------------------|
| IPI00219852       | ADGGAEPYATYQTK          | 0     | 2.74  | 2.14   | CD46 Isoform B of Membrane cofactor protein precursor |
| IPI00023530       | IGEGTpYGTVFK            | 0     | 1.33  | 1.57   | CDK5 Cell division protein kinase 5                   |
| IPI00014197       | KTPQGPEIpYSDTQFPQLQSTAK | 0     | 1.98  | 1.50   | CDV3 Isoform 1 of Protein CDV3 homolog                |
| IPI00219725       | SLDNNpYSTPNER           | 0     | 1.24  | 1.52   | CTNND1 Isoform 2AB of Catenin delta-1                 |
| IPI00026889       | EGVpYDVPK               | 0     | 1.64  | 1.40   | DAB1 Isoform DAB555 of Disabled homolog 1             |
| IPI00024307       | TTENNYCPHpYEK           | 0     | 2.06  | 2.33   | EFNB1 Ephrin-B1 precursor                             |
| IPI00294250       | LLDDFDGTpYETQGGK        | 0     | 1.39  | 1.46   | EPHA1 Ephrin type-A receptor 1 precursor              |
| IPI00186826       | EAEpYSDKHGQYLIGHGTK     | 0     | 1.79  | 1.90   | EPHB4 Ephrin receptor                                 |
| IPI00186826       | FLEENSSDPTpYTSSLGGK     | 0     | 1.73  | 1.47   | EPHB4 Ephrin receptor                                 |
| IPI00186826       | SQAKPGTPGGTGGPAPQpY     | 0     | 1.73  | 1.95   | EPHB4 Ephrin receptor                                 |

|             |                                                              |   |      |      |                                                                                         |
|-------------|--------------------------------------------------------------|---|------|------|-----------------------------------------------------------------------------------------|
| IPI00300384 | LLDIDETE <sub>p</sub> YHADGGKVPIK                            | 0 | 2.96 | 1.69 | ERBB2 Receptor tyrosine-protein kinase erbB-2 precursor                                 |
| IPI00298285 | AFQGGHQA <sub>p</sub> PHV <sub>p</sub> YAR                   | 0 | 2.05 | 2.48 | ERBB3 Isoform 1 of Receptor tyrosine-protein kinase erbB-3 precursor                    |
| IPI00001754 | V <sub>p</sub> YSQSAR                                        | 0 | 0.99 | 2.07 | F11R Junctional adhesion molecule A precursor                                           |
| IPI00029263 | QEDGGV <sub>p</sub> YSSSGLK                                  | 0 | 2.17 | 1.85 | FER Proto-oncogene tyrosine-protein kinase FER                                          |
| IPI00005142 | DIHHID <sub>p</sub> Y <sub>p</sub> YKK                       | 0 | 1.68 | 2.26 | FGFR1 Isoform 1 of Basic fibroblast growth factor receptor 1 precursor                  |
| IPI00005142 | RPPGLE <sub>p</sub> YCYNPSHNPEQLSSK                          | 0 | 1.67 | 1.69 | FGFR1 Isoform 1 of Basic fibroblast growth factor receptor 1 precursor                  |
| IPI00010680 | DINNID <sub>p</sub> Y <sub>p</sub> YKK                       | 0 | 1.28 | 1.42 | FGFR2 Isoform 1 of Fibroblast growth factor receptor 2 precursor                        |
| IPI00304578 | GVHHID <sub>p</sub> Y <sub>p</sub> YKK                       | 0 | 1.44 | 2.49 | FGFR4 Fibroblast growth factor receptor 4 precursor                                     |
| IPI00054004 | YFDSGD <sub>p</sub> YNMAK                                    | 0 | 2.48 | 1.69 | hCG_1790474 Uncharacterized protein ENSP00000354428                                     |
| IPI00215965 | SSGPGYGGGQ <sub>p</sub> YFAKPR                               | 0 | 2.02 | 1.97 | HNRNPA1 Isoform A1-B of Heterogeneous nuclear ribonucleoprotein A1                      |
| IPI00419373 | SSGSPYGGG <sub>p</sub> YSGSGSGGYGSR                          | 0 | 1.49 | 1.50 | HNRNPA3 Isoform 1 of Heterogeneous nuclear ribonucleoprotein A3                         |
| IPI00027232 | ASFDERQ <sub>p</sub> YAHMNGGR                                | 0 | 2.76 | 2.19 | IGF1R Insulin-like growth factor 1 receptor precursor                                   |
| IPI00025803 | D <sub>p</sub> YETD <sub>p</sub> Y <sub>p</sub> YRK          | 0 | 1.93 | 1.42 | INSR Insulin receptor                                                                   |
| IPI00464978 | VAYHPYED <sub>p</sub> YGDIEIGSHR                             | 0 | 2.78 | 1.79 | IRS2 Insulin receptor substrate 2 insertion mutant (Fragment)                           |
| IPI00021396 | FH <sub>p</sub> YDNTAGISQYLQNSK                              | 0 | 2.29 | 1.75 | KDR Vascular endothelial growth factor receptor 2 precursor                             |
| IPI00023704 | NDSDP <sub>p</sub> Y <sub>p</sub> YQGHPNTWK                  | 0 | 1.56 | 1.45 | LPP Lipoma-preferred partner                                                            |
| IPI00023704 | YYEG <sub>p</sub> Y <sub>p</sub> YAAGPGYGGGR                 | 0 | 1.34 | 1.39 | LPP Lipoma-preferred partner                                                            |
| IPI00478892 | VICSDCYDNAN <sub>p</sub> YYSR                                | 0 | 1.55 | 1.31 | LRIG2 Leucine-rich repeats and immunoglobulin-like domains protein 2 precursor          |
| IPI00003479 | VADPDHDH <sub>p</sub> TGFLTE <sub>p</sub> YVATR              | 0 | 1.41 | 2.31 | MAPK1 Mitogen-activated protein kinase 1                                                |
| IPI00005741 | HADAEMTG <sub>p</sub> YVVTR                                  | 0 | 1.74 | 1.44 | MAPK13 Mitogen-activated protein kinase 13                                              |
| IPI00018195 | IADPEHDH <sub>p</sub> TGFLTE <sub>p</sub> YVATR              | 0 | 1.17 | 2.29 | MAPK3 Mitogen-activated protein kinase 3                                                |
| IPI00018195 | IADPEHDHTGFL <sub>p</sub> TE <sub>p</sub> YVATR              | 0 | 0.98 | 2.06 | MAPK3 Mitogen-activated protein kinase 3                                                |
| IPI00064607 | DSP <sub>p</sub> YAEINNSTSANR                                | 0 | 2.40 | 1.92 | MEGF10 Isoform 1 of Multiple epidermal growth factor-like domains 10 precursor          |
| IPI00064607 | LSQDP <sub>p</sub> YDLPK                                     | 0 | 2.36 | 1.61 | MEGF10 Isoform 1 of Multiple epidermal growth factor-like domains 10 precursor          |
| IPI00064607 | NSHIPCH <sub>p</sub> YDLLPVR                                 | 0 | 2.44 | 1.82 | MEGF10 Isoform 1 of Multiple epidermal growth factor-like domains 10 precursor          |
| IPI00064607 | SSECG <sub>p</sub> YVEMK                                     | 0 | 2.82 | 2.45 | MEGF10 Isoform 1 of Multiple epidermal growth factor-like domains 10 precursor          |
| IPI00101049 | LISQDIHSNT <sub>p</sub> YNYK                                 | 0 | 2.04 | 1.56 | NMD3 CGI-07 protein                                                                     |
| IPI00292056 | LLGSVD <sub>p</sub> YDGINDAITR                               | 0 | 1.30 | 1.54 | PIK3C2B Phosphatidylinositol-4-phosphate 3-kinase C2 domain-containing beta polypeptide |
| IPI00005264 | AHYTHSD <sub>p</sub> YQYSQR                                  | 0 | 1.32 | 1.99 | PKP2 Isoform 2 of Plakophilin-2                                                         |
| IPI00016736 | IGTAE <sub>p</sub> Y <sub>p</sub> GALYEGR                    | 0 | 2.07 | 1.31 | PLCG1 1-phosphatidylinositol-4,5-bisphosphate phosphodiesterase gamma-1                 |
| IPI00016736 | NGF <sub>p</sub> YVEANPMPTFK                                 | 0 | 1.45 | 1.29 | PLCG1 1-phosphatidylinositol-4,5-bisphosphate phosphodiesterase gamma-1                 |
| IPI00014898 | GYYS <sub>p</sub> Y <sub>p</sub> SVSGSGTAGSR                 | 0 | 2.00 | 1.94 | PLEC1 Isoform 1 of Plectin-1                                                            |
| IPI00107819 | AALEYLGSFDH <sub>p</sub> YAT                                 | 0 | 2.07 | 1.50 | PTPRD PTPRD protein                                                                     |
| IPI00220490 | CFPAGSDMNSV <sub>p</sub> YER                                 | 0 | 2.03 | 1.59 | SHANK2 Isoform 1 of SH3 and multiple ankyrin repeat domains protein 2                   |
| IPI00220490 | ELDRYSLDSEDL <sub>p</sub> YSR                                | 0 | 1.81 | 1.66 | SHANK2 Isoform 1 of SH3 and multiple ankyrin repeat domains protein 2                   |
| IPI00220490 | GQMPEN <sub>p</sub> YSEVGK                                   | 0 | 2.09 | 1.66 | SHANK2 Isoform 1 of SH3 and multiple ankyrin repeat domains protein 2                   |
| IPI00017578 | GESAG <sub>p</sub> YMEPYEAQR                                 | 0 | 1.93 | 1.88 | SHB Shb                                                                                 |
| IPI00017578 | LD <sub>p</sub> YCGSGEPGVQR                                  | 0 | 2.47 | 2.55 | SHB Shb                                                                                 |
| IPI00017578 | LPQDDRRPADE <sub>p</sub> YDQPWEWNR                           | 0 | 1.16 | 1.50 | SHB Shb                                                                                 |
| IPI00017578 | VTIADD <sub>p</sub> YSDPFDK                                  | 0 | 1.93 | 1.52 | SHB Shb                                                                                 |
| IPI00513796 | ELFDDPS <sub>p</sub> YVNVQNLDK                               | 0 | 1.75 | 1.77 | SHC1 SHC (Src homology 2 domain containing) transforming protein 1                      |
| IPI00306505 | GSNE <sub>p</sub> YTEGPSVVK                                  | 0 | 1.47 | 1.50 | SPRY1 Protein sprouty homolog 1                                                         |
| IPI00003843 | HQYS <sub>p</sub> YDYHSSSEK                                  | 0 | 1.22 | 1.95 | TJP2 Isoform A1 of Tight junction protein ZO-2                                          |
| IPI00552750 | VSS <sub>p</sub> TH <sub>p</sub> Y <sub>p</sub> YLLPERPSYLER | 0 | 1.52 | 1.22 | TNK2 Activated CDC42 kinase 1                                                           |
| IPI00307545 | HPAGV <sub>p</sub> YQVSGLHNK                                 | 0 | 1.29 | 1.35 | TNS1 Tensin-1                                                                           |

|             |               |   |      |      |                                              |
|-------------|---------------|---|------|------|----------------------------------------------|
| IPI00301561 | QApYEPPPPPAYR | 0 | 1.33 | 1.40 | TRIP6 Thyroid receptor-interacting protein 6 |
|-------------|---------------|---|------|------|----------------------------------------------|

**Cluster 4**

| IPI accession no. | Phosphopeptides                 | 0 min | 5 min | 15 min | Protein                                                                               |
|-------------------|---------------------------------|-------|-------|--------|---------------------------------------------------------------------------------------|
| IPI00395663       | EEDEHPpYELLTAETK                | 0     | 1.32  | 1.25   | ANKS1A Ankyrin repeat and SAM domain-containing protein 1A                            |
| IPI0004497        | GHGQPGADAIEKFPpYVNVFHHHER       | 0     | 1.19  | 1.09   | BCR Isoform 1 of Breakpoint cluster region protein                                    |
| IPI00059185       | HVHLENATEpYATLR                 | 0     | 1.53  | 0.19   | C11orf52 Uncharacterized protein C11orf52                                             |
| IPI00016670       | ALNGAEPNpYHSLPSAR               | 0     | 1.11  | 0.91   | C11orf59 UPF0404 protein C11orf59                                                     |
| IPI00029601       | GPVSGTEPEPpYSMEAADYR            | 0     | 1.09  | 0.90   | CTTN Src substrate cortactin                                                          |
| IPI00029601       | LPSSVPpYEDAASFK                 | 0     | 1.83  | 1.18   | CTTN Src substrate cortactin                                                          |
| IPI00029601       | TQpTPPVSPAPQTEERLPSSVPpYEDAASFK | 0     | 1.31  | 0.69   | CTTN Src substrate cortactin                                                          |
| IPI00019146       | TQpYNQVPSEDFER                  | 0     | 1.03  | 0.53   | CXADR Isoform 1 of Coxsackievirus and adenovirus receptor precursor                   |
| IPI00396435       | HRLDLGEDpYPSGK                  | 0     | 1.11  | 0.97   | DHX15 Putative pre-mRNA-splicing factor ATP-dependent RNA helicase DHX15              |
| IPI00257508       | GLpYDGPVCEVSVTPK                | 0     | 1.14  | 0.77   | DPYSL2 Dihydropyrimidinase-related protein 2                                          |
| IPI00024307       | VSGDpYGHVPVYIVQEMPPQSPANIYYKV   | 0     | 1.32  | 1.05   | EFNB1 Ephrin-B1 precursor                                                             |
| IPI00011652       | VPSSGPpYDCPASFSHLTR             | 0     | 1.17  | 0.52   | EFS Isoform Efs1 of Embryonal Fyn-associated substrate                                |
| IPI00018274       | GSHQISLDNDPpYQQDFFPK            | 0     | 1.20  | 0.84   | EGFR Isoform 1 of Epidermal growth factor receptor precursor                          |
| IPI00032003       | GYNDDpYEEESYFTTR                | 0     | 1.36  | 1.18   | EMD Emerin                                                                            |
| IPI00021267       | VLEDDPEATpYTTSGGK               | 0     | 1.21  | 1.11   | EPHA2 Ephrin type-A receptor 2 precursor                                              |
| IPI00289329       | VYIDPFTpYEDPNEAVR               | 0     | 1.22  | 1.19   | EPHB3 Ephrin type-B receptor 3 precursor                                              |
| IPI00438286       | AQIPEGDpYLSYR                   | 0     | 1.28  | 1.00   | ERBB2IP Isoform 1 of Protein LAP2                                                     |
| IPI00171499       | QWTTITAHSLIEGHpYVIGPK           | 0     | 1.70  | 1.12   | FAM59A Isoform 3 of Protein FAM59A                                                    |
| IPI00005142       | DIHHIDpYYK                      | 0     | 1.82  | 0.97   | FGFR1 Isoform 1 of Basic fibroblast growth factor receptor 1 precursor                |
| IPI00010680       | RPPGMEpYSYDINRVPEEQMTFK         | 0     | 1.29  | 1.22   | FGFR2 Isoform 1 of Fibroblast growth factor receptor 2 precursor                      |
| IPI00027174       | DVHNLDPpYYKK                    | 0     | 1.19  | 0.97   | FGFR3 Isoform 1 of Fibroblast growth factor receptor 3 precursor                      |
| IPI00186990       | ASSCETpYIEPQR                   | 0     | 1.66  | 0.80   | GAB2 Isoform 1 of GRB2-associated-binding protein 2                                   |
| IPI00186990       | GSLTGSETDNEVpYTFK               | 0     | 1.27  | 0.45   | GAB2 Isoform 1 of GRB2-associated-binding protein 2                                   |
| IPI00004901       | VPSEGApYDIHLPR                  | 0     | 1.09  | 0.79   | GPRC5C CDNA FLJ20242 fis, clone COLF6369                                              |
| IPI00013877       | DGMDNQQGpYGSVGR                 | 0     | 1.33  | 1.26   | HNRPH3 Isoform 1 of Heterogeneous nuclear ribonucleoprotein H3                        |
| IPI00025803       | DIYETDpYpYRK                    | 0     | 1.86  | 1.21   | INSR Insulin receptor                                                                 |
| IPI00464978       | APpYTCGGSDQYVLMSSPVGR           | 0     | 1.22  | 0.52   | IRS2 Insulin receptor substrate 2 insertion mutant (Fragment)                         |
| IPI00464978       | ApSSPAESSPEDSgPYMR              | 0     | 1.47  | 1.06   | IRS2 Insulin receptor substrate 2 insertion mutant (Fragment)                         |
| IPI00464978       | APYTCGGSDQpYVLMSSPVGR           | 0     | 1.21  | 0.63   | IRS2 Insulin receptor substrate 2 insertion mutant (Fragment)                         |
| IPI00464978       | GVPGCCpYSSLPR                   | 0     | 1.88  | 0.77   | IRS2 Insulin receptor substrate 2 insertion mutant (Fragment)                         |
| IPI00464978       | SDDpYMPMSPASVSAPK               | 0     | 1.07  | 0.39   | IRS2 Insulin receptor substrate 2 insertion mutant (Fragment)                         |
| IPI00464978       | SPLSDpYMNLDfSSPK                | 0     | 1.83  | -0.19  | IRS2 Insulin receptor substrate 2 insertion mutant (Fragment)                         |
| IPI00298625       | VIEDNEpYTAR                     | 0     | 1.00  | 0.88   | LYN Isoform LYN A of Tyrosine-protein kinase Lyn                                      |
| IPI00296283       | QADSEMTPpYVVTR                  | 0     | 1.33  | 1.02   | MAPK12 Mitogen-activated protein kinase 12                                            |
| IPI00018195       | IADPEHDTGFLTEpYVATR             | 0     | 1.26  | 1.13   | MAPK3 Mitogen-activated protein kinase 3                                              |
| IPI00289258       | CSVGTpYNSSGAYR                  | 0     | 1.61  | 0.46   | MYO10 Myosin-X                                                                        |
| IPI00003373       | FYPESPpYK                       | 0     | 1.26  | 1.20   | OCLN Occludin                                                                         |
| IPI00031386       | EAGFSpYSHAGLSNR                 | 0     | 2.62  | 0.63   | PIK3CA Phosphatidylinositol-4,5-bisphosphate 3-kinase catalytic subunit alpha isoform |
| IPI00026952       | GQpYHTLQAGFSSR                  | 0     | 1.22  | 1.02   | PKP3 Plakophilin-3                                                                    |
| IPI00012885       | pYMEDpSTYYKASK                  | 0     | 1.11  | 1.03   | PTK2 Isoform 1 of Focal adhesion kinase 1                                             |
| IPI00012885       | pYMEDSpYYKASK                   | 0     | 1.27  | 0.92   | PTK2 Isoform 1 of Focal adhesion kinase 1                                             |
| IPI00012885       | YMEDSpTpYYKASK                  | 0     | 1.12  | 1.05   | PTK2 Isoform 1 of Focal adhesion kinase 1                                             |

|             |                      |   |      |      |                                                                                   |
|-------------|----------------------|---|------|------|-----------------------------------------------------------------------------------|
| IPI00012885 | YMEDSpTYpYK          | 0 | 1.37 | 1.08 | PTK2 Isoform 1 of Focal adhesion kinase 1                                         |
| IPI00012885 | YMEDSTpYpYKASK       | 0 | 1.28 | 0.93 | PTK2 Isoform 1 of Focal adhesion kinase 1                                         |
| IPI00012885 | YMEDSTpYYK           | 0 | 1.31 | 0.97 | PTK2 Isoform 1 of Focal adhesion kinase 1                                         |
| IPI00023974 | YGLFKEENpYAR         | 0 | 1.31 | 0.95 | PTTG1IP Pituitary tumor-transforming gene 1 protein-interacting protein precursor |
| IPI00220030 | FIHQQPQSpSSpVpYGSSAK | 0 | 1.15 | 1.03 | PXN Isoform Alpha of Paxillin                                                     |
| IPI00555917 | FIHQQPQSpSSpVpYGSSAK | 0 | 1.15 | 1.03 | PXN Paxillin variant (Fragment)                                                   |
| IPI00555917 | FIHQQPQSSpVpYGSSAK   | 0 | 1.01 | 0.97 | PXN Paxillin variant (Fragment)                                                   |
| IPI0007582  | SAENGlpYSVSGDEK      | 0 | 1.02 | 0.61 | SLC6A8 Sodium- and chloride-dependent creatine transporter 1                      |
| IPI0000878  | YVLDDQpYTSSSGAK      | 0 | 1.46 | 0.77 | TEC Tyrosine-protein kinase Tec                                                   |
| IPI00335824 | IDSPGFKPASQVpYR      | 0 | 1.09 | 0.71 | TJP1 Isoform Short of Tight junction protein ZO-1                                 |
| IPI00011676 | VIpYDFIEK            | 0 | 1.05 | 0.56 | WASL Neural Wiskott-Aldrich syndrome protein                                      |

**Cluster 5**

| IPI accession no. | Phosphopeptides        | 0 min | 5 min | 15 min | Protein                                                            |
|-------------------|------------------------|-------|-------|--------|--------------------------------------------------------------------|
| IPI00031068       | SSGSGSSVADERVDpYVVVDQK | 0     | 2.90  | 3.76   | GAB1 Isoform 1 of GRB2-associated-binding protein 1                |
| IPI00215965       | NQGGpYGGSSSSSYGSGR     | 0     | 1.65  | 3.12   | HNRNPA1 Isoform A1-B of Heterogeneous nuclear ribonucleoprotein A1 |
| IPI00470360       | AVLpYADYR              | 0     | 1.81  | 3.93   | KIRREL Isoform 1 of Kin of IRRE-like protein 1 precursor           |
| IPI00025830       | SPAAPpYFLGSSFSFVR      | 0     | 3.64  | 2.85   | WEE1 Wee1-like protein kinase                                      |
